# Supplementary material for: Highly enantioselective aza-ene-type reaction catalyzed by chiral N,N′-dioxide-nickel(ii) complex
Source: Royal Society of Chemistry journal article supplement (doi:10.1039/b921042c), 2010-01-01
Supplement: b921042c.pdf [file b921042c.pdf]

**Supporting Information for:**

# Highly Enantioselective Aza-ene-type Reaction Catalyzed by Chiral *N,N'*-Dioxide-Nickel(II) Complex

*Ke Zheng, Xiaohua Liu, Jiannan Zhao, Yang Yang, Lili Lin, and Xiaoming Feng\**

Key Laboratory of Green Chemistry & Technology, Ministry of Education, College of Chemistry,

Sichuan University, Chengdu 610064, P. R. China

**CONTENTS:**

|                                                                                              |     |
|----------------------------------------------------------------------------------------------|-----|
| (A) General.....                                                                             | S2  |
| (B) General procedure for chiral <i>N,N'</i> -dioxide preparation.....                       | S2  |
| (C) General procedure for the enantioselective catalytic aza-ene-type reaction.....          | S3  |
| (D) Optimization of conditions.....                                                          | S3  |
| (E) The analytical and spectral characterization data of aza-ene-type reaction products..... | S9  |
| (F) Copies of NMR spectra for the catalysts and aza-ene-type reaction products.....          | S59 |
| (G) References.....                                                                          | S90 |

## (A) General

$^1\text{H}$  NMR spectra were recorded on commercial instruments (400 MHz). Chemical shifts are recorded in ppm relative to tetramethylsilane and with the solvent resonance as the internal standard. Data are reported as follows: chemical shift, multiplicity (s = singlet, d = doublet, t = triplet, m = multiplet, br = broad), coupling constants (Hz), integration.  $^{13}\text{C}$  NMR data were collected on commercial instruments (100 MHz) with complete proton decoupling. Chemical shifts are reported in ppm from the tetramethylsilane with the solvent resonance as internal standard. Enantiomer excesses were determined by chiral HPLC analysis on DAICEL CHIRALCEL AD-H/OJ-H/IB/AS-H in comparison with the authentic racemates. Optical rotations were reported as follows:  $[\alpha]_{\text{D}}^{\text{T}}$  (c: g/100 mL, in solvent). HRMS was recorded on a commercial apparatus (ESI Source). All the solvents were purified by usual methods before use. Glyoxal derivatives **1a-1r** were synthesized according to the previously reported method.<sup>[1]</sup> Enamides **2a-2i** and enecarbamates **3a-3d** were prepared in accordance with literature methods.<sup>[2]</sup>

## (B) General procedure for chiral *N,N'*-dioxide preparation

The *N,N'*-dioxide ligands **L1-L5** were synthesized by the same procedure in the literature.<sup>[3]</sup>

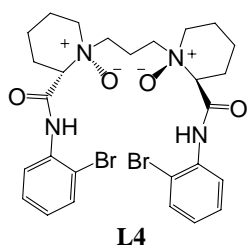

Ligand **L4**: white solid;  $[\alpha]_{\text{D}}^{29} = -57.1$  (c 0.65 in  $\text{CH}_2\text{Cl}_2$ ).  $^1\text{H}$  NMR (400 MHz,  $\text{CDCl}_3$ ): 1.41-1.45 (m, 2 H), 1.64-1.70 (m, 2 H), 1.84-1.92 (m, 2 H), 2.00-2.06 (m, 2 H), 2.35-2.56 (m, 4 H), 2.67-2.73 (m, 2 H), 2.87-2.90 (m, 2 H), 3.52-3.60 (m, 8 H), 6.89-6.93 (m, ArH, 2 H), 7.19-7.23 (m, ArH, 2 H), 7.44-7.46 (m, ArH, 2 H),

8.12-7.17 (m, ArH, 2 H), 13.40 (s, NH, 2 H), ppm;  $^{13}\text{C}$  NMR (100 MHz,  $\text{CDCl}_3$ ): 16.3, 20.1, 22.3, 26.4, 64.5, 66.8, 76.1, 114.2, 122.7, 125.2, 127.8, 132.6, 136.5, 167.1 ppm. ESI-HRMS: calcd for  $\text{C}_{27}\text{H}_{34}\text{Br}_2\text{N}_4\text{O}_4$   $[\text{M}+\text{H}^+]$  637.1020, found 637.1032.

### C) General procedure for the enantioselective catalytic aza-ene-type reaction

The mixture of *N,N'*-dioxide **L4** (3.2 mg, 0.005 mmol) and  $\text{Ni}(\text{BF}_4)_2 \cdot 6\text{H}_2\text{O}$  (1.7 mg, 0.005 mmol) in  $\text{CH}_2\text{Cl}_2$  (1.0 mL) were stirred at 23 °C for 30 min. Then, phenylglyoxal **1a** (0.10 mmol) and enamide **2a** (0.11 mmol) were added to the mixture at 23 °C. After being stirred at 23 °C in air for 8 h, the reaction mixture was directly purified by column chromatography on silica gel eluted (ether : petroleum ether = 1 : 2) to afford the corresponding product **5a**.

### (D) Optimization of conditions

#### Screening of metals<sup>[a]</sup>

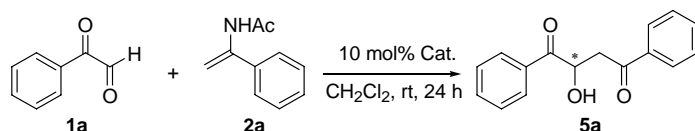

| Entry | Ligand    | Metal                                                 | Yield [%] <sup>[b]</sup> | ee [%] <sup>[c]</sup> |
|-------|-----------|-------------------------------------------------------|--------------------------|-----------------------|
| 1     | <b>L1</b> | $\text{Cu}(\text{AcO})_2$                             | trace                    | -                     |
| 2     | <b>L1</b> | $\text{Cu}(\text{OTf})_2$                             | 47                       | 15                    |
| 3     | <b>L1</b> | $\text{Yb}(\text{OTf})_2$                             | 58                       | 67                    |
| 4     | <b>L1</b> | $\text{Sc}(\text{OTf})_3$                             | 63                       | -7                    |
| 5     | <b>L1</b> | $\text{Zn}(\text{OTf})_2$                             | 43                       | 4                     |
| 6     | <b>L1</b> | $\text{Ni}(\text{ClO}_4)_2 \cdot 6\text{H}_2\text{O}$ | 50                       | 94                    |
| 7     | <b>L1</b> | $\text{Ni}(\text{BF}_4)_2 \cdot 6\text{H}_2\text{O}$  | 78                       | 94                    |
| 8     | <b>L1</b> | $\text{Ni}(\text{acac})_2$                            | trace                    | -                     |
| 9     | <b>L1</b> | $\text{Ni}(\text{AcO})_2$                             | trace                    | -                     |
| 10    | <b>L1</b> | $\text{NiBr}_2$                                       | trace                    | -                     |
| 11    | -         | $\text{Ni}(\text{BF}_4)_2 \cdot 6\text{H}_2\text{O}$  | 56                       | -                     |

[a] The reaction was carried out with 0.1 mmol phenylglyoxal, 0.11 mmol enamide **2a** in  $\text{CH}_2\text{Cl}_2$  (1.0 mL). [b] Isolated yield. [c] Determined by chiral HPLC.

### Screening of solvents<sup>[a]</sup>

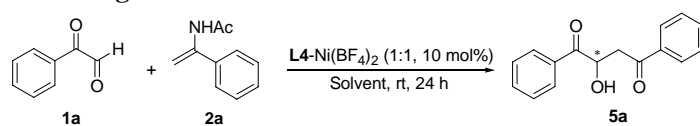

| Entry | solvent                              | Yield [%] <sup>[b]</sup> | ee [%] <sup>[c]</sup> |
|-------|--------------------------------------|--------------------------|-----------------------|
| 1     | THF                                  | trace                    | -14                   |
| 2     | Et <sub>2</sub> O                    | 26                       | 10                    |
| 3     | Toluene                              | trace                    | 22                    |
| 4     | DMF                                  | trace                    | -                     |
| 5     | CH <sub>2</sub> Cl <sub>2</sub>      | 93                       | >99                   |
| 6     | CH <sub>2</sub> ClCH <sub>2</sub> Cl | 83                       | 99                    |
| 7     | CHCl <sub>3</sub>                    | 42                       | 92                    |

[a] The reaction was carried out with 0.1 mmol phenylglyoxal, 0.11 mmol enamide **2a** in solvent (1.0 mL). [b] Isolated yield. [c] Determined by chiral HPLC.

### Optimization of the ratio between ligand and metal<sup>[a]</sup>

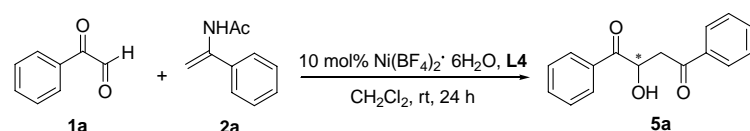

| Entry | ratio of ligand/metal | Yield [%] <sup>[b]</sup> | ee [%] <sup>[c]</sup> |
|-------|-----------------------|--------------------------|-----------------------|
| 1     | 2 : 1                 | 73                       | 75                    |
| 2     | 1.5 : 1               | 82                       | 85                    |
| 3     | 1 : 1                 | 93                       | >99                   |
| 4     | 1 : 1.5               | 93                       | 99                    |
| 5     | 1 : 2                 | 92                       | 99                    |
| 6     | 1 : 4                 | 87                       | 90                    |

[a] The reaction was carried out with 0.1 mmol phenylglyoxal, 0.11 mmol enamide **2a** in CH<sub>2</sub>Cl<sub>2</sub> (1.0 mL). [b] Isolated yield. [c] Determined by chiral HPLC.

### Optimization of the ratio between phenylglyoxal (1a) and enamide (2a)<sup>[a]</sup>

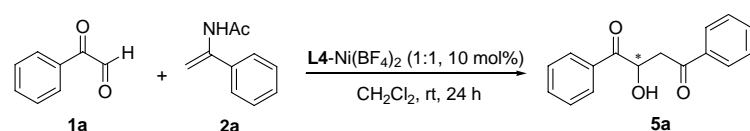

| Entry | ratio of <b>1a/2a</b> | Yield [%] <sup>[b]</sup> | ee [%] <sup>[c]</sup> |
|-------|-----------------------|--------------------------|-----------------------|
| 1     | 2 : 1                 | 58                       | 98                    |
| 2     | 1.1 : 1               | 63                       | 98                    |
| 3     | 1 : 1                 | 90                       | 99                    |
| 4     | 1 : 1.1               | 93                       | >99                   |

5 1 : 2 92 94

[a] The reaction was carried out in CH<sub>2</sub>Cl<sub>2</sub> (1.0 mL). [b] Isolated yield. [c] Determined by chiral HPLC.

### Optimization of additive<sup>[a]</sup>

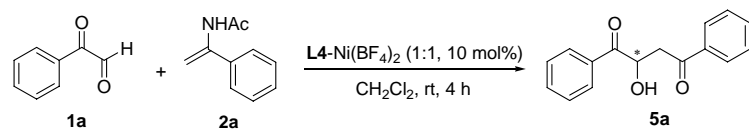

| Entry | additive                         | Yield [%] <sup>[b]</sup> | ee [%] <sup>[c]</sup> |
|-------|----------------------------------|--------------------------|-----------------------|
| 1     | 3Å MS                            | 76                       | 97                    |
| 2     | 4Å MS                            | 79                       | 98                    |
| 3     | 5Å MS                            | 83                       | 99                    |
| 4     | <sup>i</sup> Pr <sub>2</sub> NEt | trace                    | -                     |
| 5     | phenol                           | 85                       | 96                    |
| 6     | benzoic acid                     | 63                       | 98                    |

[a] The reaction was carried out with 0.1 mmol phenylglyoxal, 0.11 mmol enamide **2a** in CH<sub>2</sub>Cl<sub>2</sub> (1.0 mL). [b] Isolated yield. [c] Determined by chiral HPLC.

### Optimization of temperature<sup>[a]</sup>

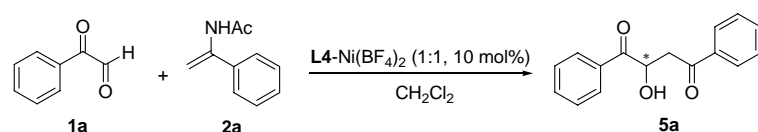

| Entry | temperature [°C] | time [h] | Yield [%] <sup>[b]</sup> | ee [%] <sup>[c]</sup> |
|-------|------------------|----------|--------------------------|-----------------------|
| 1     | -20              | 64       | 45                       | >99                   |
| 2     | 0                | 32       | 74                       | >99                   |
| 3     | 15               | 16       | 92                       | >99                   |
| 3     | 23               | 12       | 93                       | >99                   |
| 4     | 30               | 7        | 86                       | 97                    |

[a] The reaction was carried out with 0.1 mmol phenylglyoxal, 0.11 mmol enamide **2a** in CH<sub>2</sub>Cl<sub>2</sub> (1.0 mL). [b] Isolated yield. [c] Determined by chiral HPLC.

### Optimization of nucleophile<sup>[a]</sup>

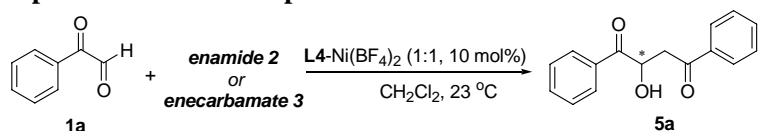

| Entry | Nucleophile | time [h] | Yield [%] <sup>[b]</sup> | ee [%] <sup>[c]</sup> |
|-------|-------------|----------|--------------------------|-----------------------|
| 1     | <b>2a</b>   | 12       | 93                       | >99                   |
| 2     | <b>3a</b>   | 3        | 99                       | >99                   |

|   |           |   |    |    |
|---|-----------|---|----|----|
| 3 | <b>3b</b> | 3 | 92 | 97 |
| 4 | <b>3c</b> | 3 | 94 | 98 |
| 5 | <b>3d</b> | 3 | 99 | 97 |

[a] The reaction was carried out with 0.1 mmol phenylglyoxal, 0.11 mmol enamide **2** (enecarbamate **3**) in CH<sub>2</sub>Cl<sub>2</sub> (1.0 mL). [b] Isolated yield. [c] Determined by chiral HPLC.

### Optimization of catalyst loading<sup>[a]</sup>

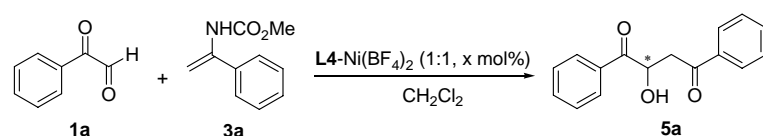

| Entry | catalyst loading [mol %] | time [h] | Yield [%] <sup>[b]</sup> | ee [%] <sup>[c]</sup> |
|-------|--------------------------|----------|--------------------------|-----------------------|
| 1     | 10                       | 3        | 99                       | >99                   |
| 2     | 5                        | 8        | 93                       | 99                    |
| 3     | 2.5                      | 16       | 91                       | 99                    |
| 4     | 1                        | 32       | 82                       | 97                    |
| 5     | 0.25                     | 48       | 70                       | 92                    |

[a] The reaction was carried out with 0.1 mmol phenylglyoxal, 0.11 mmol enecarbamate **3a** in CH<sub>2</sub>Cl<sub>2</sub> (1.0 mL). [b] Isolated yield. [c] Determined by chiral HPLC.

### Full list of substrates

**Table 1** Substrate scope for the catalytic enantioselective aza-ene-type reaction with enecarbamate<sup>[a]</sup>

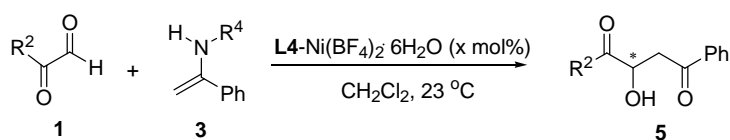

R<sup>2</sup> = Aryl, Alkyl, etc

| Entry | R <sup>2</sup>                     | R <sup>4</sup>                  | x [mol %] | Yield [%] <sup>[b]</sup> | ee [%] <sup>[c]</sup> |
|-------|------------------------------------|---------------------------------|-----------|--------------------------|-----------------------|
| 1     | Ph                                 | CO <sub>2</sub> Me              | 5         | 93                       | 99                    |
| 2     | Ph                                 | CO <sub>2</sub> Et              | 5         | 92                       | 97                    |
| 3     | Ph                                 | CO <sub>2</sub> <sup>t</sup> Bu | 5         | 94                       | 98                    |
| 4     | Ph                                 | CO <sub>2</sub> Bn              | 5         | 99                       | 97                    |
| 5     | 2-MeC <sub>6</sub> H <sub>4</sub>  | CO <sub>2</sub> Me              | 5         | 89                       | >99                   |
|       |                                    |                                 | 2.5       | 83                       | 98                    |
| 6     | 3-MeC <sub>6</sub> H <sub>4</sub>  | CO <sub>2</sub> Me              | 5         | 90                       | 98                    |
|       |                                    |                                 | 2.5       | 85                       | 98                    |
| 7     | 4-MeC <sub>6</sub> H <sub>4</sub>  | CO <sub>2</sub> Me              | 5         | 95                       | 99                    |
|       |                                    |                                 | 2.5       | 90                       | 99                    |
|       |                                    |                                 | 1         | 83                       | 96                    |
| 8     | 3-MeOC <sub>6</sub> H <sub>4</sub> | CO <sub>2</sub> Me              | 5         | 92                       | 99                    |
|       |                                    |                                 | 2.5       | 84                       | 98                    |
| 9     | 4-MeOC <sub>6</sub> H <sub>4</sub> | CO <sub>2</sub> Me              | 5         | 99                       | >99                   |

|    |                                                      |                    |     |    |                       |
|----|------------------------------------------------------|--------------------|-----|----|-----------------------|
|    |                                                      |                    | 2.5 | 94 | 99                    |
|    |                                                      |                    | 1   | 86 | 97                    |
| 10 | 3,4-(MeO) <sub>2</sub> C <sub>6</sub> H <sub>3</sub> | CO <sub>2</sub> Me | 5   | 92 | >99                   |
| 11 | 3-ClC <sub>6</sub> H <sub>4</sub>                    | CO <sub>2</sub> Me | 5   | 87 | 99                    |
| 12 | 4-ClC <sub>6</sub> H <sub>4</sub>                    | CO <sub>2</sub> Me | 5   | 92 | 99                    |
|    |                                                      |                    | 2.5 | 85 | 98                    |
| 13 | 3,4-Cl <sub>2</sub> C <sub>6</sub> H <sub>3</sub>    | CO <sub>2</sub> Me | 5   | 85 | 98                    |
| 14 | 4-FC <sub>6</sub> H <sub>4</sub>                     | CO <sub>2</sub> Me | 5   | 91 | 99                    |
|    |                                                      |                    | 2.5 | 82 | 98                    |
| 15 | 4-BrC <sub>6</sub> H <sub>4</sub>                    | CO <sub>2</sub> Me | 5   | 82 | 99                    |
| 16 | 3-NO <sub>2</sub> C <sub>6</sub> H <sub>4</sub>      | CO <sub>2</sub> Me | 5   | 80 | 99                    |
| 17 | 4-NO <sub>2</sub> C <sub>6</sub> H <sub>4</sub>      | CO <sub>2</sub> Me | 5   | 72 | 99                    |
| 18 | 2-naphthyl                                           | CO <sub>2</sub> Me | 5   | 86 | 99                    |
| 19 | 2-furyl                                              | CO <sub>2</sub> Me | 5   | 75 | 99                    |
| 20 | 2-thienyl                                            | CO <sub>2</sub> Me | 5   | 86 | 98                    |
| 21 | <i>c</i> -hexyl                                      | CO <sub>2</sub> Me | 5   | 70 | 99                    |
| 22 | OEt                                                  | CO <sub>2</sub> Me | 5   | 85 | 98 (S) <sup>[d]</sup> |

[a] Unless otherwise noted, the reaction was carried out with 1-5 mol% **L4**-Ni(BF<sub>4</sub>)<sub>2</sub>·6H<sub>2</sub>O, 0.1 mmol of glyoxal derivative (glyoxylate), and 1.1 equiv of enecarbamate **3** in CH<sub>2</sub>Cl<sub>2</sub> (1.0 mL) at 23 °C for 3-18 h. [b] Isolated yield. [c] Determined by chiral HPLC analysis. [d] The absolute configuration of (S)-**5s** was determined by comparison with literature data.<sup>[2a]</sup>

**Table 2** Substrate scope for the catalytic enantioselective aza-ene-type reaction with enamide<sup>[a]</sup>

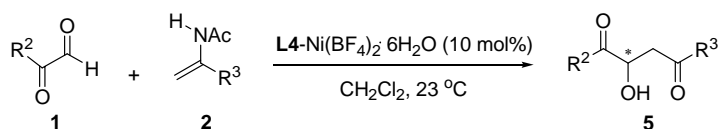

R<sup>2</sup> = Aryl, Alkyl, etc

| Entry | R <sup>2</sup> | R <sup>3</sup>                     | Product   | Yield [%] <sup>[b]</sup> | ee [%] <sup>[c]</sup> |
|-------|----------------|------------------------------------|-----------|--------------------------|-----------------------|
| 1     | Ph             | Ph                                 | <b>5a</b> | 93                       | >99                   |
| 2     | Ph             | 2-MeC <sub>6</sub> H <sub>4</sub>  | <b>5t</b> | 92                       | >99                   |
| 3     | Ph             | 3-MeC <sub>6</sub> H <sub>4</sub>  | <b>5u</b> | 92                       | >99                   |
| 4     | Ph             | 4-MeC <sub>6</sub> H <sub>4</sub>  | <b>5v</b> | 94                       | >99                   |
| 5     | Ph             | 4-MeOC <sub>6</sub> H <sub>4</sub> | <b>5w</b> | 95                       | 99                    |
| 6     | Ph             | 4-ClC <sub>6</sub> H <sub>4</sub>  | <b>5x</b> | 87                       | 99                    |
| 7     | Ph             | 4-FC <sub>6</sub> H <sub>4</sub>   | <b>5y</b> | 87                       | 99                    |
| 8     | Ph             | 2-naphthyl                         | <b>5z</b> | 91                       | >99                   |
| 9     | Ph             | <i>c</i> -hexyl                    | -         | N.R.                     | -                     |
| 10    | Ph             | <i>i</i> -Pr                       | -         | N.R.                     | -                     |
| 11    | Ph             | COOMe                              | -         | N.R.                     | -                     |

[a] Unless otherwise noted, the reaction was carried out with 10 mol% **L4**-Ni(BF<sub>4</sub>)<sub>2</sub>·6H<sub>2</sub>O, 0.1 mmol of glyoxal derivative, and 1.1 equiv of enamide **2** in CH<sub>2</sub>Cl<sub>2</sub> (1.0 mL) at 23 °C for 6-16 h. [b] Isolated yield. [c] Determined by chiral HPLC.

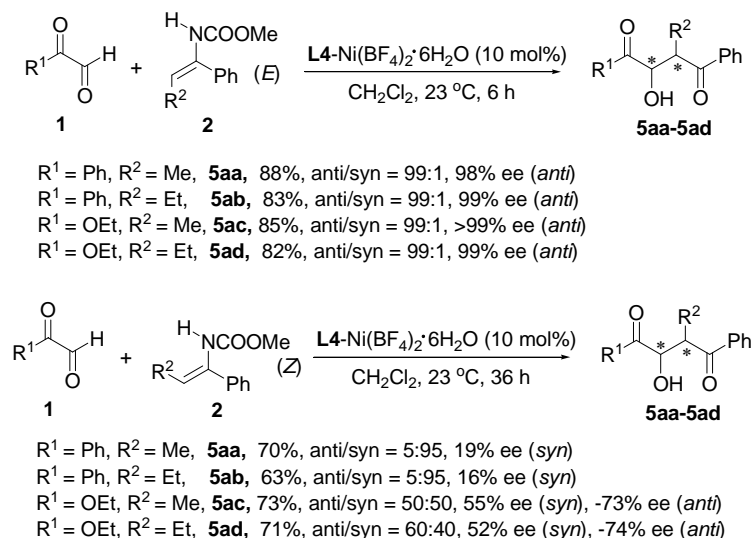

**Scheme 1** Substrate scope for the catalytic enantioselective aza-ene-type reaction with  $\alpha$ -substituted enecarbamates

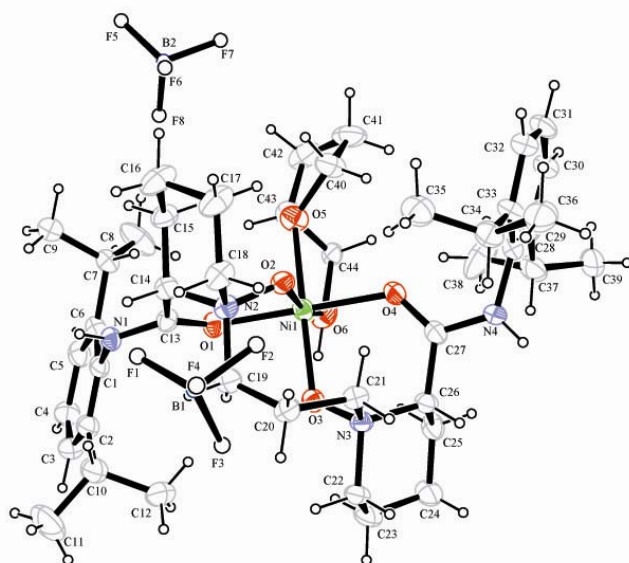

**Fig. 1** X-ray crystallographic structure of the **L3-Ni(II)** ·TFM (TFM = Tetrahydro-2-furanmethanol) complex.

Single crystals of  $\text{C}_{44}\text{H}_{69}\text{B}_2\text{F}_8\text{N}_4\text{NiO}_6$  **L3-Ni(II)** complex were crystallized from mixed solvents of THF and petroleum ether. The thermal ellipsoids' level is 20 % for the above crystal structure. We conjectured that the exogenous ligand (TFM) was come from the unpurified solvent THF.

**Crystal data.**  $\text{C}_{44}\text{H}_{69}\text{B}_2\text{F}_8\text{N}_4\text{NiO}_6$ ,  $M = 982.36$ , orthorhombic,  $a = 12.784(3)$ ,  $b = 13.268(3)$ ,  $c = 34.336(7)$  Å,  $U = 5824(2)$  Å<sup>3</sup>,  $T = 113$  K, space group  $P2_12_12_1$  (no. 19),  $Z = 4$ , 37884 reflections measured, 11378 unique ( $R_{\text{int}} = 0.0526$ ) which used in all calculations. The final  $wR(F_2)$  was 0.2144 (all data). The structure of compound **L3-Ni(II)** has been refined carefully by PLATON/SQUEEZE software. (ref.: A.L. Spek, *Acta Cryst. D*, 2009, **65**, 148-155.)



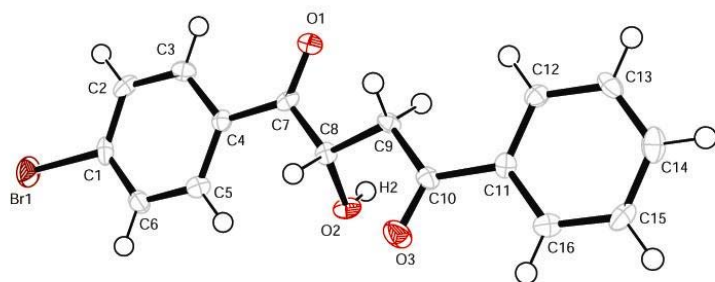

**Fig. 2** X-ray crystallographic structure of the product **5I**.

Single crystals of  $C_{16}H_{13}BrO_3$  **5I** were crystallized from mixed solvents of THF and petroleum ether. The absolute configuration of C8 is *S*. The thermal ellipsoids' level is 30 % for the above crystal structure.

**Crystal data.**  $C_{16}H_{13}BrO_3$ ,  $M = 330.00$ , orthorhombic,  $a = 5.5934(11)$ ,  $b = 7.4974(15)$ ,  $c = 31.910(6)$  Å,  $U = 1338.2(5)$  Å<sup>3</sup>,  $T = 113$  K, space group  $P2_12_12_1$  (no. 19),  $Z = 4$ , 10559 reflections measured, 3171 unique ( $R_{int} = 0.0691$ ) which used in all calculations. The final  $wR(F_2)$  was 0.0666 (all data).

**Reference(Program):**

**(1) Data reduction:**

CrystalClear,

Rigaku/MS(2005), CrystalClear and CrystalStructure, Rigaku/MS, The Woodlands , Texas, USA

**(2) Structure solution:**

(a) absorption correction

ABSCOR/multi-scan

Higashi,T. (1995) ABSCOR, Rigaku Corporation, Tokyo, Japan

(b) Structure Solution and refinement

SHELXS-97 and SHELXL-97

Sheldrick,G.M. (1997), SHELXS97 and SHELXL97, University of Gottingen, Germany

**(3) Graphics:**

Ortep-3 for Windows 1.076

Farrugia,L.J. (1997) *J. Appl. Cryst.* 30,565

**(E) The analytical and spectral characterization data of aza-ene-type reaction products**

## 2-hydroxy-1,4-diphenylbutane-1,4-dione (5a)

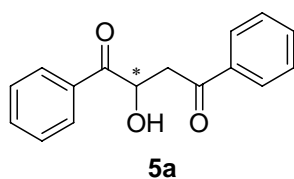

( $C_{16}H_{14}O_3$ ) a white solid; 93% yield, >99% ee.  $[\alpha]_D^{25} = +12.5$  ( $c$  0.440 in  $CH_2Cl_2$ ) HPLC DAICEL CHIRALCEL OJ-H, 2-propanol/ $n$ -hexane = 10/90, flow rate = 1.0 mL/min,  $\lambda = 254$  nm, retention time: 32.7 min (minor) and 36.0

min (major);  $^1H$  NMR (400 MHz,  $CDCl_3$ ) 3.37-3.49 (m, 2H), 4.04 (d,  $J = 6.0$  Hz, 1H), 5.68-5.73 (m, 1H), 7.46-7.55 (m, 4H), 7.58-7.66 (m, 2H), 7.95-8.01 (m, 4H) ppm.

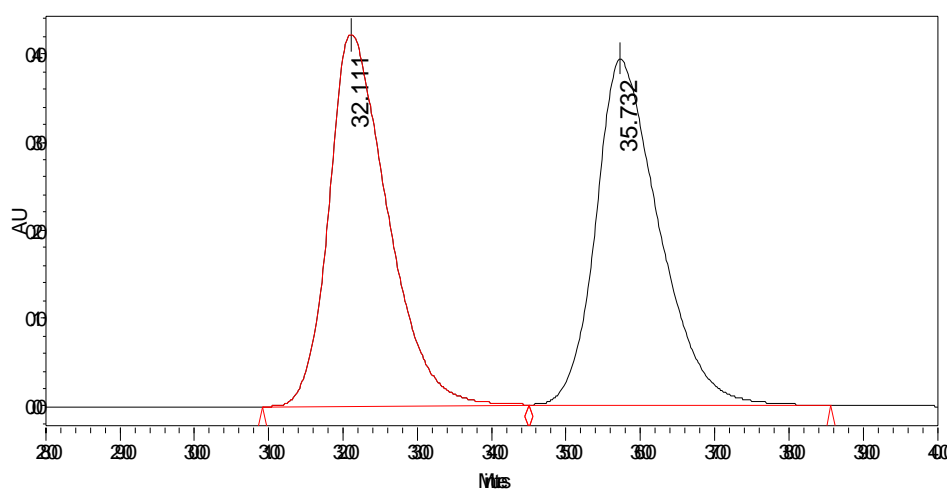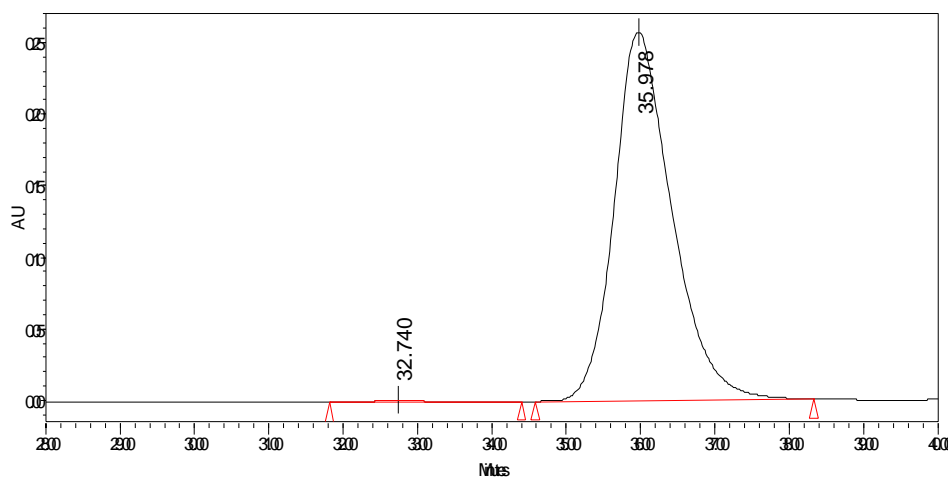

|   | Retention Time | Area  | % Area | Height | % Height | Start Time | End Time |
|---|----------------|-------|--------|--------|----------|------------|----------|
| 1 | 32.740         | 59289 | 0.42   | 1452   | 0.56     | 31.233     | 33.750   |

|   |        |          |       |        |       |        |        |
|---|--------|----------|-------|--------|-------|--------|--------|
| 2 | 35.978 | 13896192 | 99.58 | 257736 | 99.44 | 34.583 | 38.333 |
|---|--------|----------|-------|--------|-------|--------|--------|

### 2-hydroxy-4-phenyl-1-o-tolylbutane-1,4-dione (**5b**)

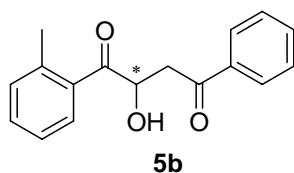

(**C<sub>17</sub>H<sub>16</sub>O<sub>3</sub>**) a colourless viscous liquid; 89% yield, >99% ee.  $[\alpha]_D^{25} = +9.1$  (*c*

0.460 in CH<sub>2</sub>Cl<sub>2</sub>) HPLC DAICEL CHIRALCEL OJ-H 2-propanol/*n*-hexane =

10/90, flow rate = 1.0 mL/min,  $\lambda = 254$  nm, retention time: 23.1 min (minor) and

24.4 min (major); <sup>1</sup>H NMR (400 MHz, CDCl<sub>3</sub>) 2.42 (s, 3H), 3.37-3.40 (m, 2H), 4.02 (d, *J* = 6.0 Hz, 1H),

5.65-5.69 (m, 1H), 7.36-7.47 (m, 4H), 7.55-7.59 (m, 1H), 7.50-7.80 (m, 2H), 7.93-7.95 (m, 2H) ppm;

<sup>13</sup>C NMR (100 MHz, CDCl<sub>3</sub>) 21.4, 43.7, 70.0, 125.9, 128.3, 128.7, 128.8, 129.2, 133.6, 134.8, 136.7,

138.9, 197.1, 201.0 ppm; HRMS (ESI-TOF) calcd for C<sub>17</sub>H<sub>16</sub>O<sub>3</sub> ([M-H<sup>+</sup>]) = 267.1021, Found 267.1030.

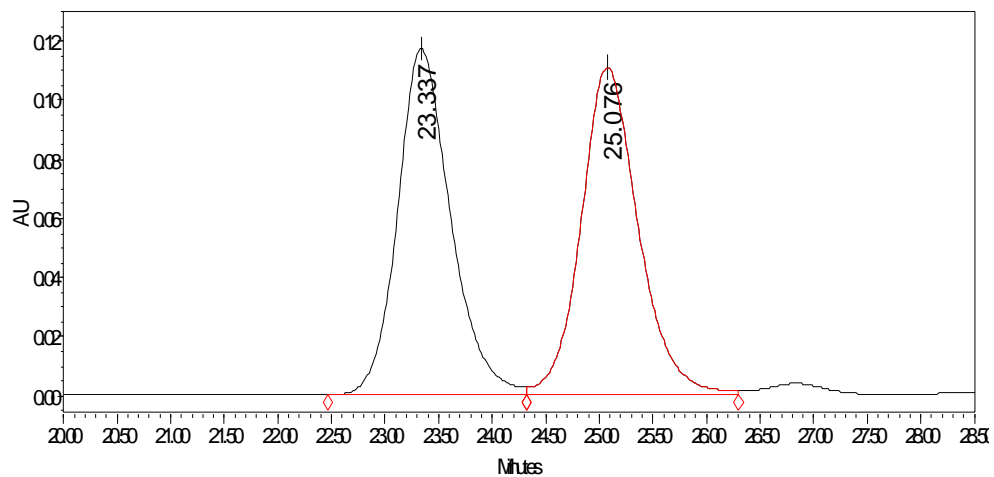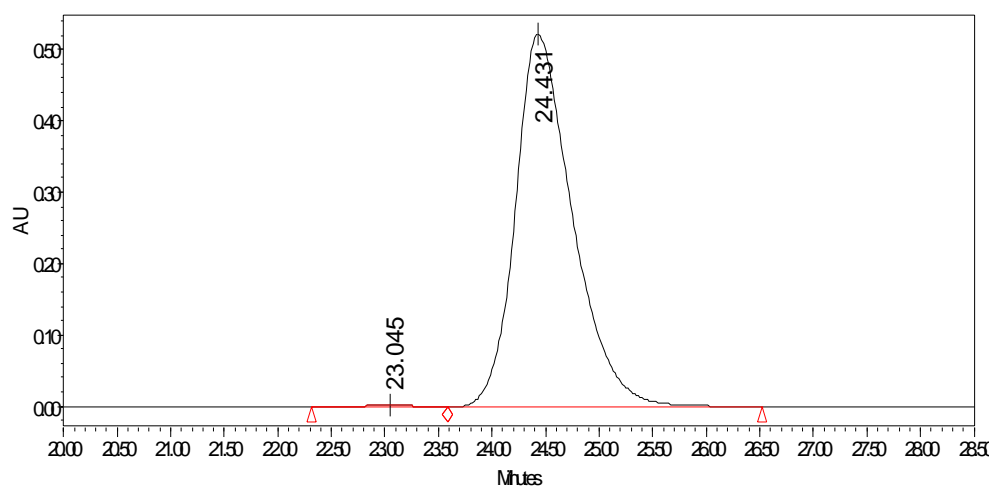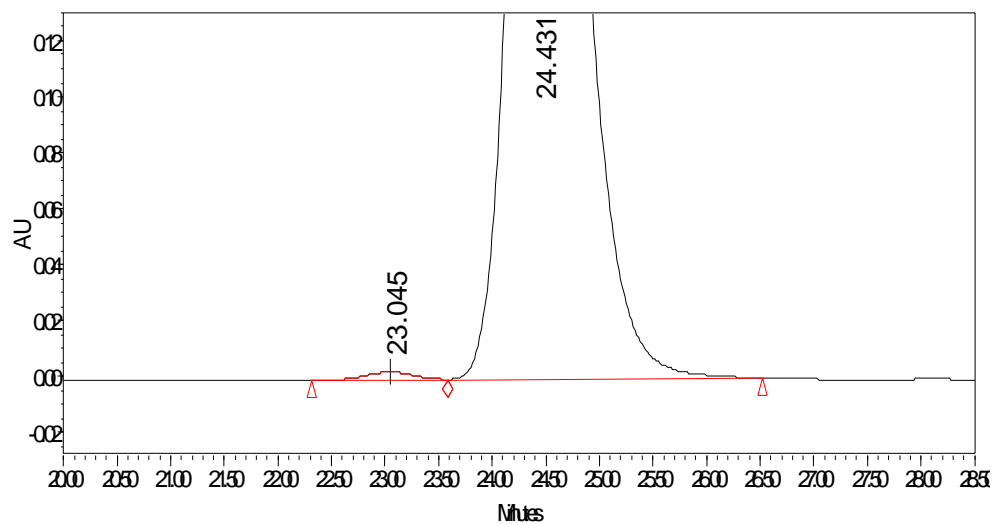

|   | Retention Time | Area  | % Area | Height | % Height | Start Time | End Time |
|---|----------------|-------|--------|--------|----------|------------|----------|
| 1 | 23.045         | 93728 | 0.48   | 2974   | 0.57     | 22.317     | 23.583   |

|   |        |          |       |        |       |        |        |
|---|--------|----------|-------|--------|-------|--------|--------|
| 2 | 24.431 | 19422004 | 99.52 | 523142 | 99.43 | 23.583 | 26.517 |
|---|--------|----------|-------|--------|-------|--------|--------|

### 2-hydroxy-4-phenyl-1-m-tolylbutane-1,4-dione (**5c**)

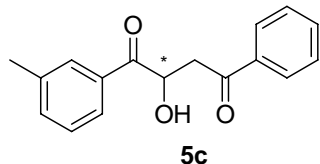

( $C_{17}H_{16}O_3$ ) a colourless viscous liquid; 90% yield, 98% ee.  $[\alpha]_D^{25} = +13.0$  ( $c$  0.432 in  $CH_2Cl_2$ ) HPLC DAICEL CHIRALCEL OJ-H, 2-propanol/ $n$ -hexane =

10/90, flow rate = 1.0 mL/min,  $\lambda = 254$  nm, retention time: 24.4 min (minor)

and 28.9 min (major);  $^1H$  NMR (400 MHz,  $CDCl_3$ ) 2.57 (s, 3H), 3.30-3.50 (m, 2H), 4.06 (d,  $J = 8.0$  Hz, 1H), 5.45-5.49 (m, 1H), 7.25-7.31 (m, 2H), 7.39-7.45 (m, 3H), 7.54-7.61 (m, 2H), 7.91-7.95 (m, 2H) ppm;  $^{13}C$  NMR (100 MHz,  $CDCl_3$ ) 20.9, 42.8, 71.2, 125.8, 128.3, 128.4, 128.7, 132.1, 132.3, 133.5, 134.1, 136.6, 139.5, 197.0, 203.9 ppm; HRMS (ESI-TOF) calcd for  $C_{17}H_{16}O_3$  ( $[M-H]^+$ ) = 267.1021, Found 267.1028.

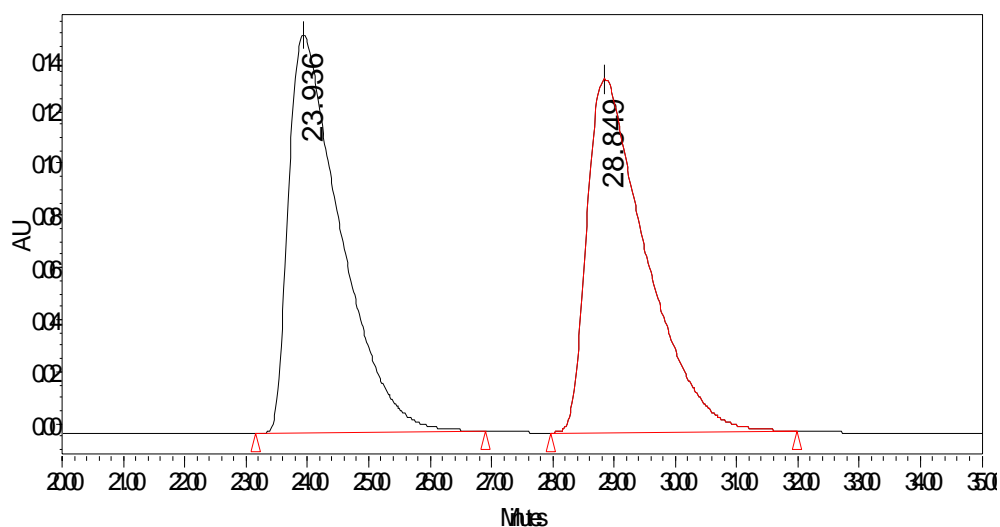

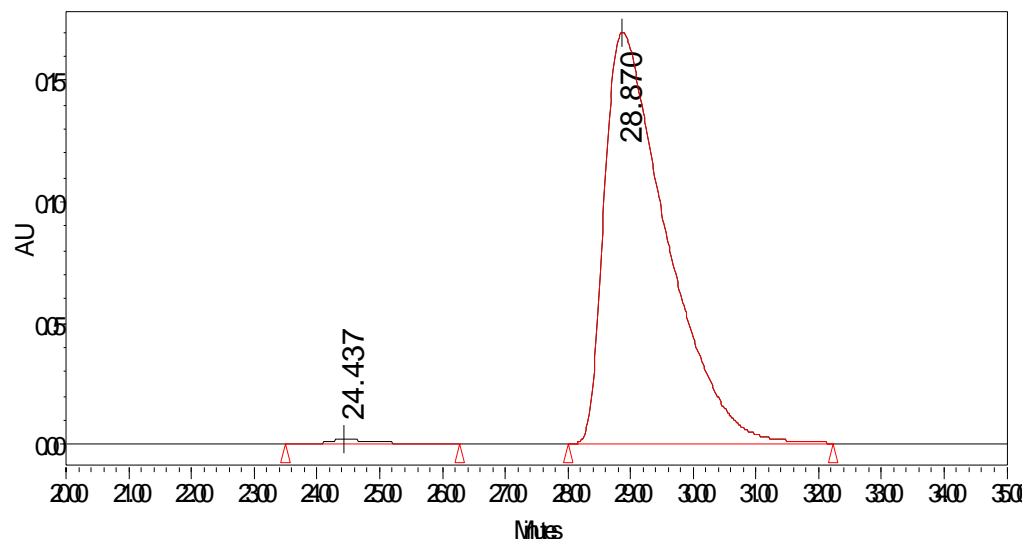

|   | Retention Time | Area     | % Area | Height | % Height | Start Time | End Time |
|---|----------------|----------|--------|--------|----------|------------|----------|
| 1 | 24.437         | 113763   | 0.96   | 1942   | 1.13     | 23.500     | 26.283   |
| 2 | 28.870         | 11688080 | 99.04  | 169635 | 98.87    | 28.000     | 32.233   |

### 2-hydroxy-4-phenyl-1-p-tolylbutane-1,4-dione (**5d**)

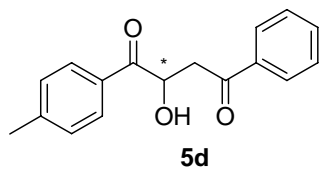

( $C_{17}H_{16}O_3$ ) a white solid; 95% yield, >99% ee.  $[\alpha]_D^{25} = +5.0$  (c 0.450 in  $CH_2Cl_2$ ) HPLC DAICEL CHIRALCEL IB, 2-propanol/*n*-hexane = 10/90, flow rate = 1.0 mL/min,  $\lambda = 254$  nm, retention time: 13.0 min (minor) and

14.1 min (major);  $^1H$  NMR (400 MHz,  $CDCl_3$ ) 2.42 (s, 3H), 3.31-3.44 (m, 2H), 4.03 (d,  $J = 6.0$  Hz, 1H), 5.65-5.69 (m, 1H), 7.26-7.30 (m, 2H), 7.43-7.47 (m, 2H), 7.55-7.59 (m, 1H), 7.88-7.95 (m, 4H) ppm;  $^{13}C$  NMR (100 MHz,  $CDCl_3$ ) 21.8, 43.9, 69.9, 128.3, 128.7, 128.9, 129.7, 130.9, 133.6, 136.7, 145.1, 197.1, 200.4 ppm; HRMS (ESI-TOF) calcd for  $C_{17}H_{16}O_3$  ( $[M-H]^+$ ) = 267.1021, Found 267.1026.

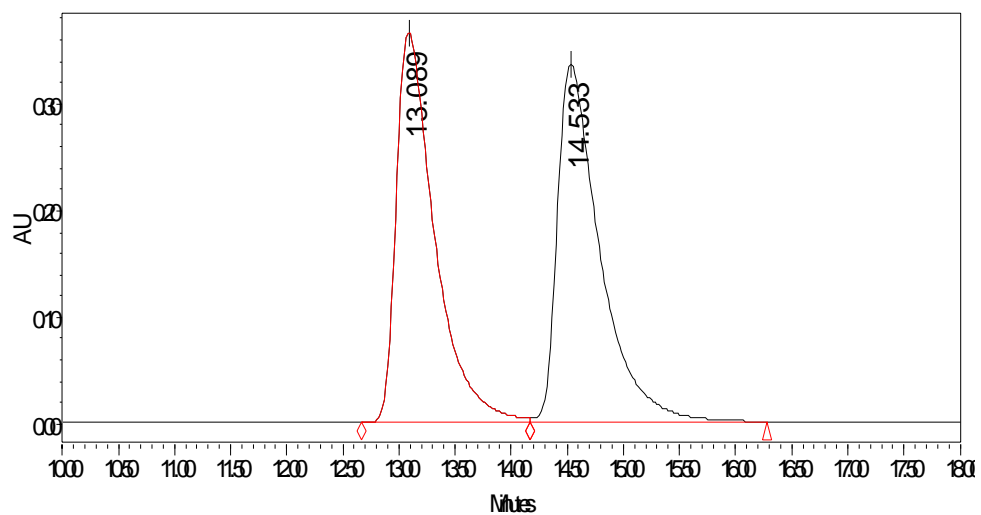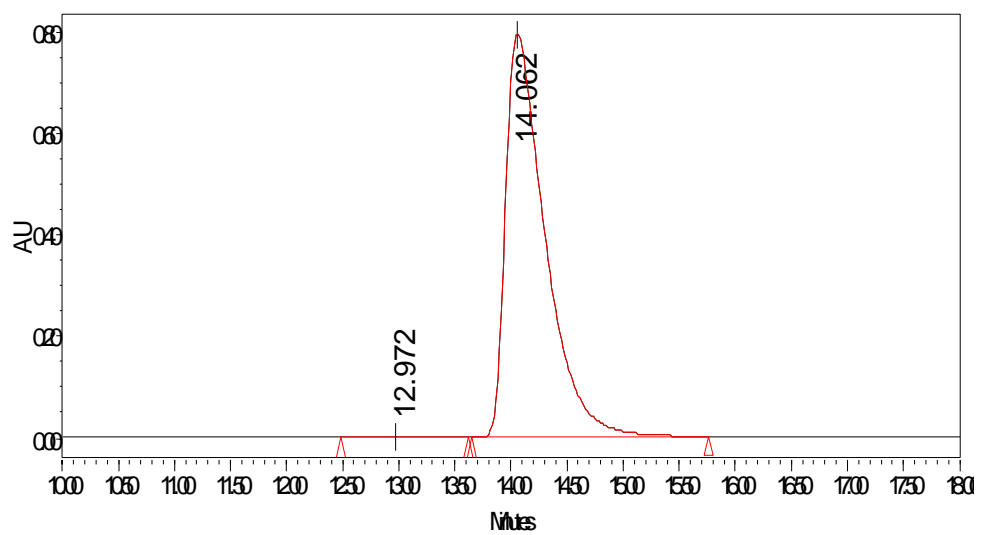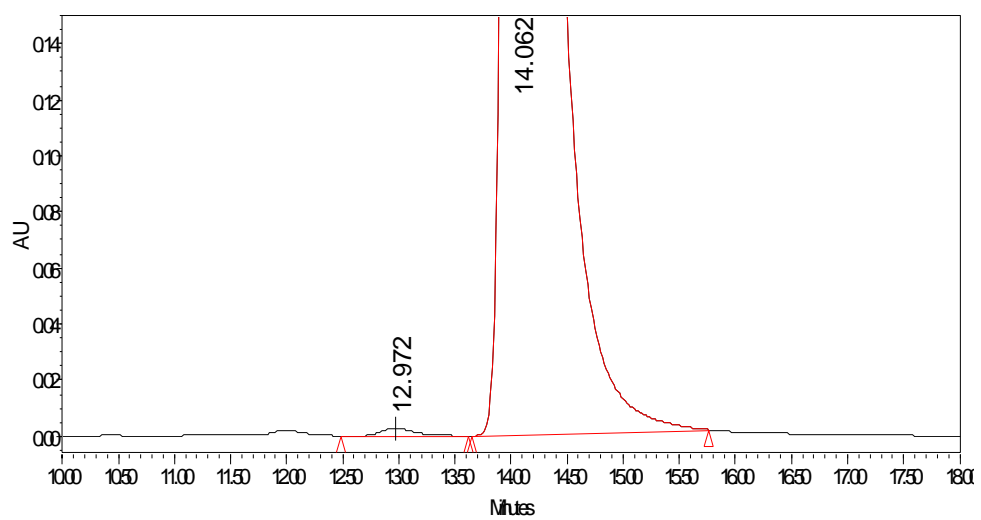

|   | Retention Time | Area     | % Area | Height | % Height | Start Time | End Time |
|---|----------------|----------|--------|--------|----------|------------|----------|
| 1 | 12.972         | 54950    | 0.28   | 2726   | 0.34     | 12.483     | 13.617   |
| 2 | 14.062         | 19629386 | 99.72  | 797618 | 99.66    | 13.650     | 15.767   |

## 2-hydroxy-1-(3-methoxyphenyl)-4-phenylbutane-1,4-dione (5e)

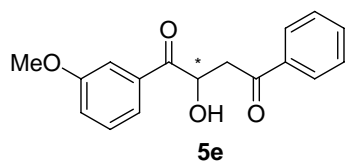

(**C<sub>17</sub>H<sub>16</sub>O<sub>4</sub>**) a colourless viscous liquid; 92% yield, 99% ee.  $[\alpha]_D^{25} = +26.1$  (*c*

0.430 in CH<sub>2</sub>Cl<sub>2</sub>) HPLC DAICEL CHIRALCEL OJ-H, 2-propanol/*n*-hexane

= 20/80, flow rate = 1.0 mL/min,  $\lambda = 254$  nm, retention time: 21.8 min

(minor) and 24.0 min (major); <sup>1</sup>H NMR (400 MHz, CDCl<sub>3</sub>) 3.40-3.44 (m, 2H), 3.86 (s, 3H), 4.01 (d, *J* =

6.0 Hz, 1H), 5.63-5.68 (m, 1H), 7.14-7.17 (m, 1H), 7.38-7.47 (m, 3H), 7.52-7.59 (m, 3H), 7.91-7.94 (m,

2H) ppm; <sup>13</sup>C NMR (100 MHz, CDCl<sub>3</sub>) 43.7, 55.5, 70.2, 113.0, 120.5, 121.1, 128.3, 128.7, 130.0, 133.6,

134.9, 136.6, 160.0, 197.1, 200.6 ppm; HRMS (ESI-TOF) calcd for C<sub>17</sub>H<sub>16</sub>O<sub>4</sub> ([M+H<sup>+</sup>]) = 285.1121,

Found 285.1128.

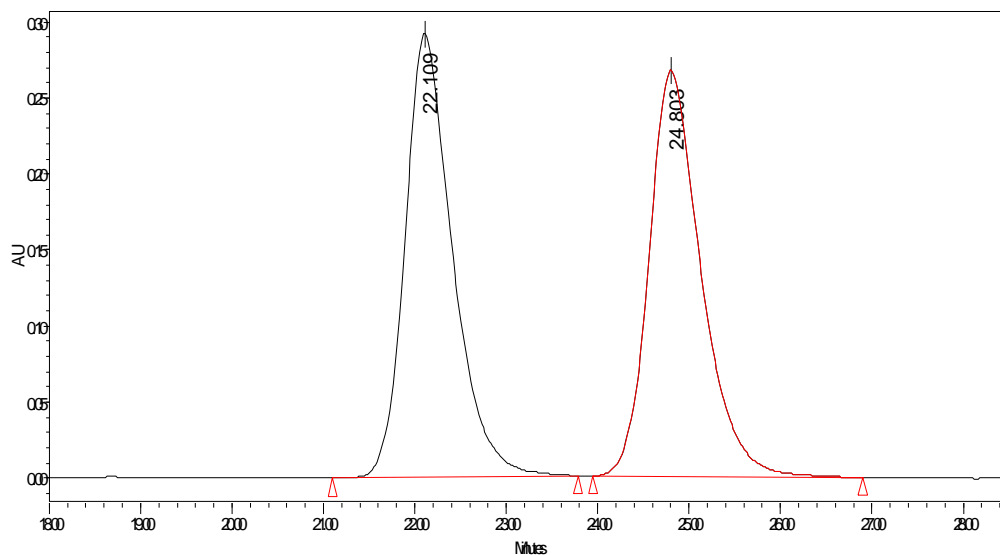



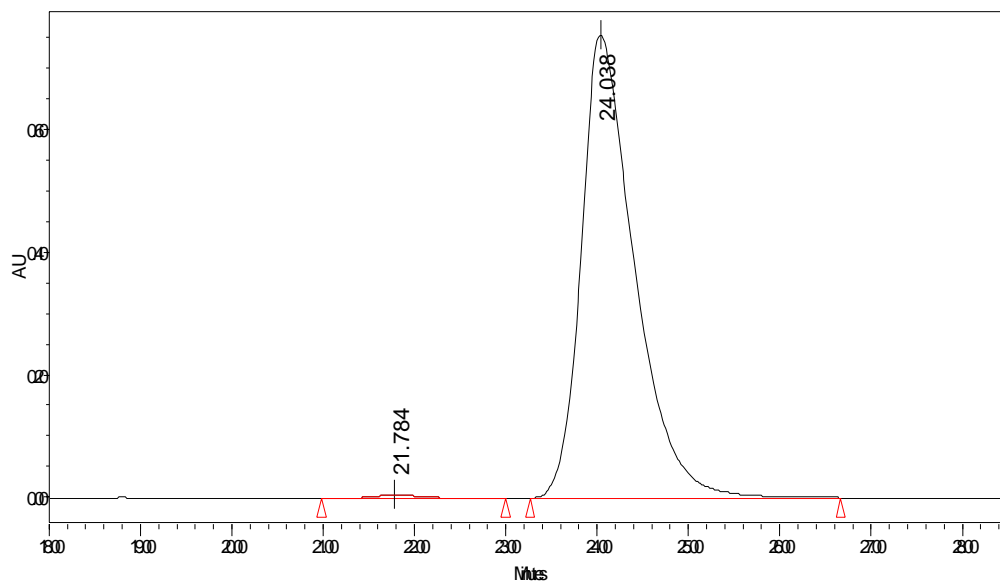

|   | Retention Time | Area     | % Area | Height | % Height | Start Time | End Time |
|---|----------------|----------|--------|--------|----------|------------|----------|
| 1 | 21.784         | 207584   | 0.67   | 5783   | 0.76     | 20.983     | 23.067   |
| 2 | 24.038         | 30720259 | 99.33  | 756626 | 99.24    | 23.083     | 26.817   |

### 2-hydroxy-1-(4-methoxyphenyl)-4-phenylbutane-1,4-dione (**5f**)

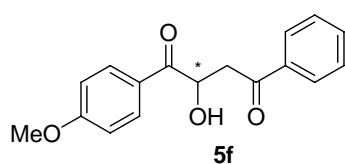

(**C<sub>17</sub>H<sub>16</sub>O<sub>4</sub>**) a white solid; 99% yield, 99% ee.  $[\alpha]_D^{25} = +4.2$  (c 0.480 in CH<sub>2</sub>Cl<sub>2</sub>) HPLC DAICEL CHIRALCEL OJ-H, 2-propanol/*n*-hexane = 10/90, flow rate = 1.0 mL/min,  $\lambda = 254$  nm, retention time: 61.0 min (minor) and

70.8 min (major); <sup>1</sup>H NMR (400 MHz, CDCl<sub>3</sub>) 3.27-3.44 (m, 2H), 3.88 (s, 3H), 4.05 (d, *J* = 6.4 Hz, 1H), 5.64-5.68 (m, 1H), 6.95-6.99 (m, 2H), 7.44-7.47 (m, 2H), 7.55-7.59 (m, 1H), 7.94-8.01 (m, 4H) ppm; <sup>13</sup>C NMR (100 MHz, CDCl<sub>3</sub>) 44.1, 55.6, 69.7, 114.2, 126.2, 128.4, 128.7, 131.2, 133.5, 136.7, 164.2, 197.3, 199.0 ppm; HRMS (ESI-TOF) calcd for C<sub>17</sub>H<sub>16</sub>O<sub>4</sub> ([M+H<sup>+</sup>]) = 285.1121, Found 285.1125.

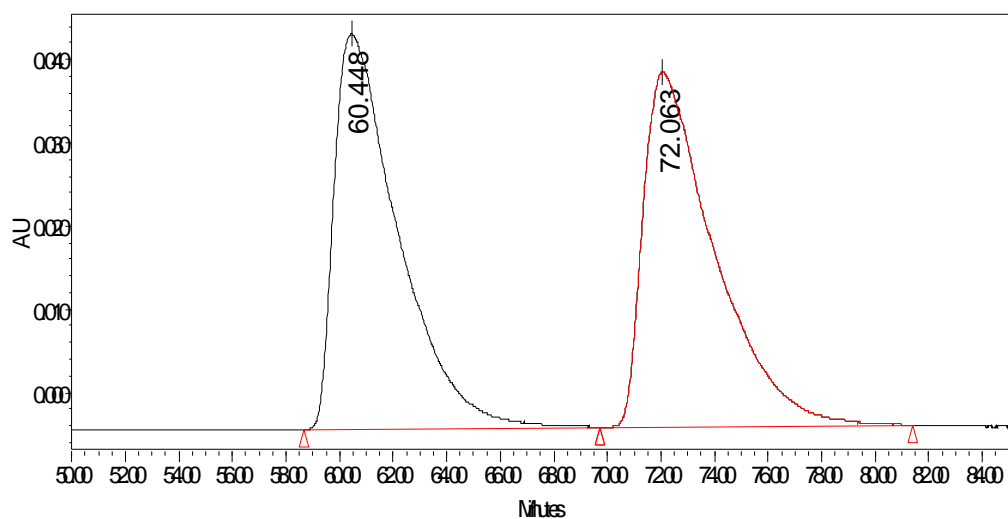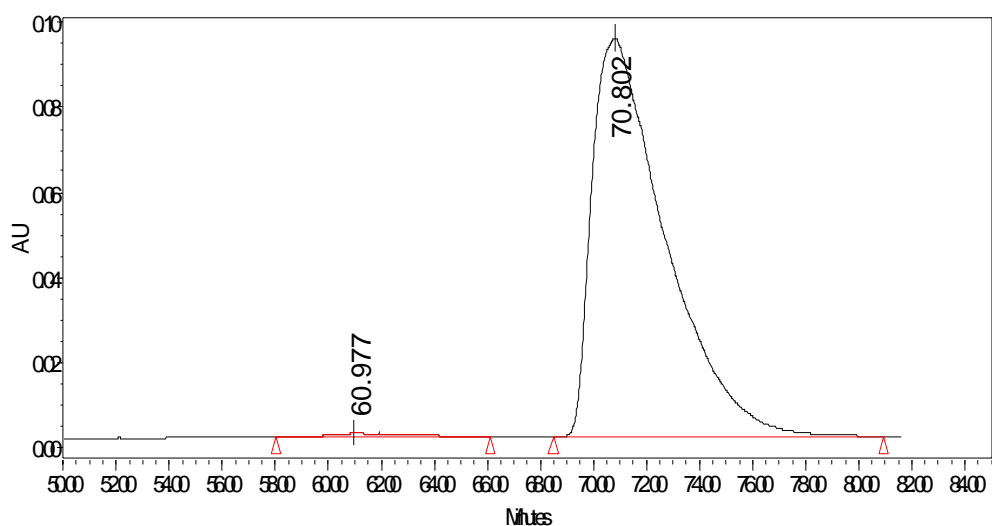

|   | Retention Time | Area     | % Area | Height | % Height | Start Time | End Time |
|---|----------------|----------|--------|--------|----------|------------|----------|
| 1 | 60.977         | 130851   | 0.72   | 742    | 0.78     | 58.033     | 66.117   |
| 2 | 70.802         | 18063773 | 99.28  | 94039  | 99.22    | 68.483     | 80.933   |

### 2-hydroxy-1-(3,4-dimethoxyphenyl)-4-phenylbutane-1,4-dione (5g)

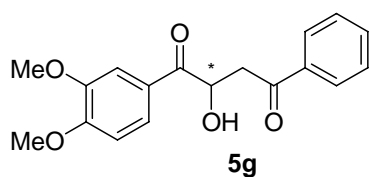

( $C_{18}H_{18}O_5$ ) a white solid; 92% yield, >99% ee.  $[\alpha]_D^{25} = +29.1$  ( $c$  0.460 in  $CH_2Cl_2$ ) HPLC DAICEL CHIRALCEL OJ-H, 2-propanol/ $n$ -hexane = 25/85, flow rate = 1.0 mL/min,  $\lambda = 254$  nm, retention time: 33.5 min

(minor) and 43.9 min (major);  $^1\text{H}$  NMR (400 MHz,  $\text{CDCl}_3$ ) 3.30-3.46 (m, 2H), 3.94(s, 6H), 4.03 (d,  $J = 5.2$  Hz, 1H), 5.69 (s, 1H), 6.89-6.92 (m, 1H), 7.44-7.48 (m, 2H), 7.55-7.64 (m, 3H), 7.93-7.96 (m, 2H) ppm;  $^{13}\text{C}$  NMR (100 MHz,  $\text{CDCl}_3$ ) 44.3, 56.1, 56.2, 69.6, 110.3, 110.8, 123.5, 126.3, 128.3, 128.7, 133.6, 136.7, 149.4, 154.1, 197.4, 199.1 ppm; HRMS (ESI-TOF) calcd for  $\text{C}_{18}\text{H}_{18}\text{O}_5$  ( $[\text{M}+\text{H}^+]$ ) = 315.1227, Found 315.1237.

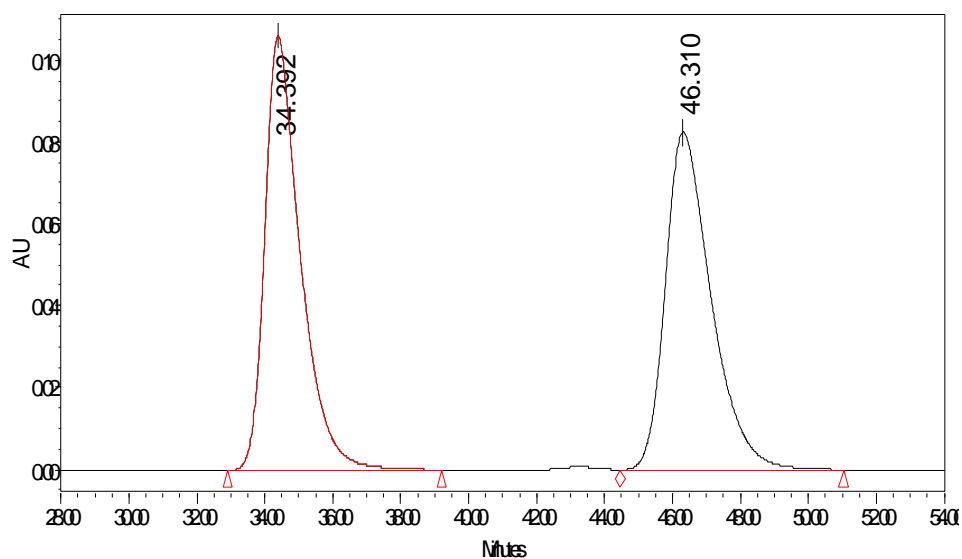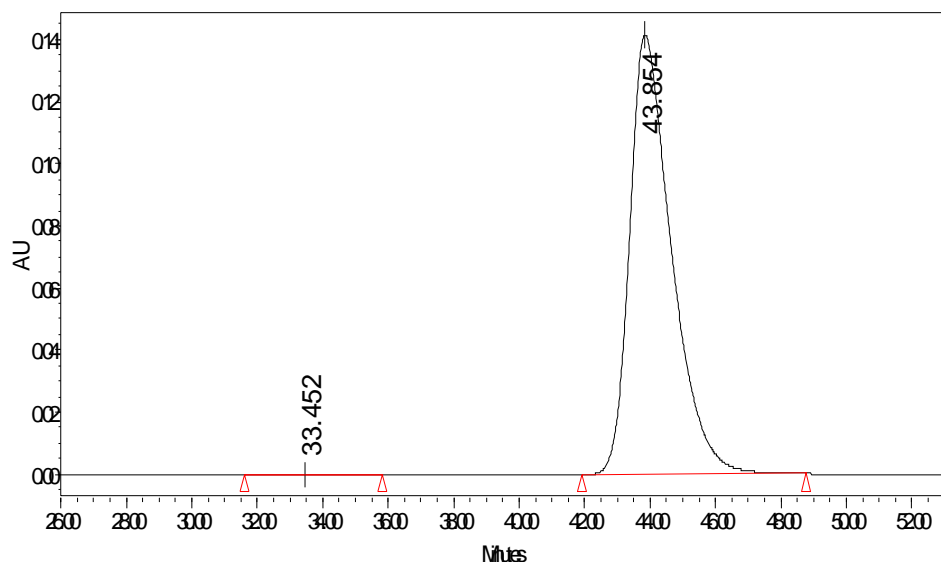

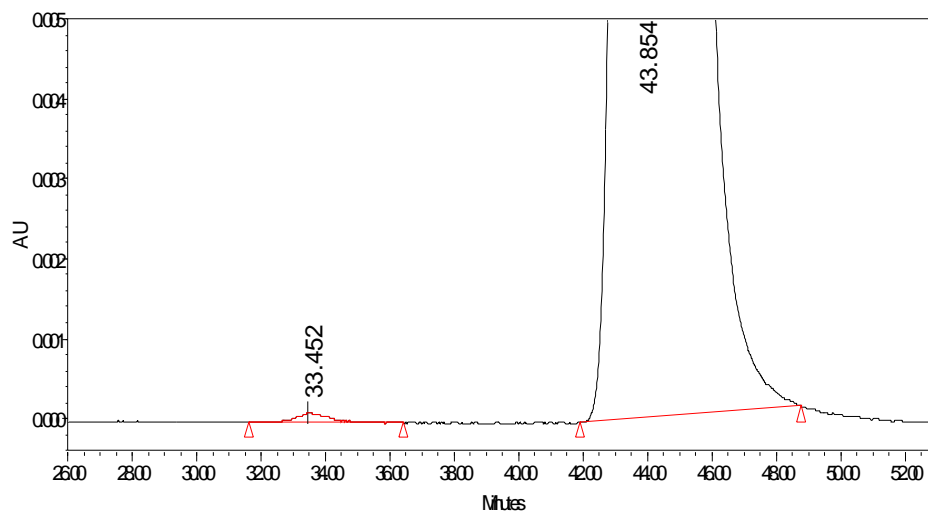

|   | Retention Time | Area     | % Area | Height | % Height | Start Time | End Time |
|---|----------------|----------|--------|--------|----------|------------|----------|
| 1 | 33.452         | 7651     | 0.06   | 110    | 0.08     | 31.617     | 36.100   |
| 2 | 43.854         | 12544045 | 99.94  | 141544 | 99.92    | 41.917     | 48.767   |

### 1-(3-chlorophenyl)-2-hydroxy-4-phenylbutane-1,4-dione (**5h**)

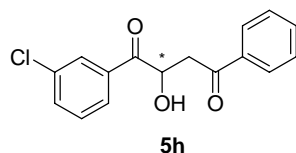

( $C_{16}H_{13}ClO_3$ ) a white solid; 87% yield, 99% ee.  $[\alpha]_D^{25} = +28.0$  (c 0.210 in  $CH_2Cl_2$ ) HPLC DAICEL CHIRALCEL OJ-H, 2-propanol/*n*-hexane = 10/90,

flow rate = 1.0 mL/min,  $\lambda = 254$  nm, retention time: 27.5 min (minor) and 30.1 min (major);  $^1H$  NMR (400 MHz,  $CDCl_3$ ) 3.39-3.50 (m, 2H), 4.01 (d,  $J = 5.2$  Hz, 1H), 5.54-5.57 (m, 1H), 7.41-7.51 (m, 3H), 7.56-7.61 (m, 2H), 7.86-7.89 (m, 1H), 7.93-8.00 (m, 3H) ppm;  $^{13}C$  NMR (100 MHz,  $CDCl_3$ ) 42.9, 70.5, 126.9, 128.3, 128.7, 128.9, 130.2, 133.8, 135.3, 135.5, 136.5, 197.5, 199.5 ppm; HRMS (ESI-TOF) calcd for  $C_{16}H_{13}ClO_3$  ( $[M+Na^+]$ ) = 311.0445, Found 311.0452.

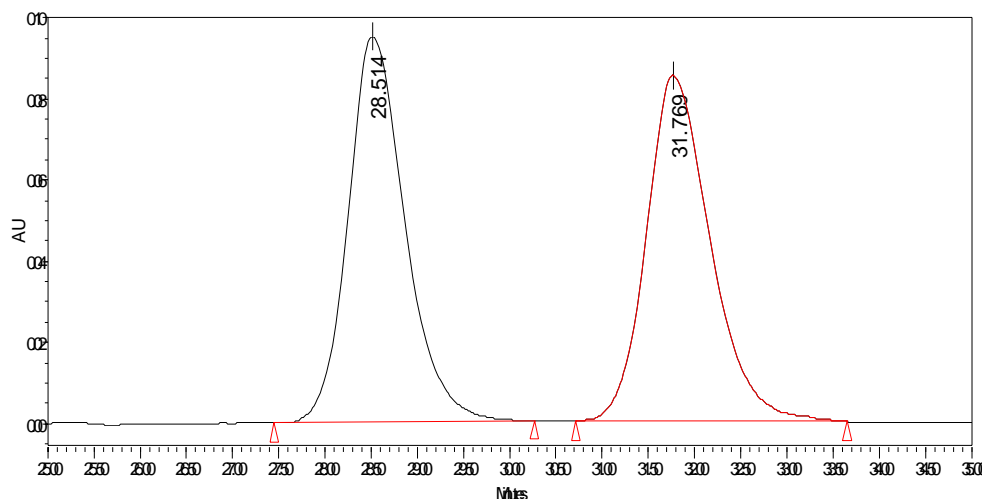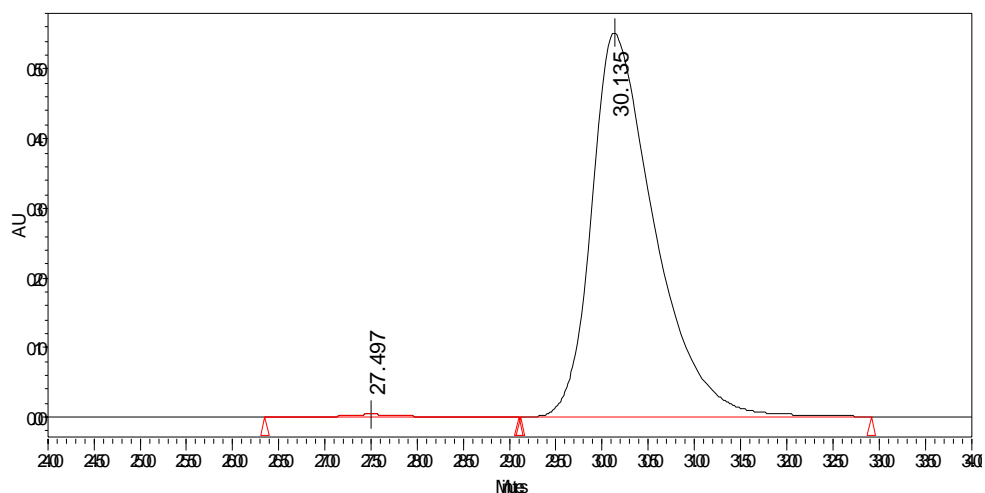

|   | Retention Time | Area     | % Area | Height | % Height | Start Time | End Time |
|---|----------------|----------|--------|--------|----------|------------|----------|
| 1 | 27.497         | 148782   | 0.57   | 3636   | 0.65     | 26.350     | 29.100   |
| 2 | 30.135         | 25984210 | 99.43  | 552308 | 99.35    | 29.117     | 32.917   |

### 1-(4-chlorophenyl)-2-hydroxy-4-phenylbutane-1,4-dione (**5i**)

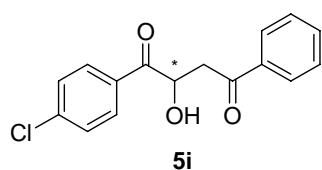

( $C_{16}H_{13}ClO_3$ ) a white solid; 92% yield, 99% ee.  $[\alpha]_D^{25} = +4.5$  (c 0.210 in  $CH_2Cl_2$ ) HPLC DAICEL CHIRALCEL IB, 2-propanol/*n*-hexane = 5/95, flow

rate = 1.0 mL/min,  $\lambda = 254$  nm, retention time: 23.1 min (minor) and 24.0 min (major);  $^1\text{H}$  NMR (400 MHz,  $\text{CDCl}_3$ ) 3.35-3.49 (m, 2H), 4.02 (d,  $J = 6.0$  Hz, 1H), 5.57-5.60 (m, 1H), 7.42-7.53 (m, 4H), 7.56-7.61 (m, 1H), 7.93-8.03 (m, 4H) ppm;  $^{13}\text{C}$  NMR (100 MHz,  $\text{CDCl}_3$ ) 43.1, 70.3, 128.3, 128.7, 129.4, 130.2, 132.2, 133.7, 136.5, 140.4, 197.5, 199.5 ppm; HRMS (ESI-TOF) calcd for  $\text{C}_{16}\text{H}_{13}\text{ClO}_3$  ( $[\text{M}+\text{Na}^+]$ ) = 311.0445, Found 311.0446.

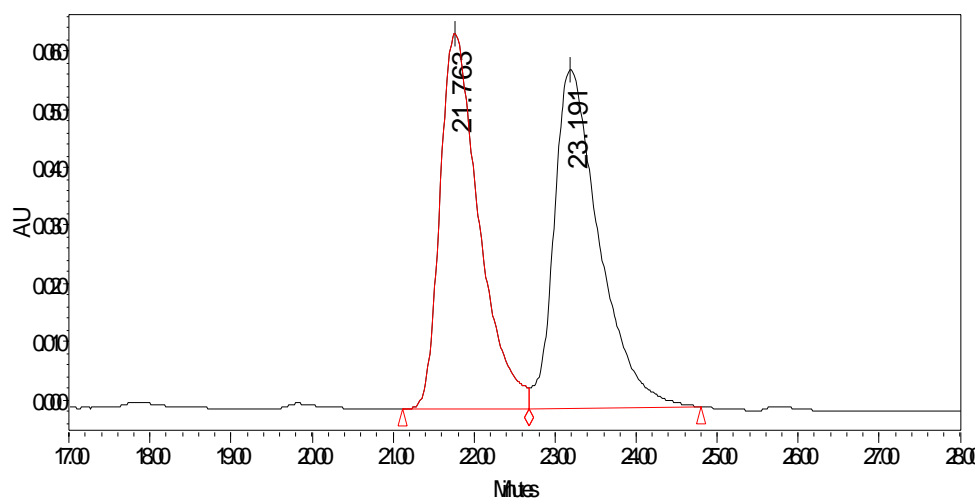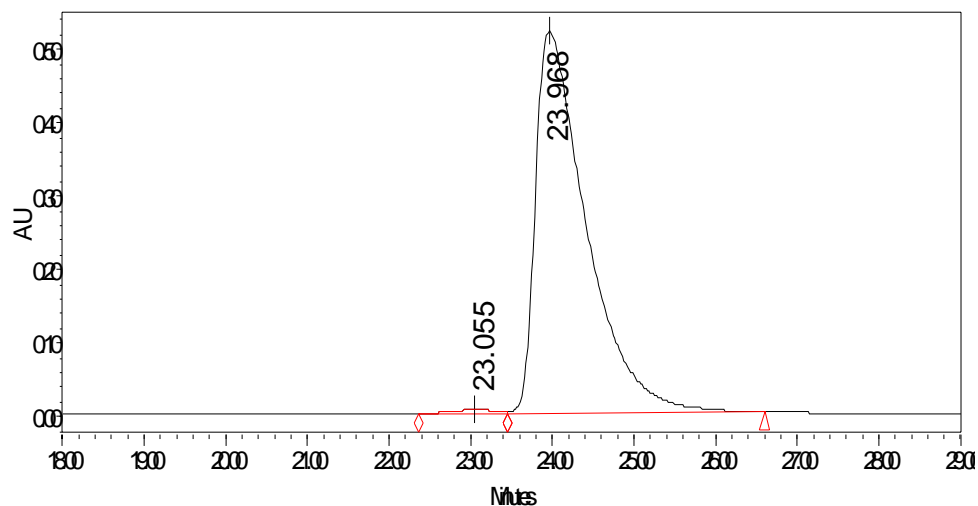

|   | Retention Time | Area     | % Area | Height | % Height | Start Time | End Time |
|---|----------------|----------|--------|--------|----------|------------|----------|
| 1 | 23.055         | 151042   | 0.67   | 4042   | 0.77     | 22.367     | 23.450   |
| 2 | 23.968         | 22470433 | 99.33  | 519280 | 99.23    | 23.450     | 26.600   |

### 1-(3,4-dichlorophenyl)-2-hydroxy-4-phenylbutane-1,4-dione (5j)

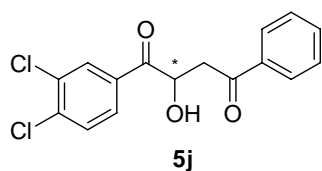

( $C_{16}H_{12}Cl_2O_3$ ) a white solid; 85% yield, 98% ee.  $[\alpha]_D^{25} = +14.2$  ( $c$  0.272 in  $CH_2Cl_2$ ) HPLC DAICEL CHIRALCEL IB, 2-propanol/ $n$ -hexane = 5/95, flow rate = 1.0 mL/min,  $\lambda = 254$  nm, retention time: 29.0 min (minor) and 30.3 min

(major);  $^1H$  NMR (400 MHz,  $CDCl_3$ ) 3.42-3.55 (m, 2H), 4.01 (d,  $J = 3.6$  Hz, 1H), 5.48 (s, 1H), 7.46-7.48 (m, 2H), 7.56-7.62 (m, 2H), 7.84-7.86 (m, 1H), 7.94-7.97 (m, 2H), 8.11-8.13 (m, 1H) ppm;

$^{13}C$  NMR (100 MHz,  $CDCl_3$ ) 42.6, 70.7, 127.9, 128.3, 128.8, 130.8, 130.9, 133.7, 133.9, 136.3, 197.8, 198.5 ppm; HRMS (ESI-TOF) calcd for  $C_{16}H_{12}Cl_2O_3$  ( $[M+Na^+]$ ) = 345.0056, Found 345.0057.

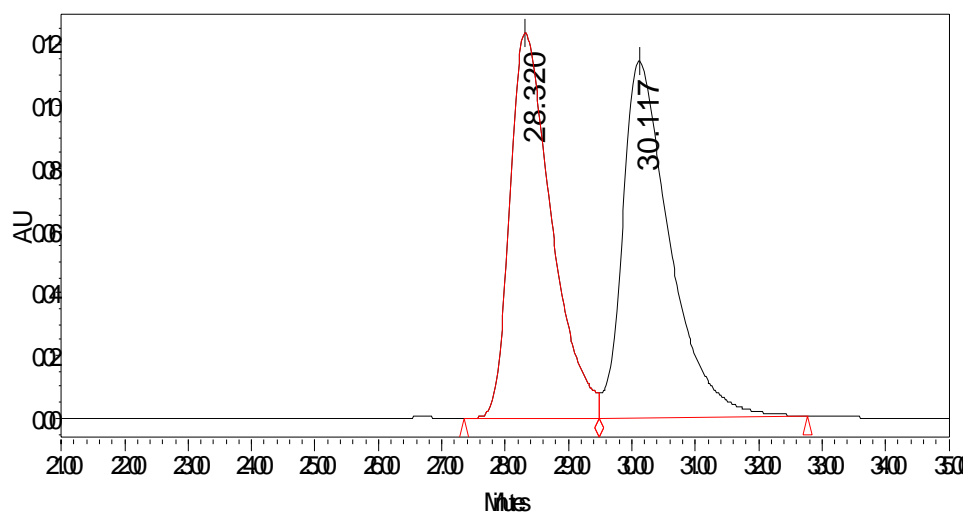

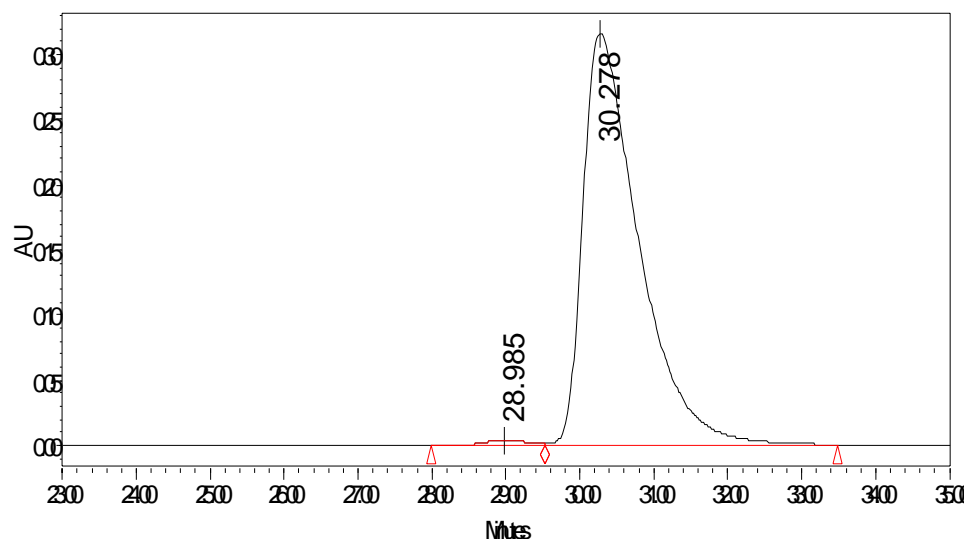

|   | Retention Time | Area     | % Area | Height | % Height | Start Time | End Time |
|---|----------------|----------|--------|--------|----------|------------|----------|
| 1 | 28.985         | 176555   | 1.05   | 4238   | 1.32     | 27.983     | 29.533   |
| 2 | 30.278         | 16589919 | 98.95  | 316211 | 98.68    | 29.533     | 33.483   |

### 1-(4-fluorophenyl)-2-hydroxy-4-phenylbutane-1,4-dione (**5k**)

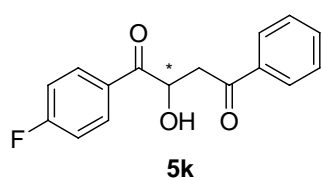

( $C_{16}H_{13}FO_3$ ) a white solid; 91% yield, 99% ee.  $[\alpha]_D^{25} = +30.1$  ( $c$  0.212 in  $CH_2Cl_2$ ) HPLC DAICEL CHIRALCEL OJ-H, 2-propanol/*n*-hexane = 10/90, flow rate = 1.0 mL/min,  $\lambda = 254$  nm, retention time: 31.4 min (minor) and

34.9 min (major);  $^1H$  NMR (400 MHz,  $CDCl_3$ ) 3.34-3.49 (m, 2H), 4.02 (d,  $J = 6.0$  Hz, 1H), 5.60-5.63 (m, 1H), 7.15-7.26 (m, 2H), 7.45-7.49 (m, 2H), 7.53-7.59 (m, 1H), 7.93-7.96 (m, 2H), 8.04-8.08 (m, 2H) ppm;  $^{13}C$  NMR (100 MHz,  $CDCl_3$ ) 42.2, 69.2, 115.1(d,  $J_{CF} = 22$  Hz), 127.3, 127.7, 129.1, 130.5 (d,  $J_{CF} = 10$  Hz), 132.7, 135.5, 165.3 (d,  $J_{CF} = 255$  Hz), 196.5, 198.0 ppm; HRMS (ESI-TOF) calcd for  $C_{16}H_{13}FO_3$  ( $[M+Na^+]$ ) = 295.0741, Found 295.0738.



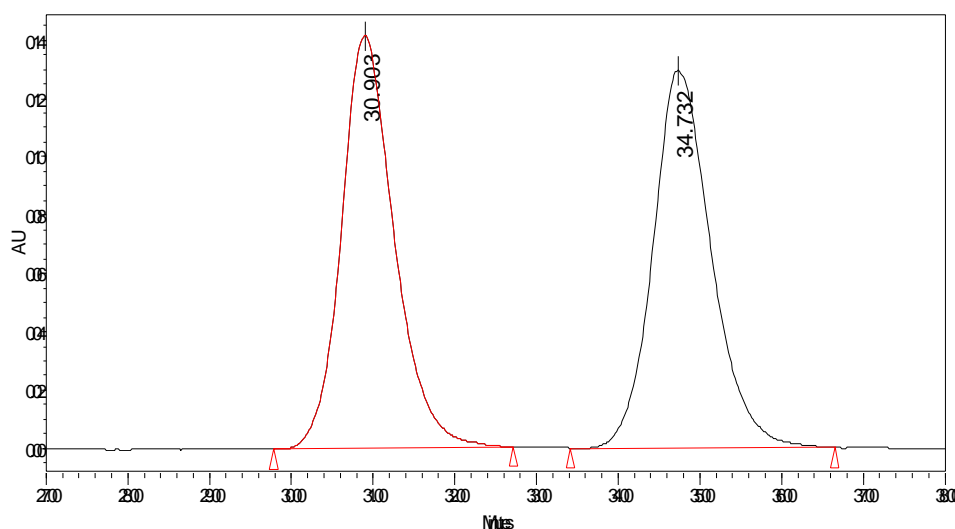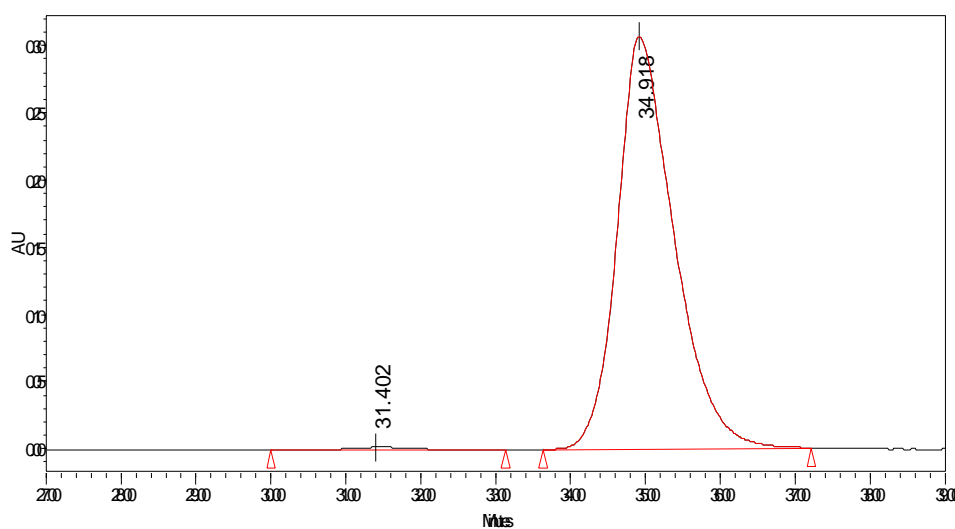

|   | Retention Time | Area     | % Area | Height | % Height | Start Time | End Time |
|---|----------------|----------|--------|--------|----------|------------|----------|
| 1 | 31.402         | 85073    | 0.52   | 1531   | 0.50     | 30.000     | 33.133   |
| 2 | 34.918         | 16184107 | 99.48  | 307230 | 99.50    | 33.633     | 37.217   |

### 1-(4-bromophenyl)-2-hydroxy-4-phenylbutane-1,4-dione (**5I**)

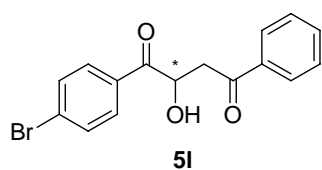

( $C_{16}H_{13}BrO_3$ ) a white solid; 82% yield, 99% ee.  $[\alpha]_D^{25} = -5.0$  ( $c$  0.400 in  $CH_2Cl_2$ ) HPLC DAICEL CHIRALCEL OJ-H, 2-propanol/ $n$ -hexane = 15/85, flow rate = 1.0 mL/min,  $\lambda = 254$  nm, retention time: 23.4 min (minor) and

26.5 min (major);  $^1\text{H}$  NMR (400 MHz,  $\text{CDCl}_3$ ) 3.35-3.50 (m, 2H), 4.01 (d,  $J = 6.0$  Hz, 1H), 5.54-5.59 (m, 1H), 7.44-7.48 (m, 2H), 7.56-7.58 (m, 1H), 7.59-7.61 (m, 2H), 7.86-7.89 (m, 2H), 7.90-7.95 (m, 2H) ppm.

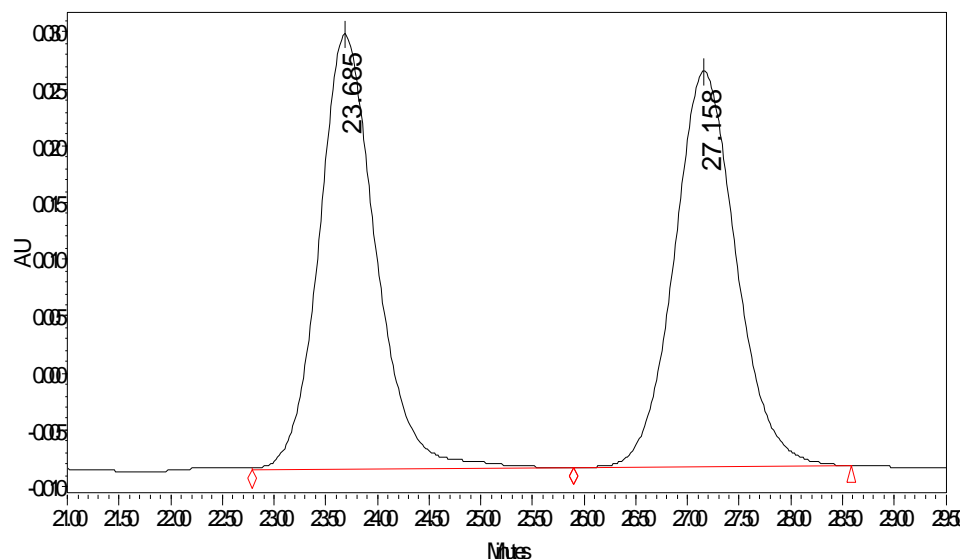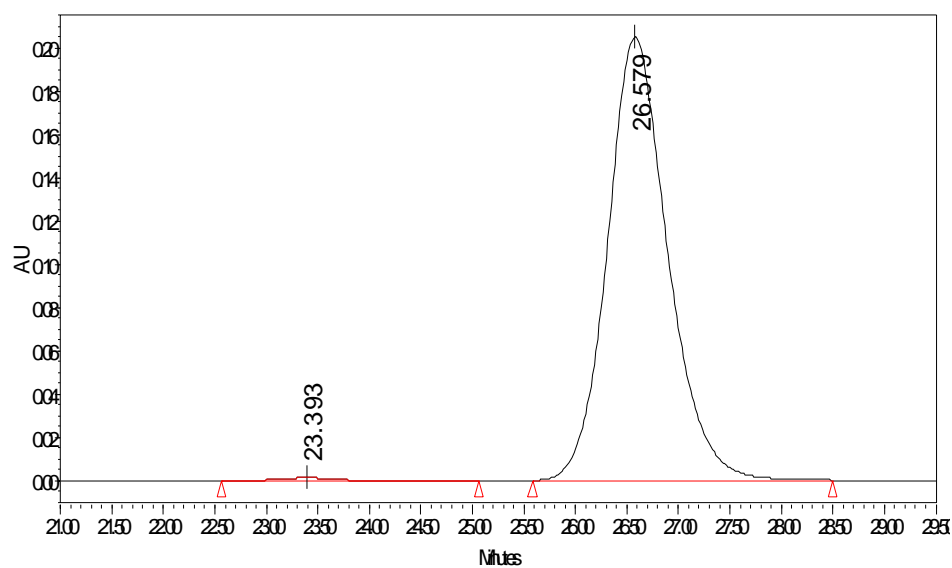

|   | Retention Time | Area    | % Area | Height | % Height | Start Time | End Time |
|---|----------------|---------|--------|--------|----------|------------|----------|
| 1 | 23.393         | 50205   | 0.60   | 1347   | 0.65     | 22.567     | 25.067   |
| 2 | 26.579         | 8321552 | 99.40  | 204945 | 99.35    | 25.583     | 28.500   |

**2-hydroxy-1-(3-nitrophenyl)-4-phenylbutane-1,4-dione (5m)**

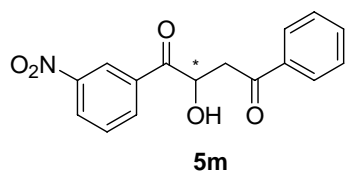

(**C<sub>16</sub>H<sub>13</sub>NO<sub>5</sub>**) a colourless viscous liquid; 80% yield, >99% ee.  $[\alpha]_D^{25} = +17.6$

(*c* 0.340 in CH<sub>2</sub>Cl<sub>2</sub>) HPLC DAICEL CHIRALCEL AS-H,

2-propanol/*n*-hexane = 15/85, flow rate = 1.0 mL/min,  $\lambda = 254$  nm, retention

time: 68.4min (minor) and 72.6 min (major); <sup>1</sup>H NMR (400 MHz, CDCl<sub>3</sub>) 3.56-3.58 (m, 2H), 4.11 (d, *J*

= 6.8 Hz, 1H), 5.46-5.53 (m, 1H), 7.46-7.50 (m, 2H), 7.60-7.69 (m, 1H), 7.71-7.73 (m, 1H), 7.95-7.96

(m, 2H), 8.36-8.39 (m, 1H), 8.42-8.45 (m, 1H), 8.89 (s, 1H) ppm; <sup>13</sup>C NMR (100 MHz, CDCl<sub>3</sub>) 42.1,

71.3, 123.9, 127.7, 128.3, 128.8, 130.0, 134.0, 134.6, 135.9, 136.3, 148.5, 198.3, 198.5 ppm; HRMS

(ESI-TOF) calcd for C<sub>16</sub>H<sub>13</sub>NO<sub>5</sub> ([M+Na<sup>+</sup>]) = 322.0686, Found 322.0695.

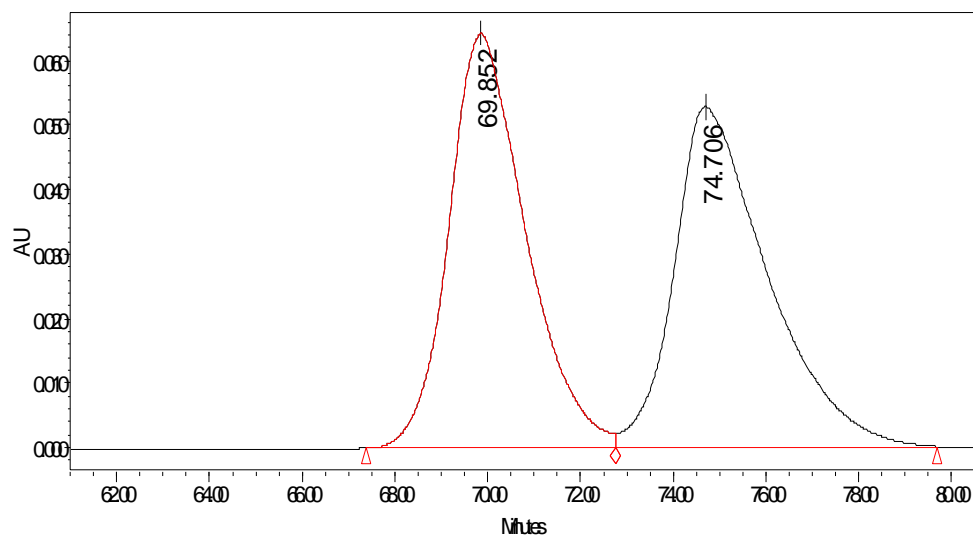

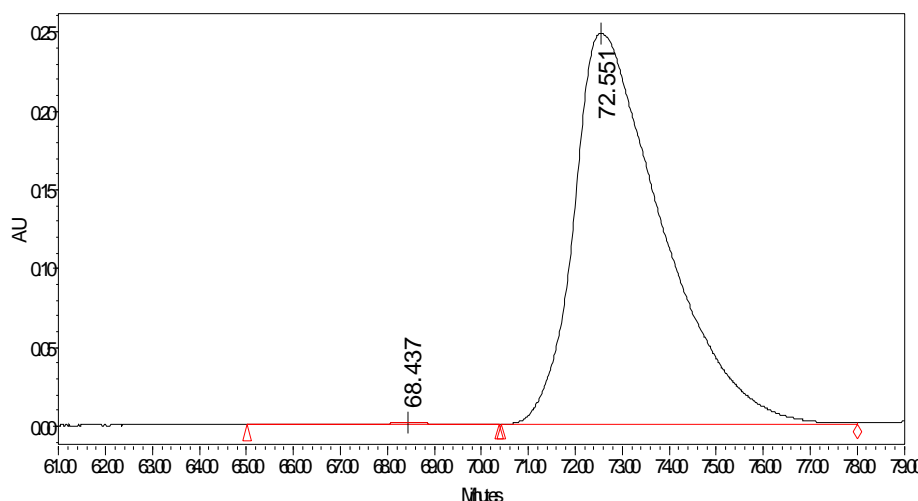

|   | Retention Time | Area     | % Area | Height | % Height | Start Time | End Time |
|---|----------------|----------|--------|--------|----------|------------|----------|
| 1 | 68.437         | 87204    | 0.27   | 905    | 0.36     | 65.017     | 70.383   |
| 2 | 72.551         | 32587128 | 99.73  | 248212 | 99.64    | 70.433     | 78.000   |

### 2-hydroxy-1-(4-nitrophenyl)-4-phenylbutane-1,4-dione (**5n**)

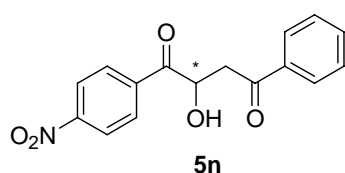

(**C<sub>16</sub>H<sub>13</sub>NO<sub>5</sub>**) a white solid; 72% yield, 99% ee.  $[\alpha]_D^{25} = +5.8$  (*c* 0.160 in  $\text{CH}_2\text{Cl}_2$ ) HPLC DAICEL CHIRALCEL IB, 2-propanol/*n*-hexane = 10/90, flow rate = 1.0 mL/min,  $\lambda = 254$  nm, retention time: 34.4 min (minor) and

36.2 min (major);  $^1\text{H}$  NMR (400 MHz,  $\text{CDCl}_3$ ) 3.53-3.55 (m, 2H), 4.03 (d,  $J = 6.8$  Hz, 1H), 5.47-5.52 (m, 1H), 7.46-7.51 (m, 2H), 7.59-7.63 (m, 1H), 7.94-7.96 (m, 2H), 8.18-8.20 (m, 2H), 8.32-8.35 (m, 1H) ppm;  $^{13}\text{C}$  NMR (100 MHz,  $\text{CDCl}_3$ ) 42.2, 71.3, 123.9, 128.3, 128.8, 130.0, 134.0, 136.2, 139.2, 150.5, 198.1, 199.4 ppm; HRMS (ESI-TOF) calcd for  $\text{C}_{16}\text{H}_{13}\text{NO}_5$  ( $[\text{M}+\text{Na}^+]$ ) = 322.0686, Found 322.0692.

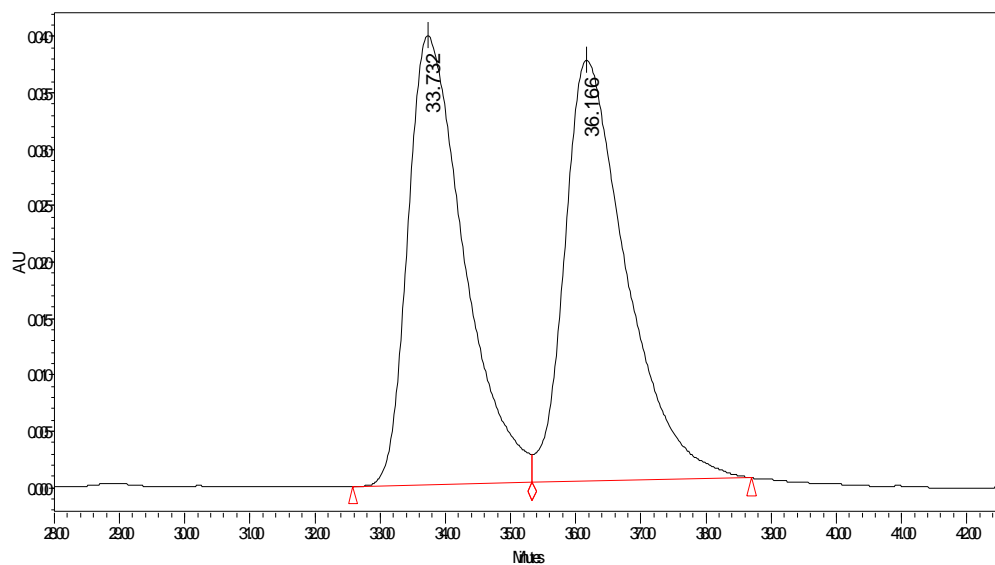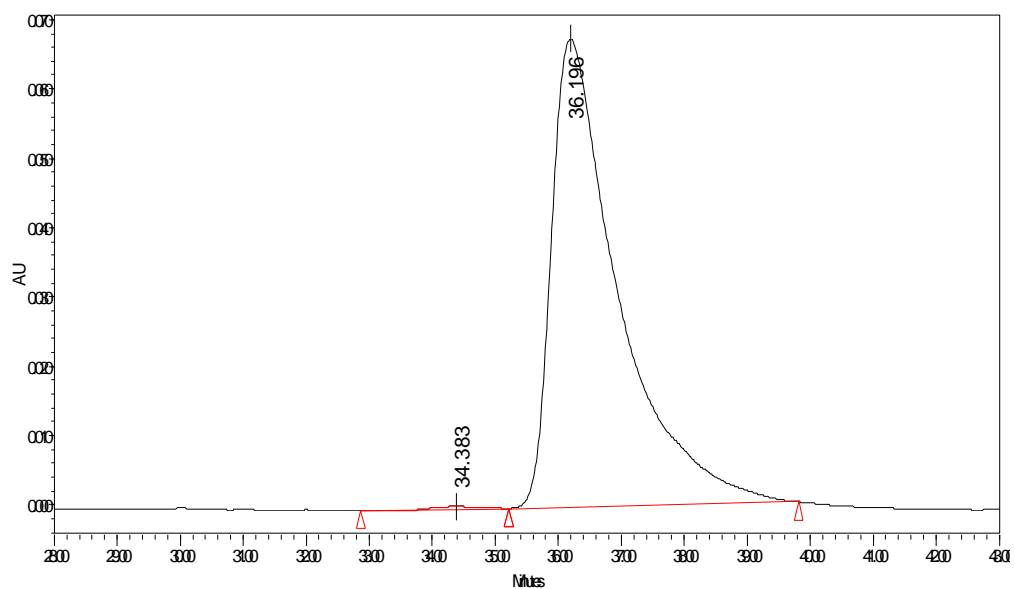

|   | Retention Time | Area    | % Area | Height | % Height | Start Time | End Time |
|---|----------------|---------|--------|--------|----------|------------|----------|
| 1 | 34.383         | 20635   | 0.41   | 393    | 0.58     | 32.867     | 35.217   |
| 2 | 36.196         | 4957682 | 99.59  | 67551  | 99.42    | 35.217     | 39.817   |

**2-hydroxy-1-(naphthalen-2-yl)-4-phenylbutane-1,4-dione (5o)**

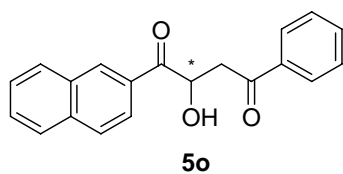

( $C_{20}H_{16}O_3$ ) a white solid; 86% yield, 99% ee.  $[\alpha]_D^{25} = -36.9$  ( $c$  0.260 in  $CH_2Cl_2$ ) HPLC DAICEL CHIRALCEL OJ-H, 2-propanol/ $n$ -hexane = 20/80, flow rate = 1.0 mL/min,  $\lambda = 254$  nm, retention time: 41.6 min (minor) and

45.7 min (major);  $^1H$  NMR (400 MHz,  $CDCl_3$ ) 3.43-3.51 (m, 2H), 4.10 (d,  $J = 4.0$  Hz, 1H), 5.83-5.85 (m, 1H), 7.44-7.46 (m, 2H), 7.55-7.64 (m, 3H), 7.90-8.06 (m, 6H), 8.55 (s, 1H) ppm;  $^{13}C$  NMR (100 MHz,  $CDCl_3$ ) 43.8, 70.2, 124.1, 127.1, 127.9, 128.4, 128.7, 128.9, 129.0, 129.8, 130.7, 130.9, 132.4, 133.6, 135.9, 136.7, 197.3, 200.8 ppm; HRMS (ESI-TOF) calcd for  $C_{20}H_{16}O_3$  ( $[M+H]^+$ ) = 305.1172, Found 305.1180.

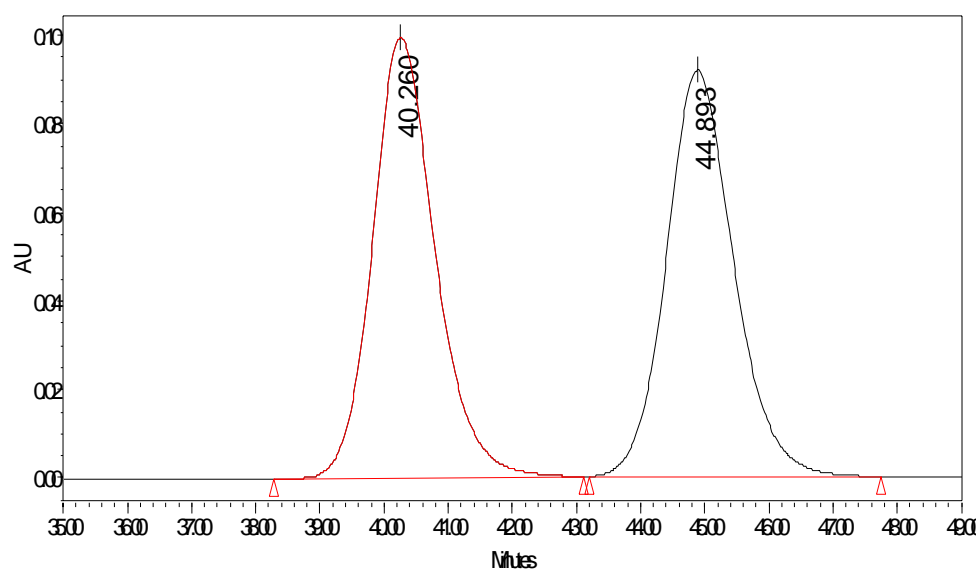

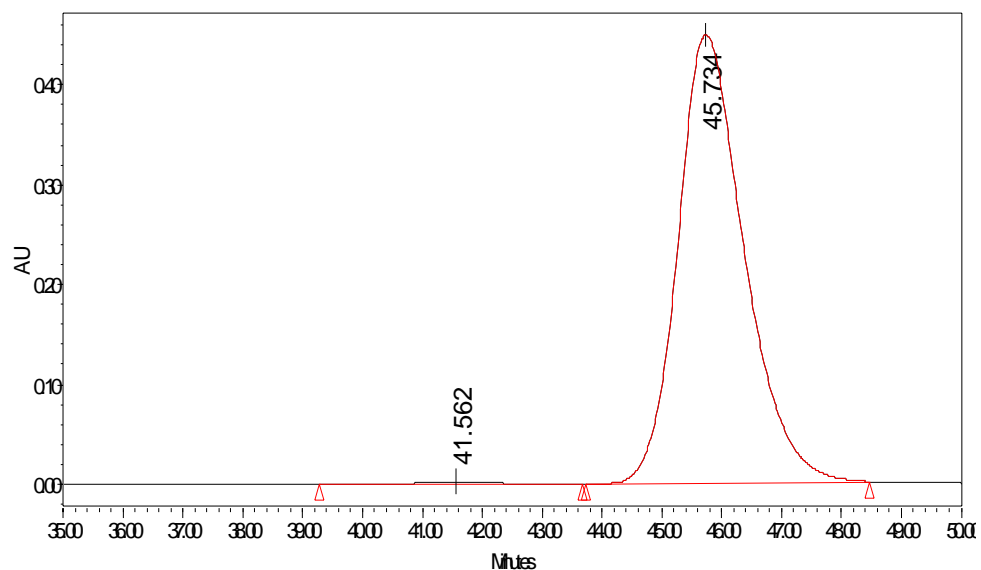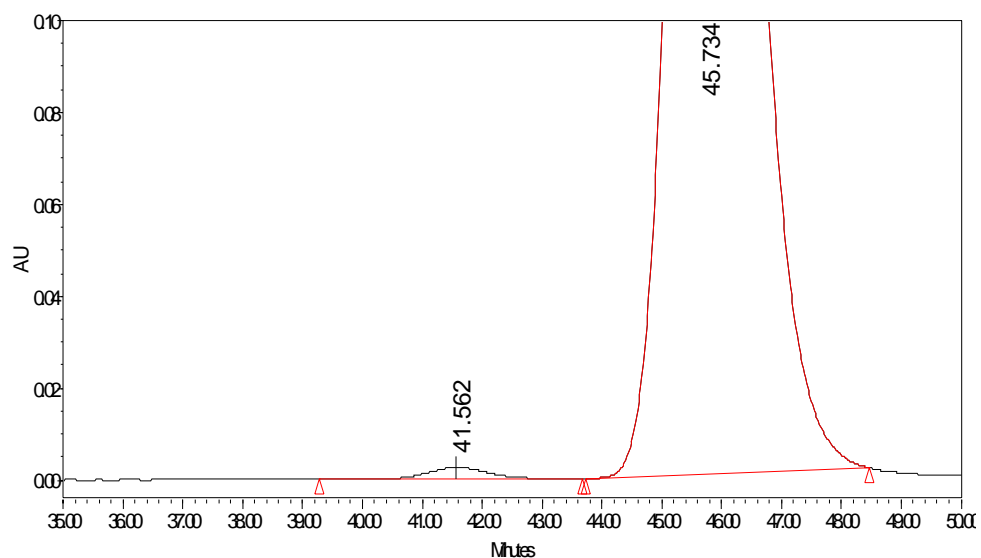

|   | Retention Time | Area     | % Area | Height | % Height | Start Time | End Time |
|---|----------------|----------|--------|--------|----------|------------|----------|
| 1 | 41.562         | 178077   | 0.51   | 2536   | 0.56     | 39.283     | 43.583   |
| 2 | 45.734         | 34574217 | 99.49  | 448607 | 99.44    | 43.733     | 48.767   |

### 1-(furan-2-yl)-2-hydroxy-4-phenylbutane-1,4-dione (5p)

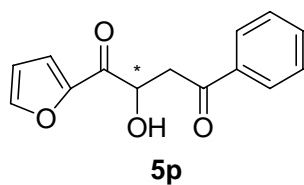

( $C_{14}H_{12}O_4$ ) a white solid; 75% yield, 99% ee.  $[\alpha]_D^{29} = +5.0$  (c 0.180 in  $CH_2Cl_2$ )

HPLC DAICEL CHIRALCEL OJ-H, 2-propanol/*n*-hexane = 15/85, flow rate =

1.0 mL/min,  $\lambda = 254$  nm, retention time: 35.0 min (minor) and 38.3 min (major);  $^1\text{H}$  NMR (400 MHz,  $\text{CDCl}_3$ ) 3.46-3.60 (m, 2H), 3.90 (d,  $J = 6.0$  Hz, 1H), 5.30-5.34 (m, 1H), 6.59-6.60 (m, 1H), 7.45-7.50 (m, 3H), 7.56-7.63 (m, 2H), 7.96-7.98 (m, 2H) ppm;  $^{13}\text{C}$  NMR (100 MHz,  $\text{CDCl}_3$ ) 43.1, 70.8, 112.7, 119.7, 128.3, 128.7, 133.6, 136.5, 147.1, 150.3, 188.8, 197.5 ppm; HRMS (ESI-TOF) calcd for  $\text{C}_{14}\text{H}_{12}\text{O}_4$  ( $[\text{M}+\text{Na}^+]$ ) = 267.0628, Found 67.0656.

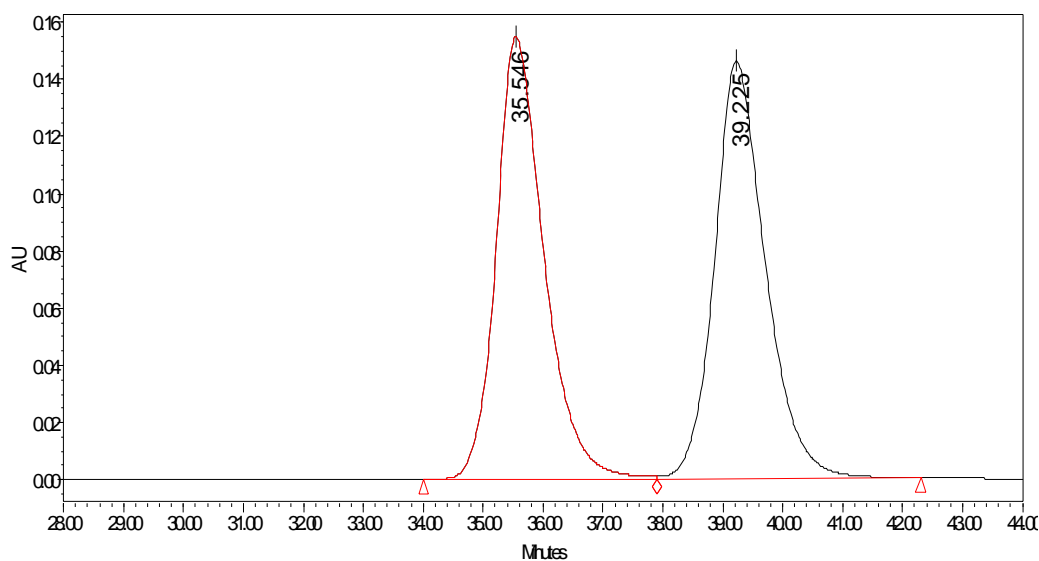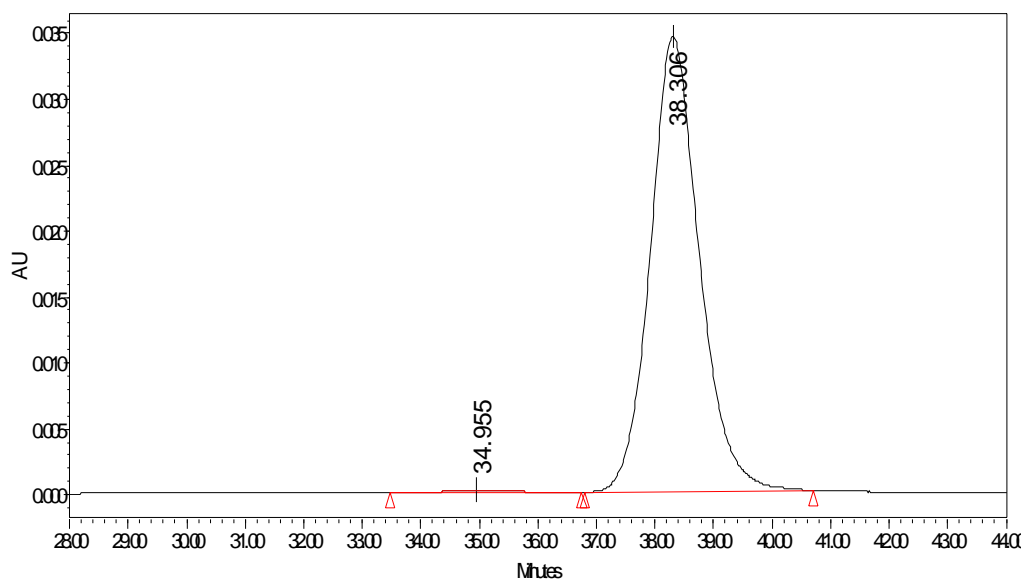



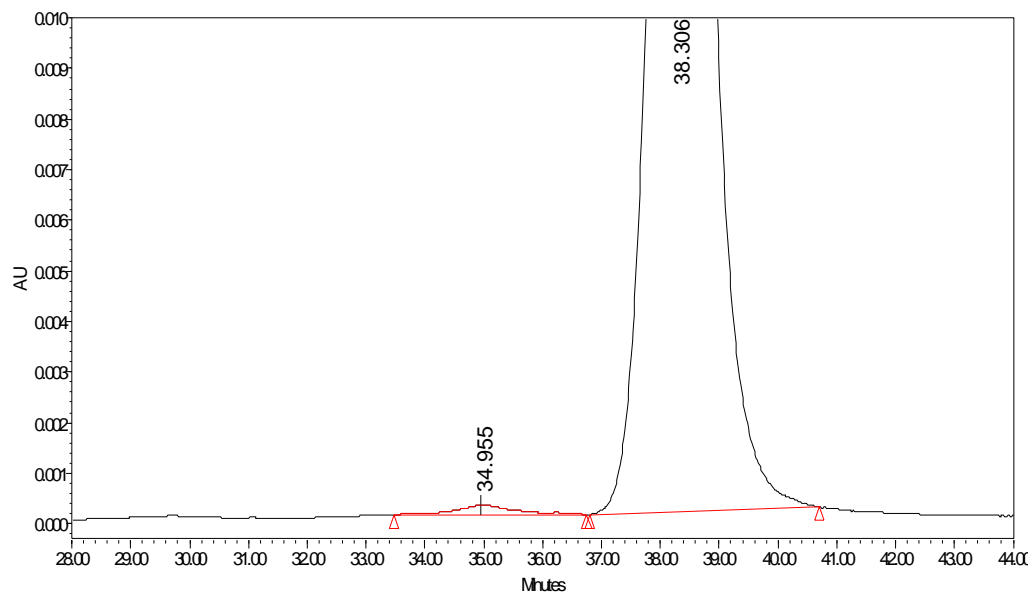

|   | Retention Time | Area    | % Area | Height | % Height | Start Time | End Time |
|---|----------------|---------|--------|--------|----------|------------|----------|
| 1 | 34.955         | 13858   | 0.69   | 194    | 0.56     | 33.467     | 36.750   |
| 2 | 38.306         | 2008563 | 99.31  | 34539  | 99.44    | 36.800     | 40.700   |

### 2-hydroxy-4-phenyl-1-(thiophen-2-yl)butane-1,4-dione (**5q**)

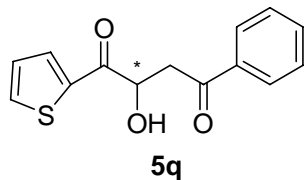

( $C_{14}H_{12}SO_3$ ) a white solid; 86% yield, 98% ee.  $[\alpha]_D^{25} = +58.6$  (*c* 0.380 in

$CH_2Cl_2$ ) HPLC DAICEL CHIRALCEL OJ-H, 2-propanol/*n*-hexane = 10/90,

flow rate = 1.0 mL/min,  $\lambda = 254$  nm, retention time: 44.2 min (minor) and 49.5

min (major);  $^1H$  NMR (400 MHz,  $CDCl_3$ ) 3.43-3.57 (m, 2H), 3.98 (d,  $J = 4.4$  Hz, 1H), 5.41-5.43 (m,

1H), 7.16-7.18 (m, 1H), 7.46-7.49 (m, 2H), 7.58-7.60 (m, 1H), 7.71-7.73 (m, 1H), 7.94-7.97 (m, 3H)

ppm;  $^{13}C$  NMR (100 MHz,  $CDCl_3$ ) 43.7, 71.6, 128.3, 128.4, 128.8, 133.8, 135.0, 136.5, 139.9, 193.1,

198.0 ppm; HRMS (ESI-TOF) calcd for  $C_{14}H_{12}SO_3$  ( $[M+Na^+]$ ) = 283.0399, Found 283.0387.

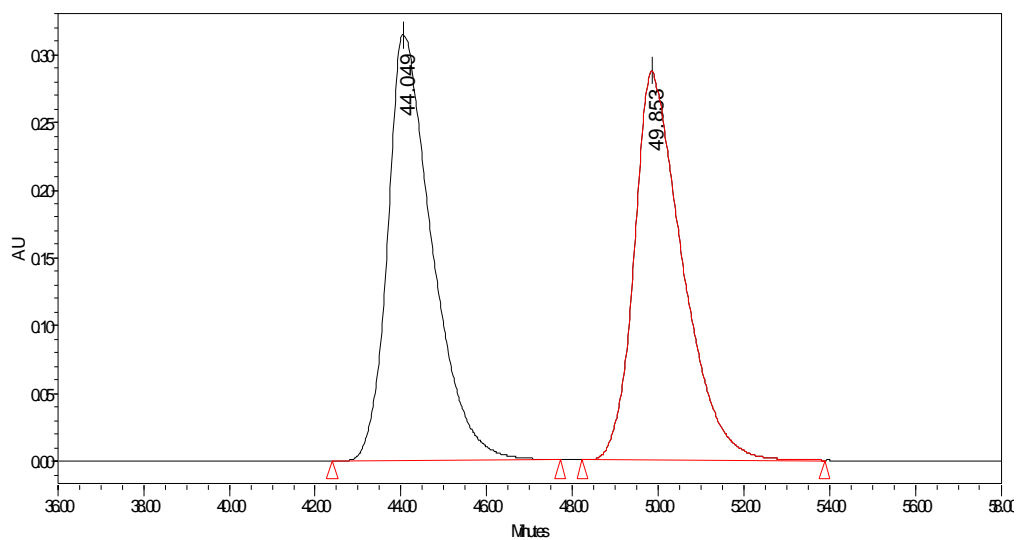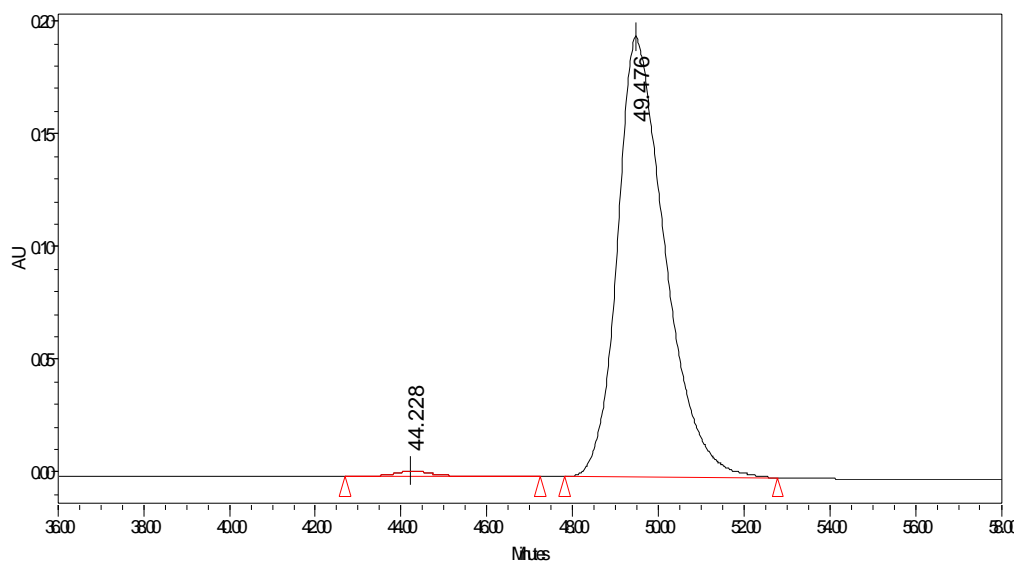

|   | Retention Time | Area     | % Area | Height | % Height | Start Time | End Time |
|---|----------------|----------|--------|--------|----------|------------|----------|
| 1 | 44.228         | 173672   | 1.14   | 2555   | 1.29     | 42.700     | 47.250   |
| 2 | 49.476         | 15103936 | 98.86  | 195580 | 98.71    | 47.817     | 52.783   |

### 1-cyclohexyl-2-hydroxy-4-phenylbutane-1,4-dione (5r)

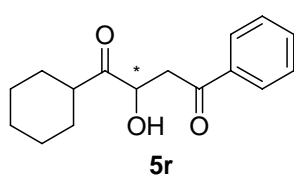

5r

( $C_{16}H_{20}O_3$ ) a white solid; 70% yield, 99% ee.  $[\alpha]_D^{25} = -4.6$  ( $c$  0.258 in  $CH_2Cl_2$ )

HPLC DAICEL CHIRALCEL OJ-H, 2-propanol/*n*-hexane = 10/90, flow rate =

1.0 mL/min,  $\lambda = 254$  nm, retention time: 11.2 min (minor) and 11.9 min (major);

$^1\text{H}$  NMR (400 MHz,  $\text{CDCl}_3$ ) 1.24-1.38 (m, 5H), 1.41-1.52 (m, 1H), 1.59-1.87 (m, 4H), 2.80-2.82 (m, 1H), 3.34-3.54 (m, 2H), 3.82 (d,  $J_1 = 6.8$  Hz, 1H), 4.70-4.71 (m, 1H), 7.26-7.50 (m, 2H), 7.58-7.62 (s, 1H), 7.94-7.97 (m, 2H) ppm;  $^{13}\text{C}$  NMR (100 MHz,  $\text{CDCl}_3$ ) 25.4, 25.7, 25.8, 28.1, 29.2, 41.8, 45.8, 72.0, 128.3, 128.7, 133.7, 136.5, 198.3, 214.5 ppm; HRMS (ESI-TOF) calcd for  $\text{C}_{16}\text{H}_{20}\text{O}_3$  ( $[\text{M}+\text{Na}^+]$ ) = 283.1305, Found 283.1315.

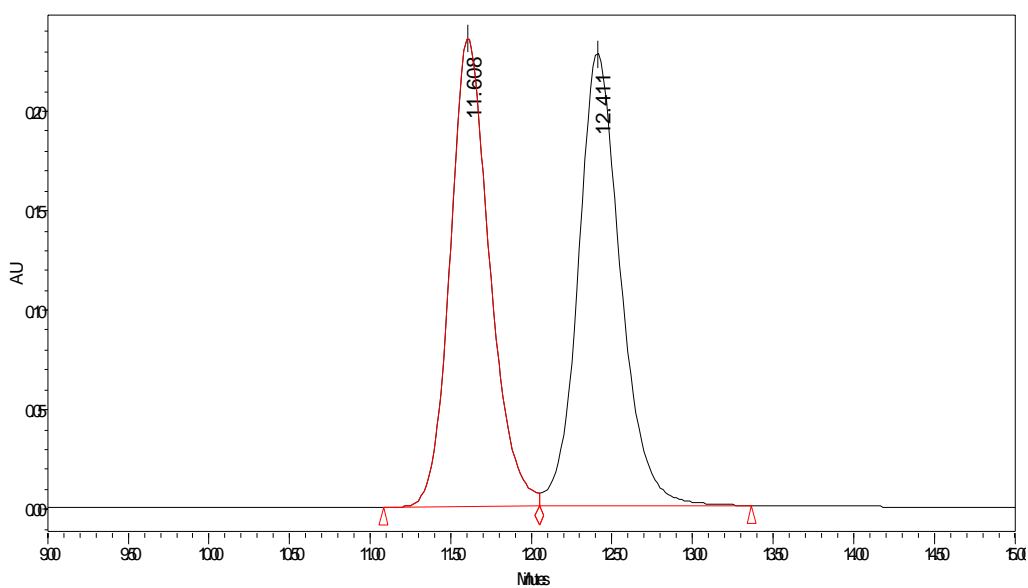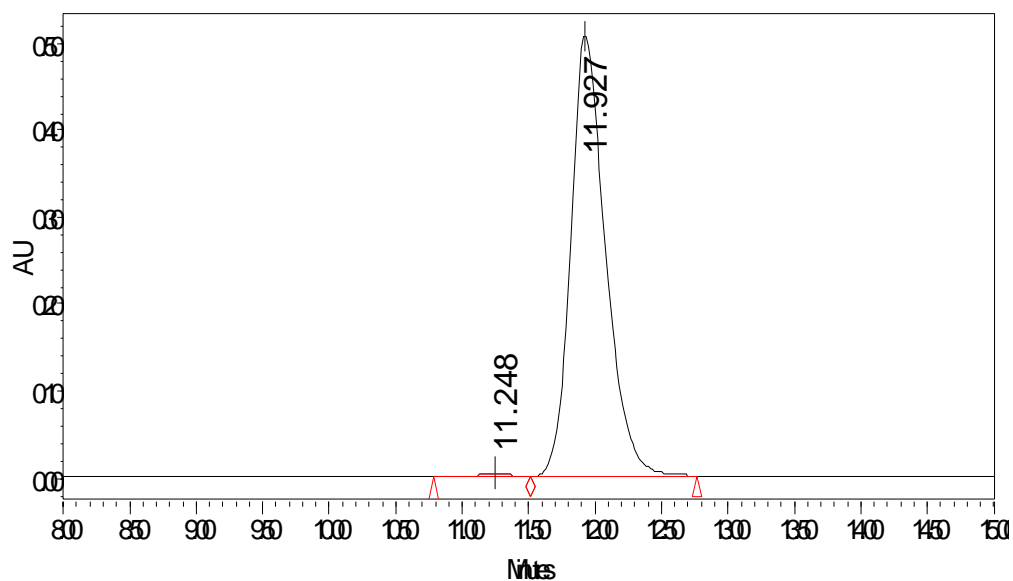

|   | Retention Time | Area    | % Area | Height | % Height | Start Time | End Time |
|---|----------------|---------|--------|--------|----------|------------|----------|
| 1 | 11.248         | 69610   | 0.75   | 4869   | 0.95     | 10.783     | 11.517   |
| 2 | 11.927         | 9215727 | 99.25  | 508244 | 99.05    | 11.517     | 12.767   |

**(S) 2-Hydroxy-4-oxo-4-phenyl-butyrac acid ethyl ester (5s)**

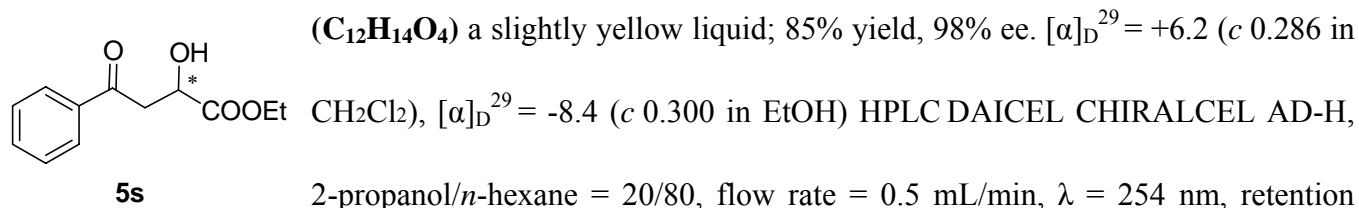

time: 19.8 min (major) and 21.9 min (minor);  $^1H$  NMR (400 MHz,  $CDCl_3$ ) 1.25-1.31 (m, 3H), 3.36 (s, 1H), 3.43-3.50 (dd,  $J = 17.6, 4.0$  Hz, 1H), 3.50-3.57 (dd,  $J = 17.6, 6.0$  Hz, 1H), 4.24-4.30 (m, 2H), 4.65-4.67 (m, 1H), 7.46-7.50 (m, 2H), 7.57-7.60 (m, 1H), 7.94-7.97 (m, 2H) ppm.

The absolute configuration was determined by the comparison of HPLC retention time and the optical rotation.<sup>[2a, 4]</sup>

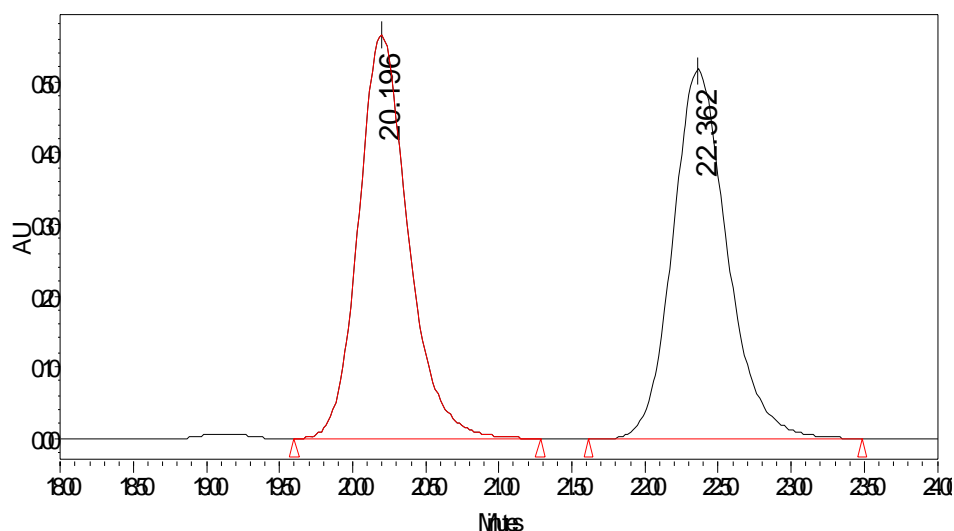

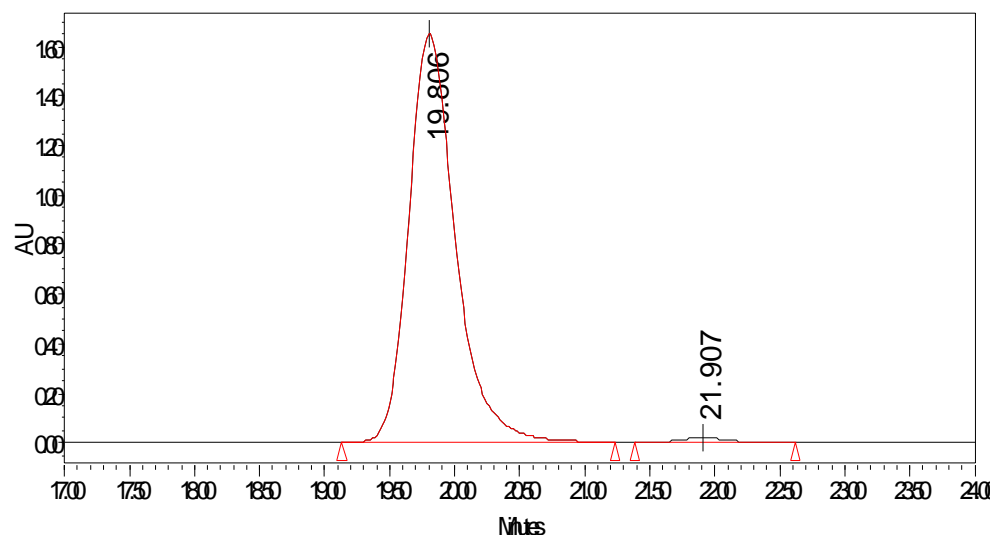

|   | Retention Time | Peak Type | Area     | % Area | Height  | % Height |
|---|----------------|-----------|----------|--------|---------|----------|
| 1 | 19.806         | Unknown   | 41228525 | 98.97  | 1650494 | 98.92    |
| 2 | 21.907         | Unknown   | 427257   | 1.03   | 17951   | 1.08     |

### 2-hydroxy-1-phenyl-4-o-tolylbutane-1,4-dione (**5t**)

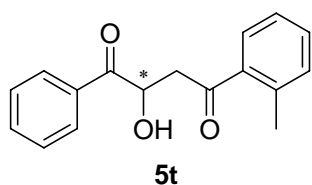

**5t**

(**C<sub>17</sub>H<sub>16</sub>O<sub>3</sub>**) a white solid; 92% yield, >99% ee.  $[\alpha]_D^{25} = -8.1$  (c 0.320 in CH<sub>2</sub>Cl<sub>2</sub>) HPLC DAICEL CHIRALCEL OJ-H, 2-propanol/*n*-hexane = 20/80, flow rate = 1.0 mL/min,  $\lambda = 254$  nm, retention time: 13.3 min (minor) and 14.3

min (major); <sup>1</sup>H NMR (400 MHz, CDCl<sub>3</sub>) 2.51 (s, 3H), 3.30-3.33 (m, 2H), 4.03 (d, *J* = 6.0 Hz, 1H), 5.62-5.65 (m, 1H), 7.22-7.26 (m, 2H), 7.35-7.40 (m, 1H), 7.48-7.53 (m, 2H), 7.60-7.64 (m, 2H), 7.97-8.00 (m, 2H) ppm; <sup>13</sup>C NMR (100 MHz, CDCl<sub>3</sub>) 21.4, 46.4, 70.5, 125.8, 128.7, 128.9, 130.0, 131.8, 132.1, 133.6, 134.0, 137.2, 138.7, 200.7, 200.8 ppm; HRMS (ESI-TOF) calcd for C<sub>17</sub>H<sub>16</sub>O<sub>3</sub> ([M-H<sup>+</sup>]) = 267.1021, Found 267.1028.

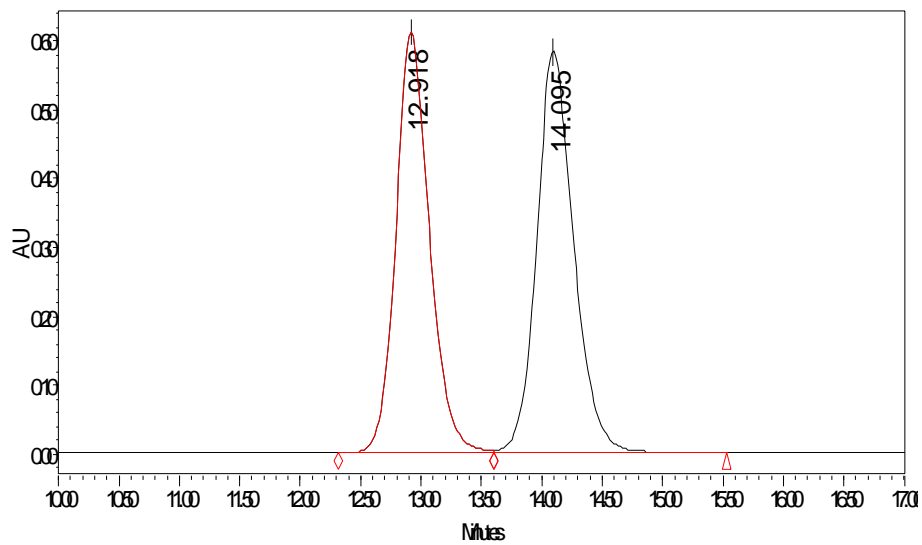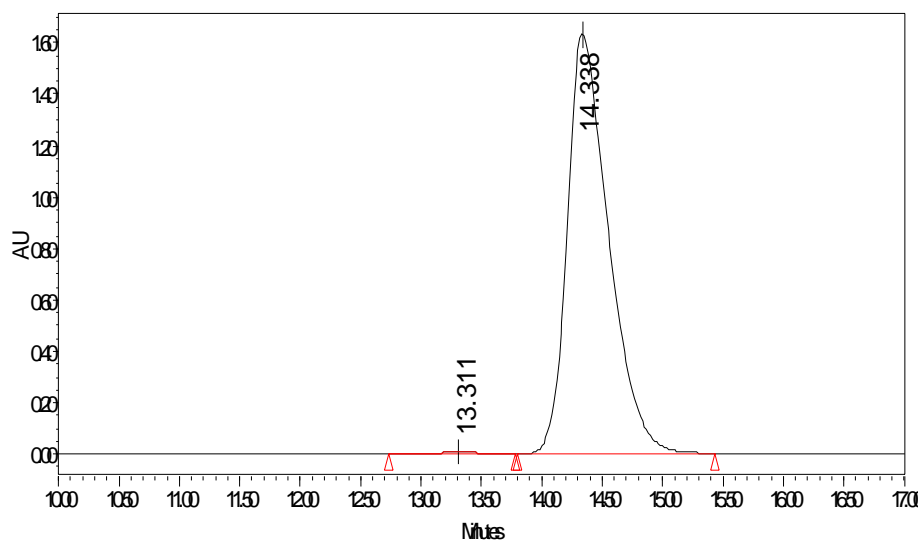

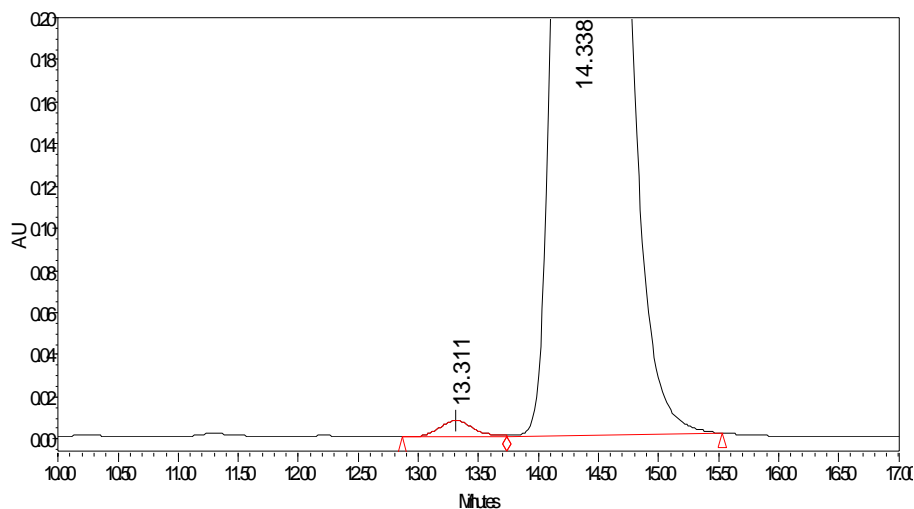

|   | Retention Time | Area     | % Area | Height  | % Height | Start Time | End Time |
|---|----------------|----------|--------|---------|----------|------------|----------|
| 1 | 13.311         | 151393   | 0.39   | 7794    | 0.48     | 12.867     | 13.733   |
| 2 | 14.338         | 38777878 | 99.61  | 1631999 | 99.52    | 13.733     | 15.533   |

### 2-hydroxy-1-phenyl-4-m-tolylbutane-1,4-dione (**5u**)

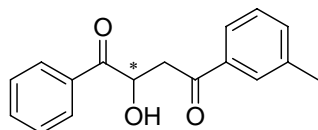

**5u**

( $C_{17}H_{16}O_3$ ) a white solid; 92% yield, >99% ee.  $[\alpha]_D^{25} = +10.8$  (c 0.426 in

$CH_2Cl_2$ ) HPLC DAICEL CHIRALCEL OJ-H, 2-propanol/*n*-hexane = 20/80,

flow rate = 1.0 mL/min,  $\lambda = 254$  nm, retention time: 13.3 min (minor) and

14.3 min (major);  $^1H$  NMR (400 MHz,  $CDCl_3$ ) 2.40 (s, 3H), 3.33-3.45 (m, 2H), 4.02 (d,  $J = 6.0$  Hz, 1H),

5.65-5.69 (m, 1H), 7.31-7.39 (m, 2H), 7.47-7.52 (m, 2H), 7.59-7.63 (m, 1H), 7.72-7.75 (m, 2H),

7.86-7.89 (m, 2H) ppm;  $^{13}C$  NMR (100 MHz,  $CDCl_3$ ) 21.3, 43.6, 70.1, 125.6, 128.6, 128.7, 128.8, 130.0,

133.6, 133.9, 134.4, 136.7, 138.5, 197.4, 200.8 ppm; HRMS (ESI-TOF) calcd for  $C_{17}H_{16}O_3$  ( $[M-H]^+$ ) =

267.1021, Found 267.1035.

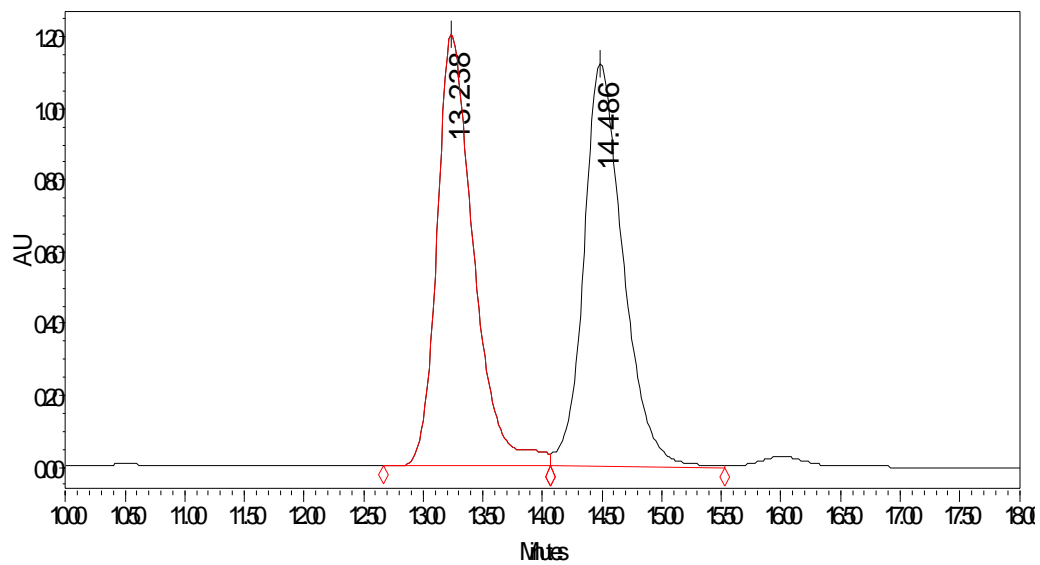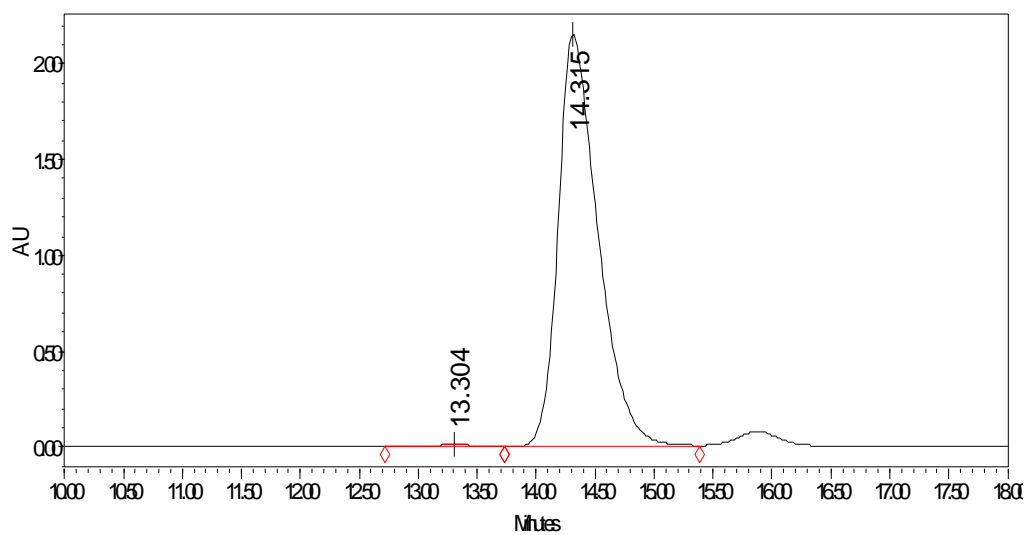



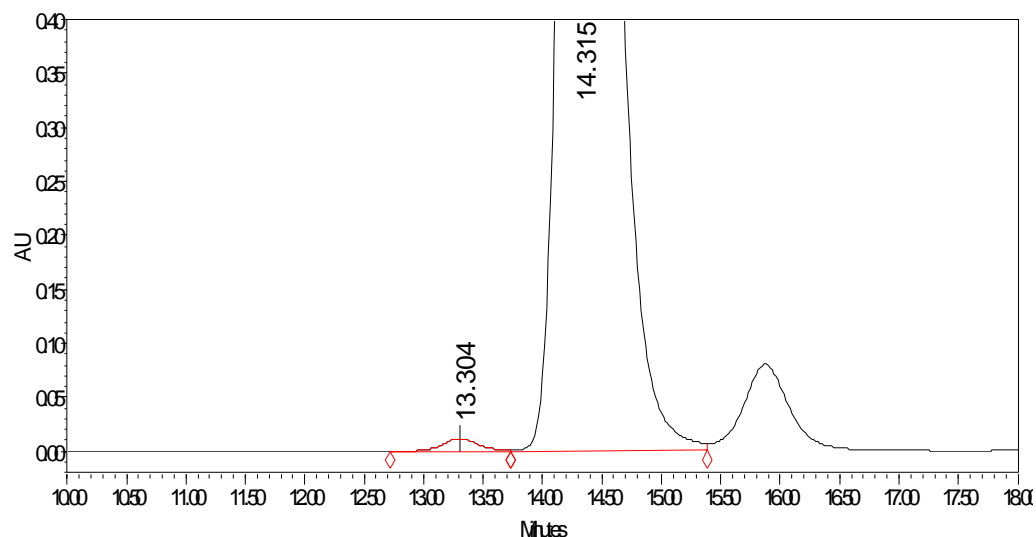

|   | Retention Time | Area     | % Area | Height  | % Height | Start Time | End Time |
|---|----------------|----------|--------|---------|----------|------------|----------|
| 1 | 13.304         | 244026   | 0.48   | 11522   | 0.53     | 12.717     | 13.733   |
| 2 | 14.315         | 50733155 | 99.52  | 2153255 | 99.47    | 13.733     | 15.383   |

### 2-hydroxy-1-phenyl-4-p-tolylbutane-1,4-dione (**5v**)

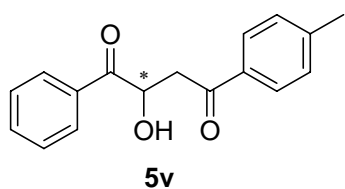

(**C**<sub>17</sub>**H**<sub>16</sub>**O**<sub>3</sub>) a white solid; 94% yield, >99% ee.  $[\alpha]_D^{25} = +16.8$  (*c* 0.384 in CH<sub>2</sub>Cl<sub>2</sub>) HPLC DAICEL CHIRALCEL IB, 2-propanol/*n*-hexane = 10/90, flow rate = 1.0 mL/min,  $\lambda = 254$  nm, retention time: 14.3 min (minor) and

15.7 min (major); <sup>1</sup>H NMR (400 MHz, CDCl<sub>3</sub>) 2.40 (s, 3H), 3.32-3.43 (m, 2H), 4.03 (d, *J* = 6.0 Hz, 1H), 5.64-5.69 (m, 1H), 7.23-7.26 (m, 2H), 7.47-7.51 (m, 2H), 7.59-7.62 (m, 1H), 7.82-7.85 (m, 2H), 7.98-8.03 (m, 2H) ppm; <sup>13</sup>C NMR (100 MHz, CDCl<sub>3</sub>) 21.7, 43.4, 70.2, 128.5, 128.7, 128.9, 129.4, 133.7, 133.8, 134.3, 144.5, 196.8, 200.8 ppm; HRMS (ESI-TOF) calcd for C<sub>17</sub>H<sub>16</sub>O<sub>3</sub> ( $[M-H]^+$ ) = 267.1021, Found 267.1022.

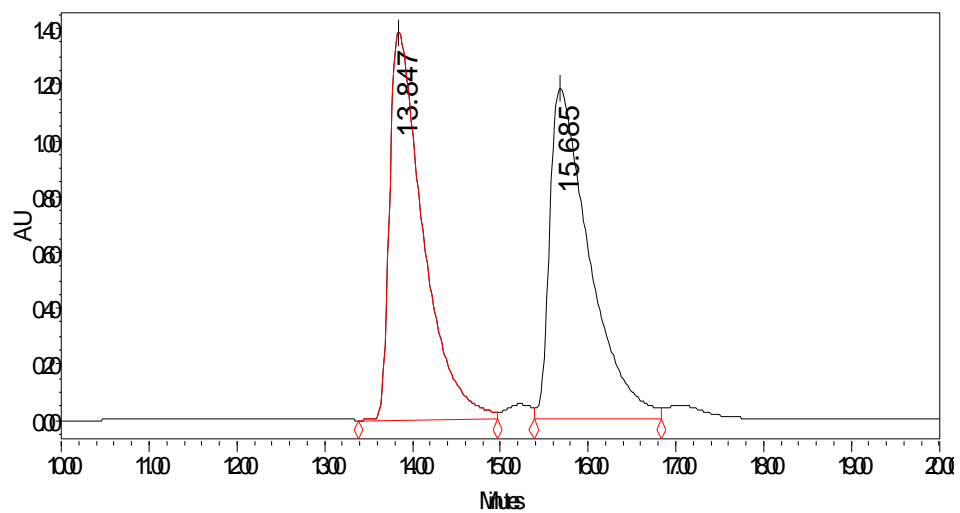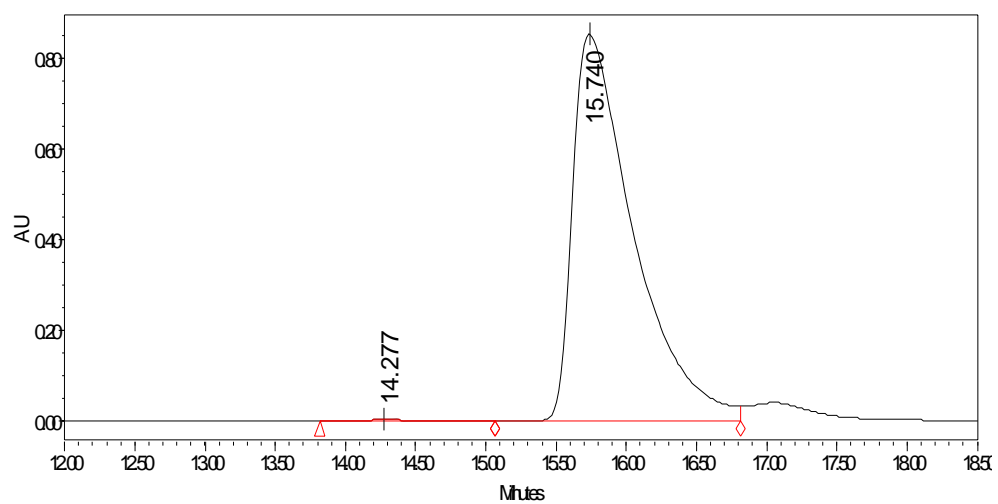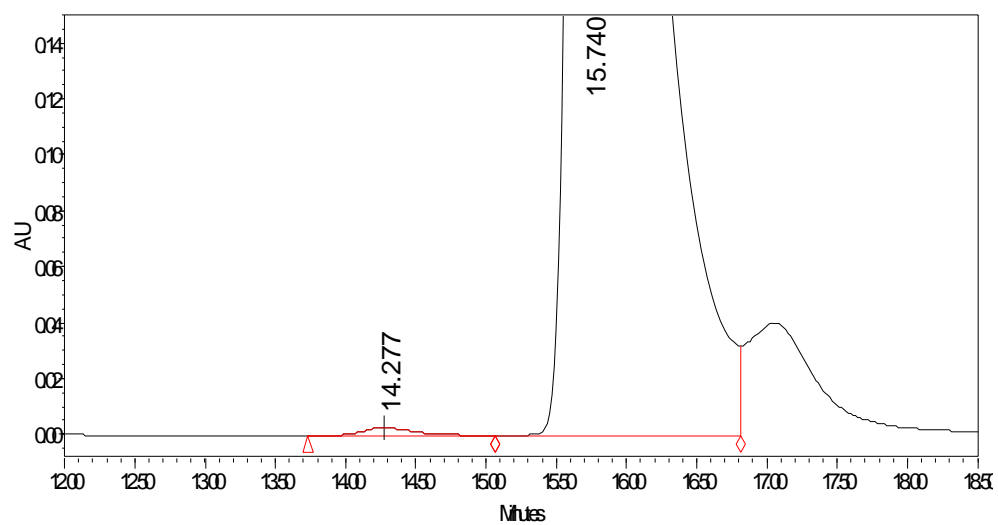

|   | Retention Time | Area     | % Area | Height | % Height | Start Time | End Time |
|---|----------------|----------|--------|--------|----------|------------|----------|
| 1 | 14.277         | 71443    | 0.28   | 2779   | 0.32     | 13.733     | 15.067   |
| 2 | 15.740         | 25888176 | 99.72  | 855497 | 99.68    | 15.067     | 16.817   |

## 2-hydroxy-4-(4-methoxyphenyl)-1-phenylbutane-1,4-dione (**5w**)

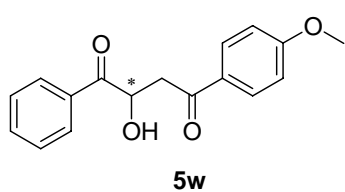

(**C<sub>17</sub>H<sub>16</sub>O<sub>4</sub>**) a white solid; 95% yield, 99% ee.  $[\alpha]_D^{25} = +4.8$  (*c* 0.460 in  $\text{CH}_2\text{Cl}_2$ ) HPLC DAICEL CHIRALCEL IB, 2-propanol/*n*-hexane = 10/90, flow rate = 1.0 mL/min,  $\lambda = 254$  nm, retention time: 28.7 min (minor) and

31.7 min (major);  $^1\text{H}$  NMR (400 MHz,  $\text{CDCl}_3$ ) 3.32-3.44 (m, 2H), 3.88 (s, 3H), 4.05 (d,  $J = 6.0$  Hz, 1H), 5.66-5.70 (m, 1H), 6.93-6.96 (m, 2H), 7.50-7.61 (m, 2H), 7.62-7.65 (m, 1H), 7.93-7.97 (m, 2H), 8.00-8.03 (m, 2H) ppm;  $^{13}\text{C}$  NMR (100 MHz,  $\text{CDCl}_3$ ) 43.2, 55.5, 70.3, 113.8, 128.8, 128.9, 129.8, 130.7, 133.7, 133.9, 163.9, 195.7, 200.9 ppm; HRMS (ESI-TOF) calcd for  $\text{C}_{17}\text{H}_{16}\text{O}_4$  ( $[\text{M}+\text{H}^+]$ ) = 285.1121, Found 285.1132.

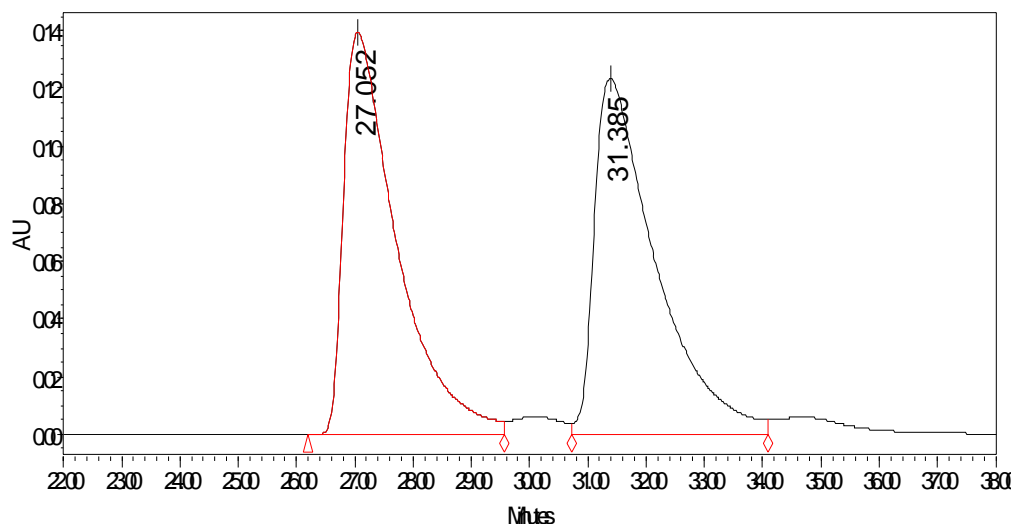

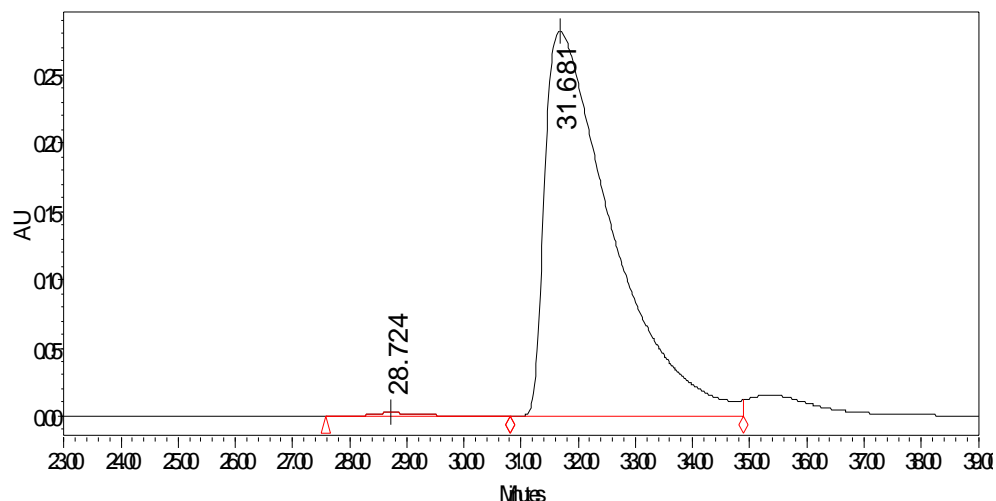

|   | Retention Time | Area     | % Area | Height | % Height | Start Time | End Time |
|---|----------------|----------|--------|--------|----------|------------|----------|
| 1 | 28.724         | 172509   | 0.74   | 2619   | 0.92     | 27.583     | 30.817   |
| 2 | 31.681         | 23155692 | 99.26  | 281826 | 99.08    | 30.817     | 34.883   |

#### 4-(4-chlorophenyl)-2-hydroxy-1-phenylbutane-1,4-dione (**5x**)

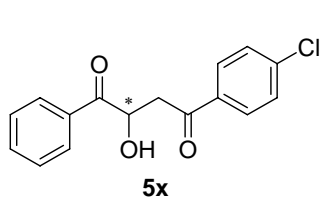

(**C<sub>16</sub>H<sub>13</sub>ClO<sub>3</sub>**) a white solid; 87% yield, 99% ee.  $[\alpha]_D^{25} = +4.8$  (*c* 0.540 in  $\text{CH}_2\text{Cl}_2$ ) HPLC DAICEL CHIRALCEL IB, 2-propanol/*n*-hexane = 10/90, flow rate = 1.0 mL/min,  $\lambda = 254$  nm, retention time: 15.8 min (minor) and

17.1 min (major);  $^1\text{H}$  NMR (400 MHz,  $\text{CDCl}_3$ ) 3.32-3.44 (m, 2H), 4.03 (d,  $J = 6.0$  Hz, 1H), 5.66-5.70 (m, 1H), 7.44-7.46 (m, 2H), 7.52-7.56 (m, 2H), 7.62-7.68 (m, 1H), 7.89-7.92 (m, 2H), 8.00-8.02 (m, 2H) ppm;  $^{13}\text{C}$  NMR (100 MHz,  $\text{CDCl}_3$ ) 43.5, 70.1, 128.7, 129.0, 129.1, 129.8, 133.5, 134.1, 135.0, 140.2, 196.1, 200.6 ppm; HRMS (ESI-TOF) calcd for  $\text{C}_{16}\text{H}_{13}\text{ClO}_3$  ( $[\text{M}+\text{Na}^+]$ ) = 311.0445, Found 311.0454.

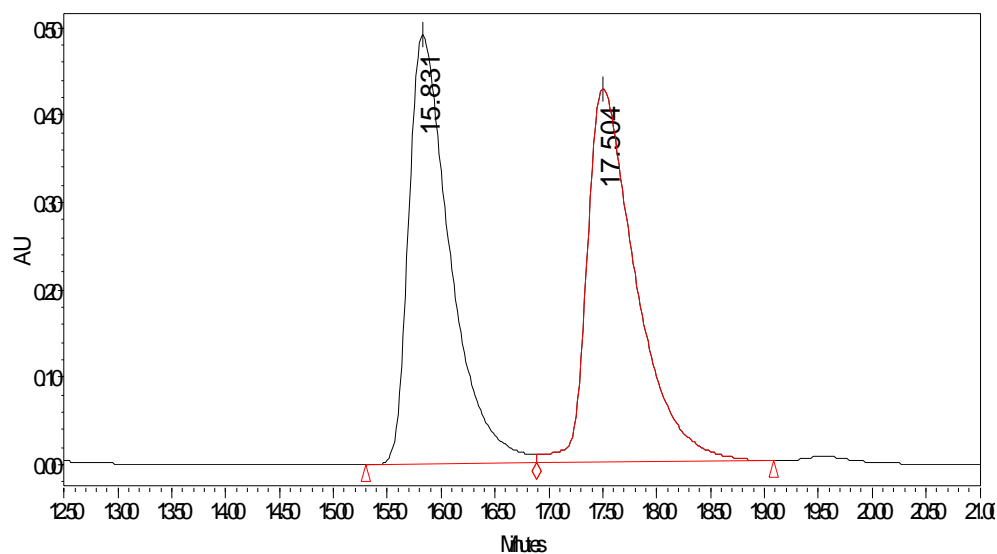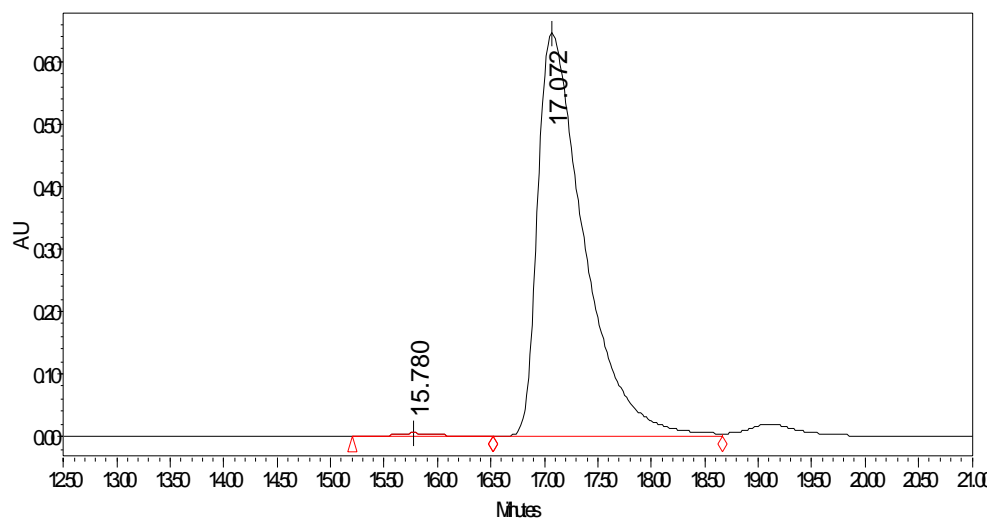

|   | Retention Time | Area     | % Area | Height | % Height | Start Time | End Time |
|---|----------------|----------|--------|--------|----------|------------|----------|
| 1 | 15.780         | 105041   | 0.54   | 4315   | 0.66     | 15.200     | 16.517   |
| 2 | 17.072         | 19492728 | 99.46  | 644712 | 99.34    | 16.517     | 18.667   |

#### 4-(4-fluorophenyl)-2-hydroxy-1-phenylbutane-1,4-dione (**5y**)

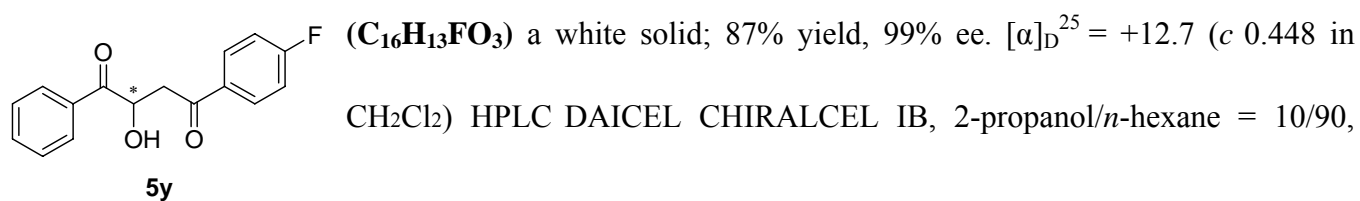

flow rate = 1.0 mL/min,  $\lambda = 254$  nm, retention time: 12.7 min (minor) and 13.6 min (major);  $^1\text{H}$  NMR (400 MHz,  $\text{CDCl}_3$ ) 3.31-3.40 (m, 2H), 4.03 (d,  $J = 5.6$  Hz, 1H), 5.64-5.68 (m, 1H), 7.10-7.20 (m, 2H), 7.48-7.52 (m, 2H), 7.59-7.64 (m, 1H), 7.95-8.00 (m, 4H) ppm;  $^{13}\text{C}$  NMR (100 MHz,  $\text{CDCl}_3$ ) 43.5, 70.1, 115.8(d,  $J_{CF} = 22$  Hz), 128.7, 129.0, 131.0 (d,  $J_{CF} = 9$  Hz), 133.1 (d,  $J_{CF} = 4$  Hz), 133.5, 134.0, 166.0 (d,  $J_{CF} = 255$  Hz), 195.6, 200.7 ppm; HRMS (ESI-TOF) calcd for  $\text{C}_{16}\text{H}_{13}\text{FO}_3$  ( $[\text{M}+\text{Na}^+]$ ) = 295.0741, Found 295.0748.

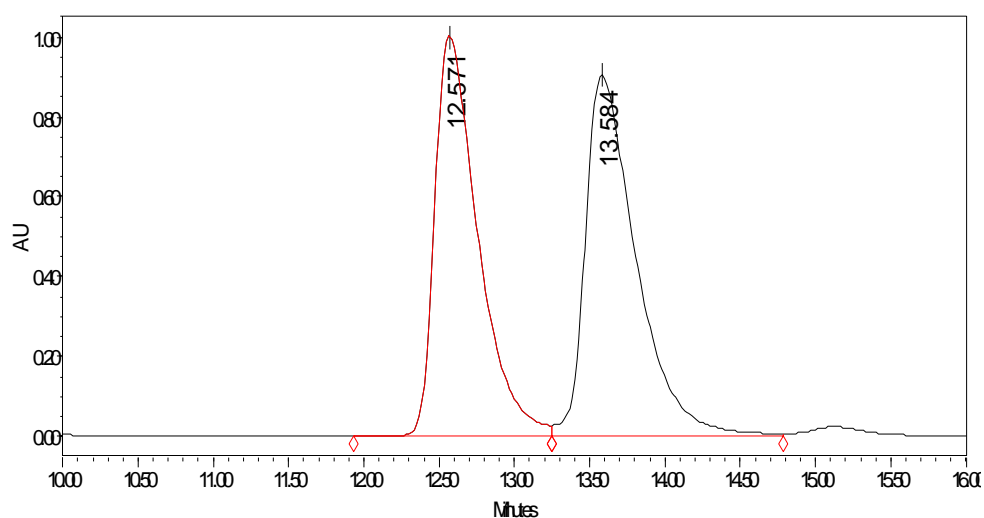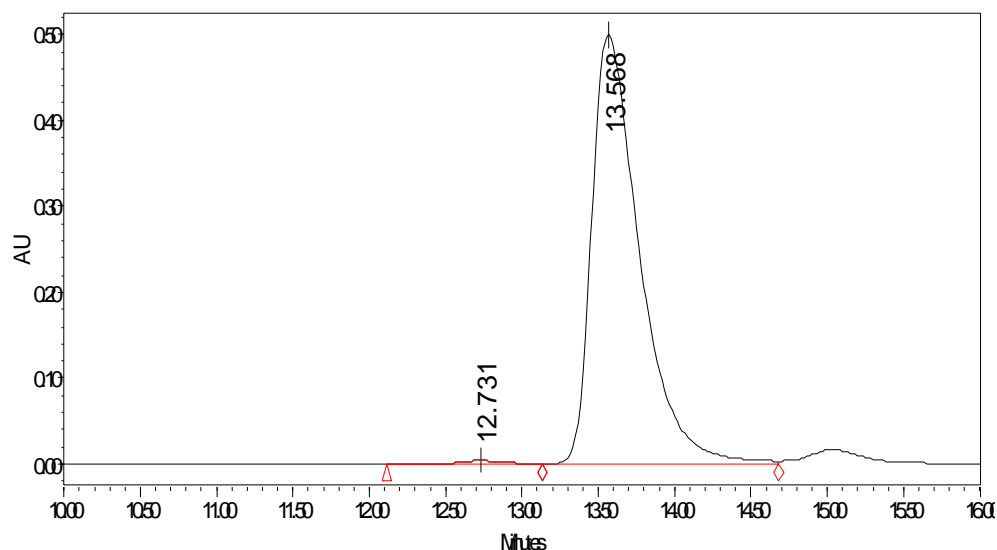

| Retention Time | Area | % Area | Height | % Height | Start Time | End Time |
|----------------|------|--------|--------|----------|------------|----------|
|----------------|------|--------|--------|----------|------------|----------|

|   |        |          |       |        |       |        |        |
|---|--------|----------|-------|--------|-------|--------|--------|
| 1 | 12.731 | 63214    | 0.58  | 3433   | 0.68  | 12.117 | 13.133 |
| 2 | 13.568 | 10838880 | 99.42 | 499134 | 99.32 | 13.133 | 14.683 |

### 2-hydroxy-1-phenyl-4-m-tolylbutane-1,4-dione (**5z**)

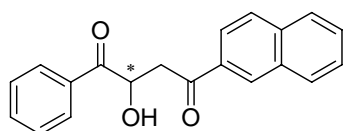

**5z**

(**C<sub>20</sub>H<sub>16</sub>O<sub>3</sub>**) a white solid; 91% yield, >99% ee.  $[\alpha]_D^{25} = -5.1$  (*c* 0.440 in CH<sub>2</sub>Cl<sub>2</sub>) HPLC DAICEL CHIRALCEL OJ-H, 2-propanol/*n*-hexane = 30/70, flow rate = 1.0 mL/min,  $\lambda = 254$  nm, retention time: 28.9 min (minor) and

36.9 min (major); <sup>1</sup>H NMR (400 MHz, CDCl<sub>3</sub>) 3.47-3.60 (m, 2H), 4.09 (d, *J* = 6.0 Hz, 1H), 5.62-5.65 (m, 1H), 7.50-7.63 (m, 5H), 7.85-7.93 (m, 3H), 8.00-8.04 (m, 3H), 8.43 (s, 1H) ppm; <sup>13</sup>C NMR (100 MHz, CDCl<sub>3</sub>) 43.6, 70.2, 123.8, 126.9, 127.8, 128.6, 128.8, 129.0, 129.7, 130.4, 132.4, 133.7, 134.0, 135.8, 197.1, 200.8 ppm; HRMS (ESI-TOF) calcd for C<sub>20</sub>H<sub>16</sub>O<sub>3</sub> ([M+H<sup>+</sup>]) = 305.1172, Found 305.1178.

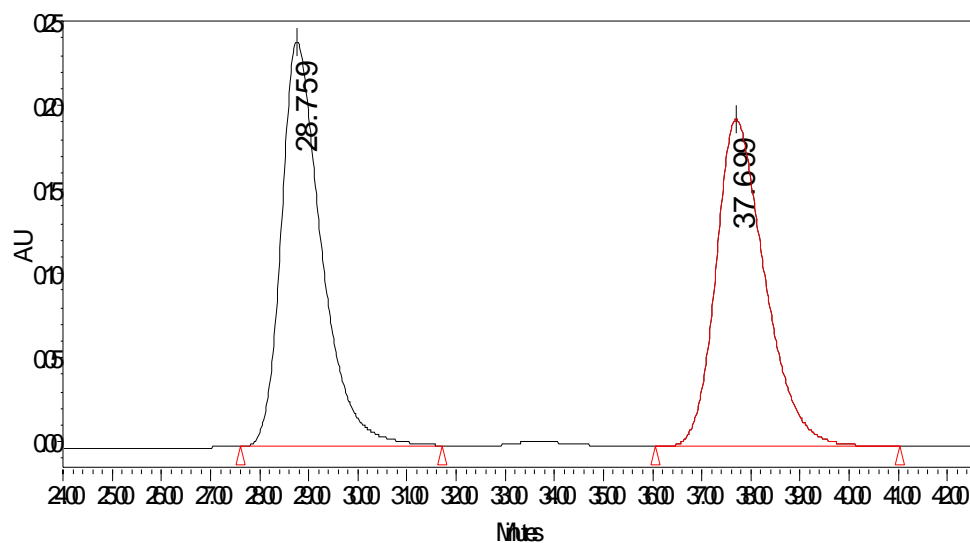

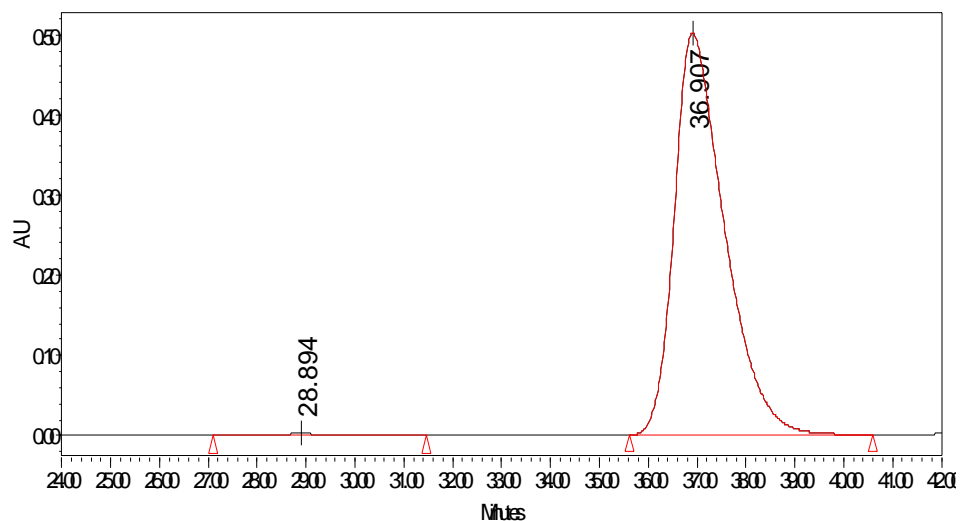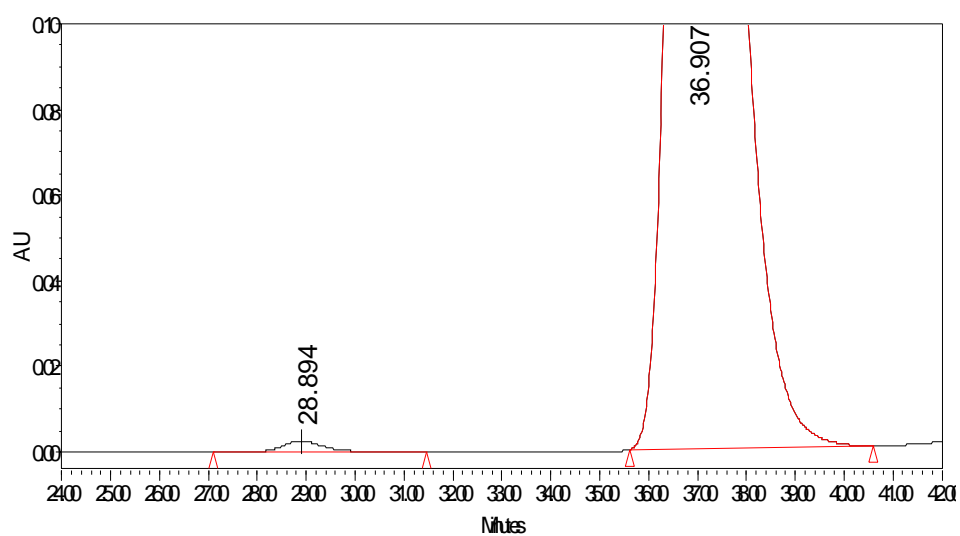

|   | Retention Time | Area     | % Area | Height | % Height | Start Time | End Time |
|---|----------------|----------|--------|--------|----------|------------|----------|
| 1 | 28.894         | 157801   | 0.44   | 2644   | 0.52     | 27.100     | 31.467   |
| 2 | 36.907         | 35818752 | 99.56  | 501377 | 99.48    | 35.617     | 40.600   |

**Configuration Assignment:** The absolute and relative configurations were determined by the comparison of the optical rotation and  $^1\text{H}$  NMR Spectra.<sup>2</sup>

**(2*S*,3*R*)-2-hydroxy-3-methyl-1,4-diphenylbutane-1,4-dione (*anti*-5aa)**



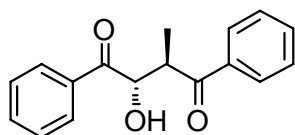

*anti*-5aa

( $C_{17}H_{16}O_3$ ) a slightly yellow liquid; 88% yield, 99% ee.  $[\alpha]_D^{25} = 84.1$  ( $c$  0.156

in  $CH_2Cl_2$ ) HPLC DAICEL CHIRALCEL AD-H, 2-propanol/*n*-hexane = 10/90,

flow rate = 1.0 mL/min,  $\lambda = 254$  nm, retention time: 17.1 min (minor) and 18.0

min (major);  $^1H$  NMR (400 MHz,  $CDCl_3$ ) *anti*: 1.27 (d,  $J = 7.6$  Hz, 3H), 3.89-3.95 (m, 1H), 4.30 (d,  $J =$

9.2 Hz, 1H), 5.13 (dd,  $J_1 = 4.4$  Hz,  $J_2 = 9.2$  Hz, 1H), 7.37-7.41 (m, 4H), 7.49-7.53 (m, 2H), 7.84 (d,  $J =$

7.2 Hz, 2H), 7.91 (d,  $J = 7.6$  Hz, 2H) ppm.

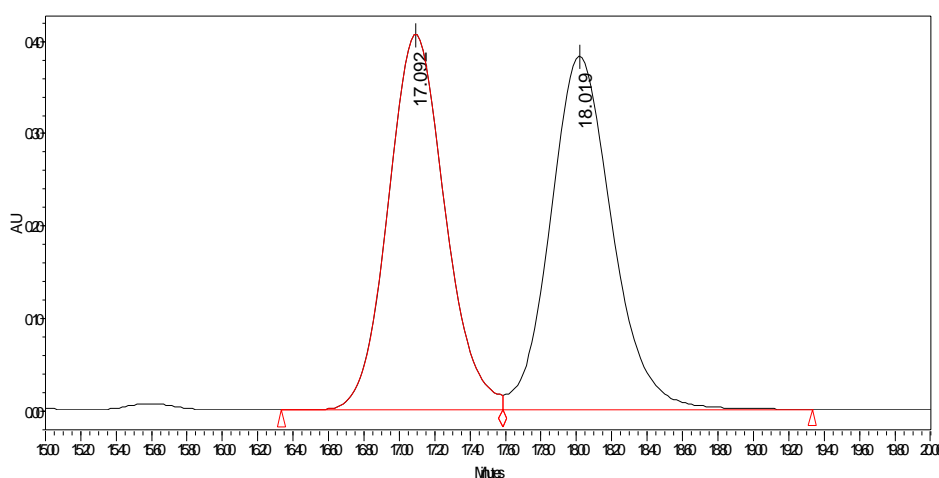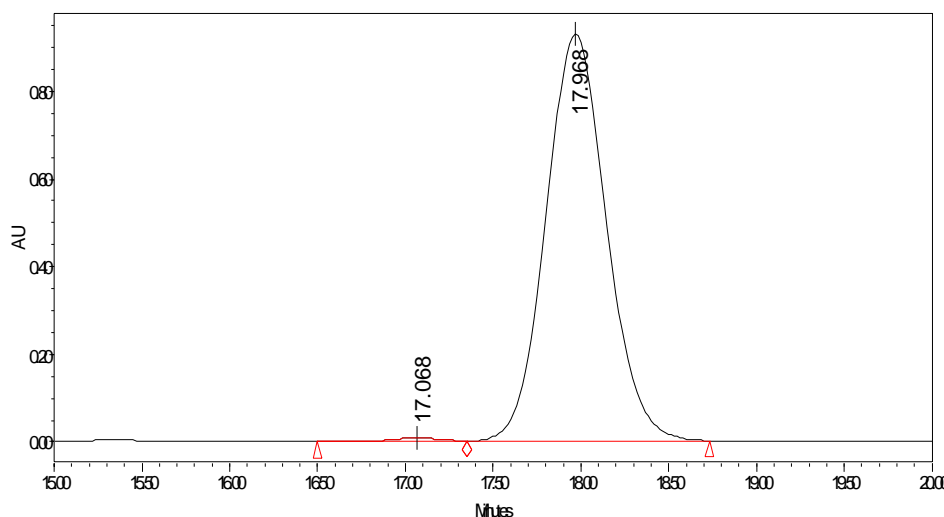

|   | Retention Time | Area     | % Area | Height | % Height | Start Time | End Time |
|---|----------------|----------|--------|--------|----------|------------|----------|
| 1 | 17.068         | 166332   | 0.74   | 8142   | 0.87     | 16.500     | 17.350   |
| 2 | 17.968         | 22238348 | 99.26  | 928889 | 99.13    | 17.350     | 18.717   |

**Configuration Assignment:** The absolute and relative configurations were determined by the comparison of the optical rotation and  $^1\text{H}$  NMR Spectra.<sup>2</sup>

**(2*S*,3*S*)-2-hydroxy-3-methyl-1,4-diphenylbutane-1,4-dione (*syn*-5aa)**

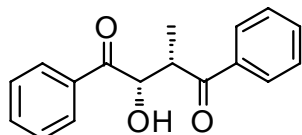

*syn*-5aa

( $\text{C}_{17}\text{H}_{16}\text{O}_3$ ) a slightly yellow liquid; 75% yield, 18% ee. HPLC DAICEL

CHIRALCEL AD-H, 2-propanol/*n*-hexane = 10/90, flow rate = 1.0 mL/min,  $\lambda$

= 254 nm, retention time: 15.8 min and 22.1 min or HPLC DAICEL

CHIRALCEL OJ-H, 2-propanol/*n*-hexane = 15/85, flow rate = 1.0 mL/min,  $\lambda$  = 254 nm, retention time:

18.1 min and 20.6 min;  $^1\text{H}$  NMR (400 MHz,  $\text{CDCl}_3$ ) *syn*: 1.04 (d,  $J$  = 7.2 Hz, 3H), 3.63 (d,  $J$  = 6.0 Hz,

1H), 3.72-3.79 (m, 1H), 5.40 (s, 1H), 7.37-7.59 (m, 6 H), 7.82 (d,  $J$  = 7.6 Hz, 2H), 7.86 (d,  $J$  = 7.6 Hz,

2H) ppm.

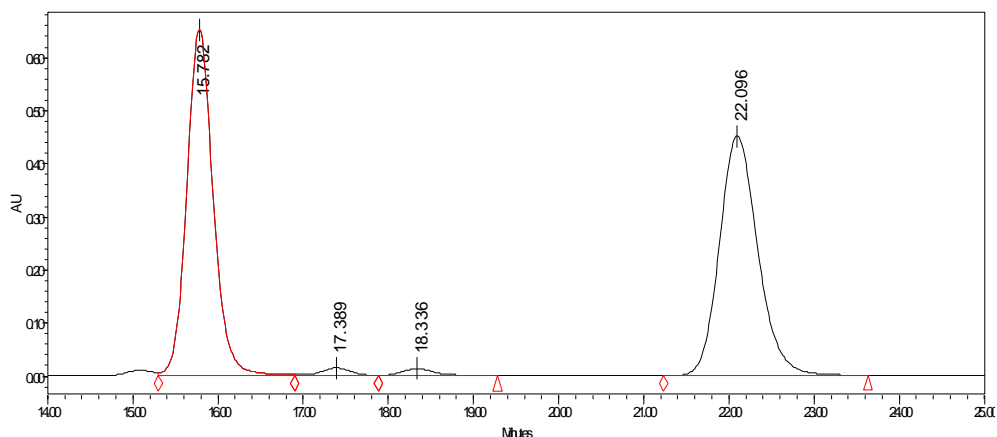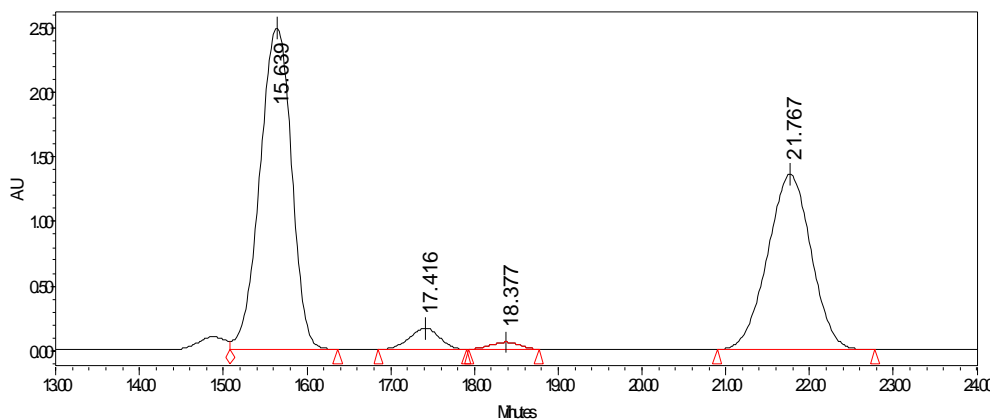

|   | Retention Time | Area     | % Area | Height  | % Height | Start Time | End Time |
|---|----------------|----------|--------|---------|----------|------------|----------|
| 1 | 15.639         | 65732057 | 54.55  | 2497752 | 61.26    | 15.083     | 16.367   |
| 2 | 17.416         | 4091875  | 3.40   | 162945  | 4.00     | 16.850     | 17.900   |
| 3 | 18.377         | 1341326  | 1.11   | 55496   | 1.36     | 17.933     | 18.767   |
| 4 | 21.767         | 49324722 | 40.94  | 1360830 | 33.38    | 20.900     | 22.783   |

**Configuration Assignment:** The absolute and relative configurations were determined by analogy.

**(2*S*,3*R*)-2-hydroxy-3-ethyl-1,4-diphenylbutane-1,4-dione (*anti*-5ab)**

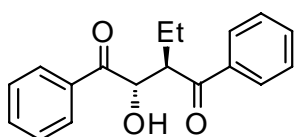

*anti*-5ab

( $C_{18}H_{18}O_3$ ) a slightly yellow liquid; 83% yield, 98% ee.  $[\alpha]_D^{25} = 99.4$  ( $c$  0.332 in  $CH_2Cl_2$ ) HPLC DAICEL CHIRALCEL OJ-H, 2-propanol/*n*-hexane = 10/90, flow rate = 1.0 mL/min,  $\lambda = 254$  nm, retention time: 22.0 min (major)

and 27.6 min (minor);  $^1H$  NMR (400 MHz,  $CDCl_3$ ) *anti*: 1.01-1.08 (m, 3H), 1.82-1.94 (m, 2H), 3.80-3.85 (m, 1H), 4.49 (d,  $J = 6.0$  Hz, 1H), 5.24 (dd,  $J_1 = 4.0$  Hz,  $J_2 = 9.6$  Hz, 1H), 7.42-7.50 (m, 4H), 7.54-7.60 (m, 2H), 7.87 (d,  $J = 7.2$  Hz, 2H), 7.95 (d,  $J = 7.6$  Hz, 2H) ppm,  $^{13}C$  NMR (100 MHz,  $CDCl_3$ ) 12.3, 22.8, 49.1, 75.2, 128.4, 128.6, 128.7, 129.2, 133.4, 133.6, 135.1, 137.2, 200.3, 205.3 ppm; HRMS (ESI-TOF) calcd for  $C_{18}H_{18}O_3$  ( $[M+Na^+]$ ) = 305.1148, Found 305.1156.

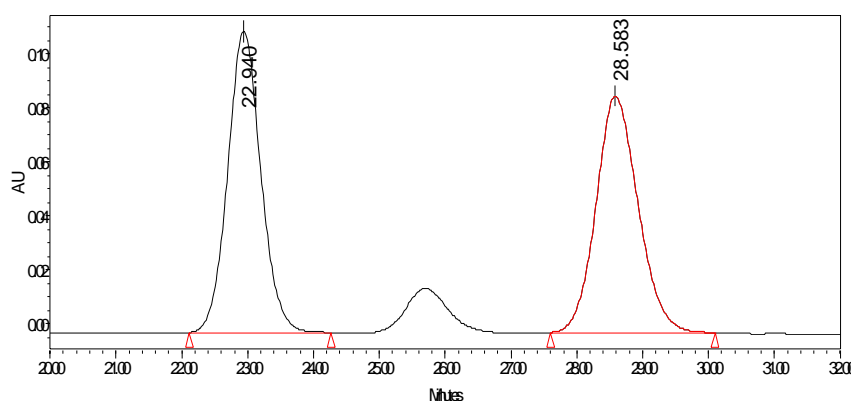

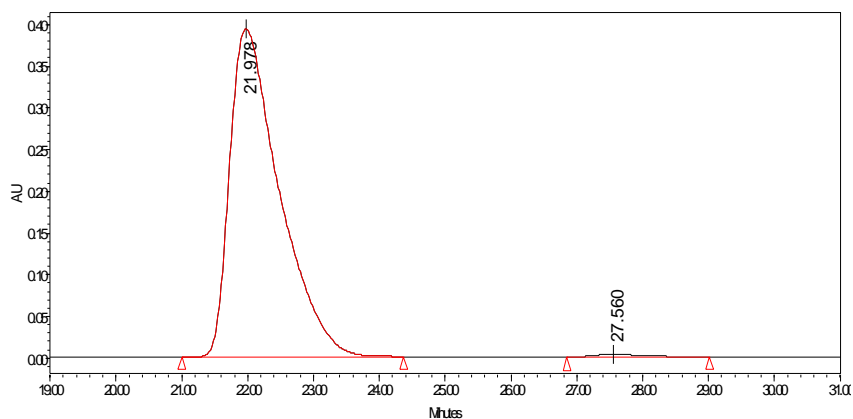

|   | Retention Time | Area     | % Area | Height | % Height | Start Time | End Time |
|---|----------------|----------|--------|--------|----------|------------|----------|
| 1 | 21.978         | 20614971 | 98.95  | 393604 | 99.03    | 21.000     | 24.367   |
| 2 | 27.560         | 217803   | 1.05   | 3870   | 0.97     | 26.850     | 29.017   |

**Configuration Assignment:** The absolute and relative configurations were determined by analogy.

**(2*S*,3*S*)-2-hydroxy-3-ethyl-1,4-diphenylbutane-1,4-dione (*syn*-5ab)**

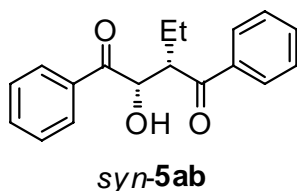

(**C<sub>18</sub>H<sub>18</sub>O<sub>3</sub>**) a slightly yellow liquid; 76% yield, 16% ee.  $[\alpha]_D^{25} = 23.9$  (*c* 0.244

in CH<sub>2</sub>Cl<sub>2</sub>) HPLC DAICEL CHIRALCEL AS-H, 2-propanol/*n*-hexane = 10/90,

flow rate = 1.0 mL/min,  $\lambda = 254$  nm, retention time: 14.1 min (major) and 22.2

min (minor); <sup>1</sup>H NMR (400 MHz, CDCl<sub>3</sub>) *syn*: 0.79-0.82 (m, 3H), 1.55-1.64 (m, 2H), 3.58 (d, *J* = 6.0

Hz, 1H), 3.70-3.77 (m, 1H), 5.32-5.35 (m, 1H), 7.44-7.50 (m, 4H), 7.52-7.60 (m, 2H), 7.87 (d, *J* = 8.0

Hz, 4H) ppm, <sup>13</sup>C NMR (100 MHz, CDCl<sub>3</sub>) 12.1, 21.4, 52.2, 73.6, 128.0, 128.2, 128.7, 128.8, 133.2,

133.9, 134.8, 137.3, 201.0, 201.3 ppm.

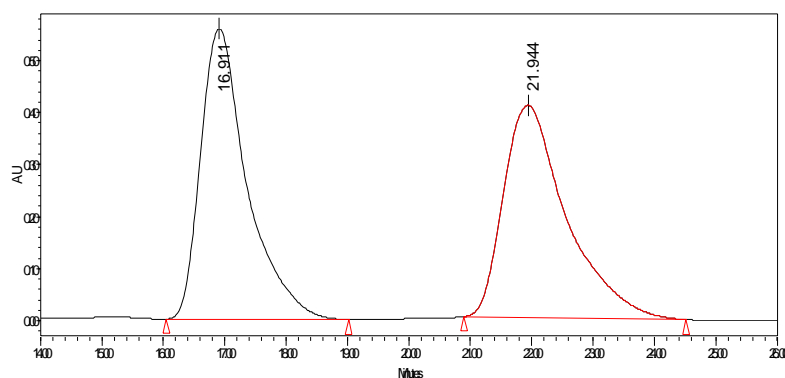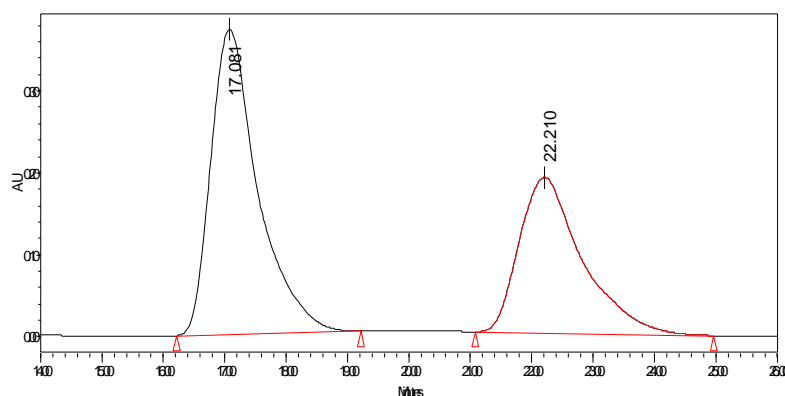

**Configuration Assignment:** The absolute and relative configurations were determined by the comparison of the optical rotation and  $^1\text{H}$  NMR Spectra. <sup>2</sup>

**(2*S*,3*R*)-ethyl- 2-hydroxy-3-methyl-4-oxo-4-phenylbutanoate (*anti*-5ac)**

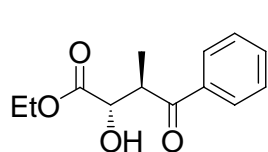

( $\text{C}_{13}\text{H}_{16}\text{O}_4$ ) a slightly yellow liquid; 85% yield, *anti/syn* = 99:1, >99% ee (*anti*).

$[\alpha]_{\text{D}}^{25} = 20.6$  ( $c$  0.344 in  $\text{CH}_2\text{Cl}_2$ ) HPLC DAICEL CHIRALCEL AS-H+AD-H,

***anti*-5ac**

2-propanol/*n*-hexane = 20/80, flow rate = 0.8 mL/min,  $\lambda = 254$  nm, retention time:

20.8 min, 23.3 min, 26.1 min and 31.9 min;  $^1\text{H}$  NMR (400 MHz,  $\text{CDCl}_3$ ) *anti*: 1.20 (t,  $J = 7.2$  Hz, 3H), 1.37 (d,  $J = 7.2$  Hz, 3H), 3.56 (d,  $J = 6.0$  Hz, 1H), 3.94-4.01 (m, 1H), 4.11-4.20 (m, 2H), 4.39 (s, 1H), 7.46-7.50 (m, 2H), 7.57-7.61 (m, 1H), 7.92-7.94 (m, 2H) ppm.

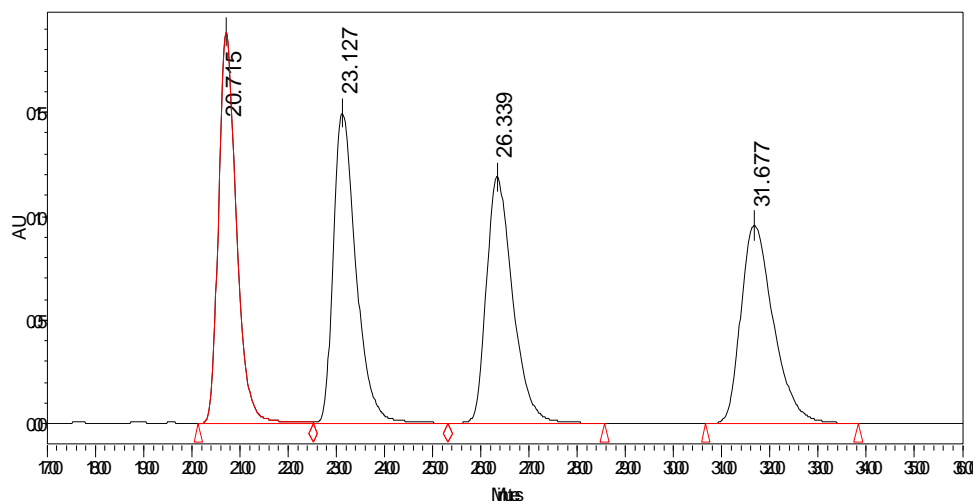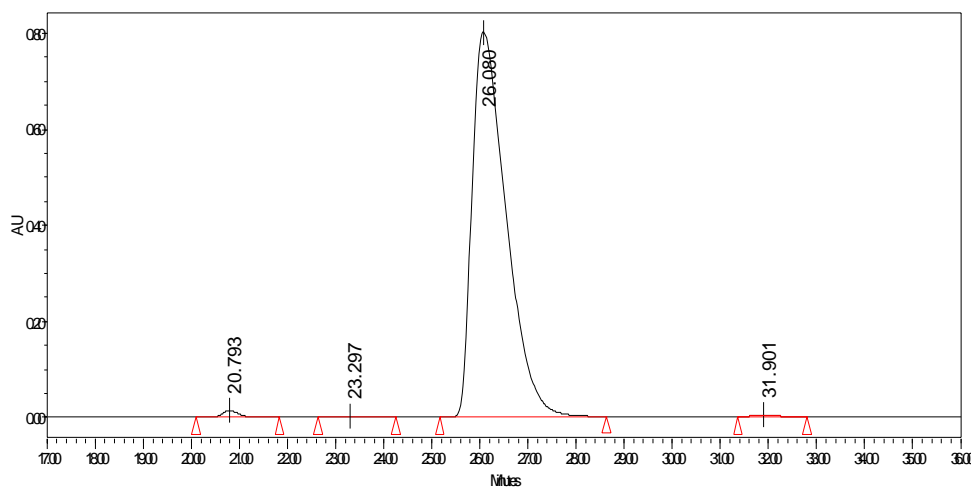

|   | Retention Time | Area     | % Area | Height | % Height | Start Time | End Time |
|---|----------------|----------|--------|--------|----------|------------|----------|
| 1 | 20.793         | 346619   | 0.87   | 13808  | 1.68     | 20.100     | 21.833   |
| 2 | 23.297         | 82462    | 0.21   | 2717   | 0.33     | 22.633     | 24.250   |
| 3 | 26.080         | 39259433 | 98.47  | 801935 | 97.46    | 25.167     | 28.633   |
| 4 | 31.901         | 180285   | 0.45   | 4411   | 0.54     | 31.367     | 32.800   |

**Configuration Assignment:** The absolute and relative configurations were determined by the comparison of the optical rotation and  $^1\text{H}$  NMR Spectra.<sup>2</sup>

**(2*S*,3*S*)-ethyl -2-hydroxy-3-methyl-4-oxo-4-phenylbutanoate (*syn*-5ac)**

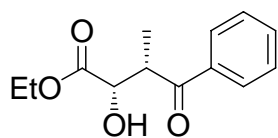

**syn-5ac**

( $C_{13}H_{16}O_4$ ) a slightly yellow liquid; 73% yield, *anti/syn* = 50:50, -73% ee (*anti*),

55% ee (*syn*).  $[\alpha]_D^{25} = 7.6$  (*c* 0.278 in  $CH_2Cl_2$ ) HPLC DAICEL CHIRALCEL

AS-H+AD-H, 2-propanol/*n*-hexane = 20/80, flow rate = 0.8 mL/min,  $\lambda = 254$

nm, retention time: 20.8 min, 23.3 min, 26.1 min and 31.9 min;  $^1H$  NMR (400 MHz,  $CDCl_3$ ) *syn*: 1.13 (t,  $J = 7.2$  Hz, 3H), 1.22 (d,  $J = 7.2$  Hz, 3H), 3.19 (d,  $J = 4.4$  Hz, 1H), 3.87-3.90 (m, 1H), 4.07-4.16 (m, 2H), 4.30-4.35 (m, 1H), 7.40-7.45 (m, 2H), 7.51-7.56 (m, 1H), 7.85-7.91 (m, 2H) ppm.

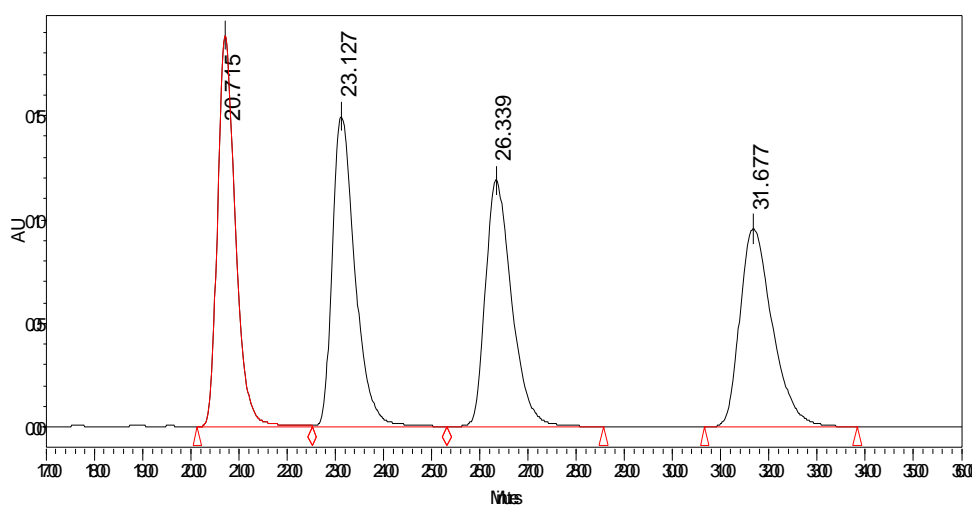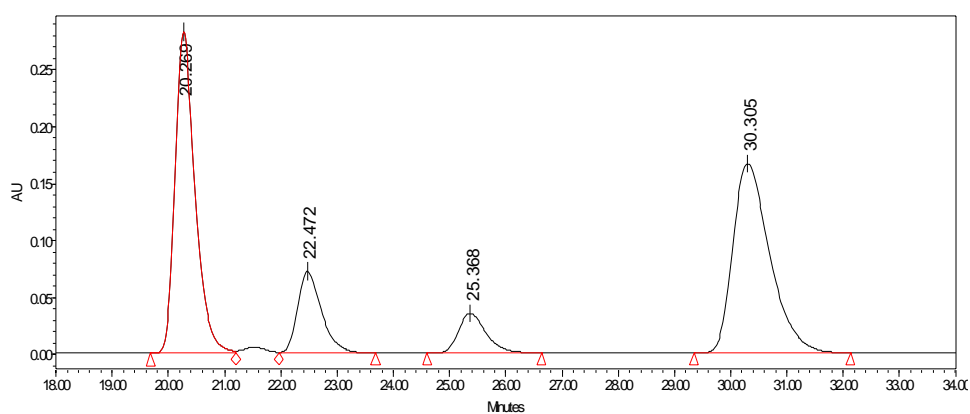

|   | Retention Time | Area    | % Area | Height | % Height | Start Time | End Time |
|---|----------------|---------|--------|--------|----------|------------|----------|
| 1 | 20.269         | 6956922 | 38.99  | 281849 | 50.82    | 19.683     | 21.200   |
| 2 | 22.472         | 2118783 | 11.87  | 71757  | 12.94    | 21.967     | 23.683   |
| 3 | 25.368         | 1184932 | 6.64   | 34828  | 6.28     | 24.600     | 26.633   |

|   |        |         |       |        |       |        |        |
|---|--------|---------|-------|--------|-------|--------|--------|
| 4 | 30.305 | 7584457 | 42.50 | 166172 | 29.96 | 29.350 | 32.133 |
|---|--------|---------|-------|--------|-------|--------|--------|

**Configuration Assignment:** The absolute and relative configurations were determined by the comparison of the optical rotation and  $^1\text{H}$  NMR Spectra.<sup>2</sup>

**(2*S*,3*R*)-ethyl 3-benzoyl-2-hydroxypentanoate (*anti*-5ad)**

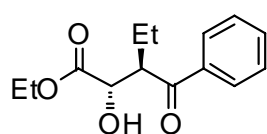

( $\text{C}_{14}\text{H}_{18}\text{O}_4$ ) a slightly yellow liquid; 82% yield, *anti/syn* = 98:2, 97% ee (*anti*).

$[\alpha]_{\text{D}}^{25} = 53.8$  ( $c$  0.400 in  $\text{CH}_2\text{Cl}_2$ ) HPLC DAICEL CHIRALCEL AS-H,

*anti*-5ad

2-propanol/*n*-hexane = 20/80, flow rate = 0.5 mL/min,  $\lambda = 254$  nm, retention time:

15.3 min, 17.5 min, 18.8 min and 26.5 min;  $^1\text{H}$  NMR (400 MHz,  $\text{CDCl}_3$ ) *anti*: 1.04 (t,  $J = 7.2$  Hz, 3H),

1.14 (t,  $J = 7.2$  Hz, 3H), 1.84-1.89 (m, 2H), 3.70 (d,  $J = 5.2$  Hz, 1H), 3.81-3.85 (m, 1H), 4.07-4.12 (m,

2H), 4.43-4.47 (m, 1H), 7.46-7.50 (m, 2H), 7.57-7.61 (m, 1H), 7.91-7.93 (m, 2H) ppm.

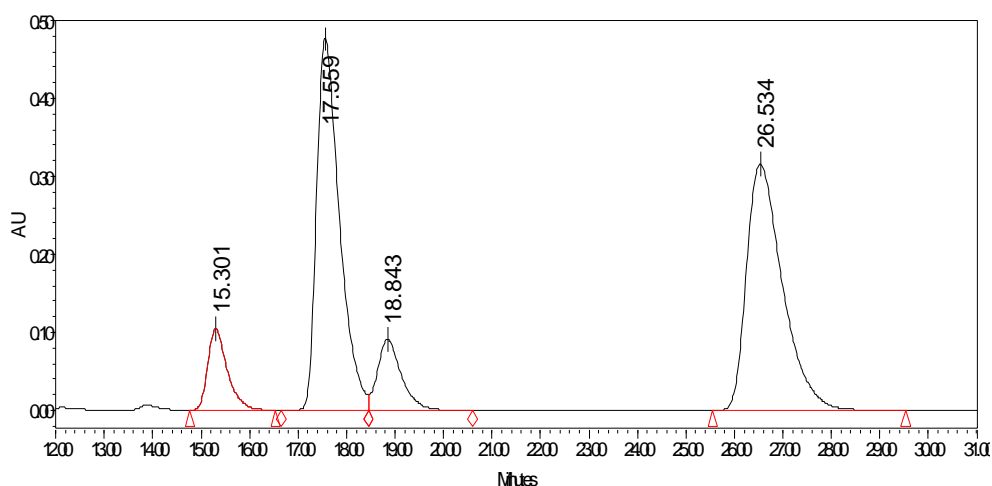



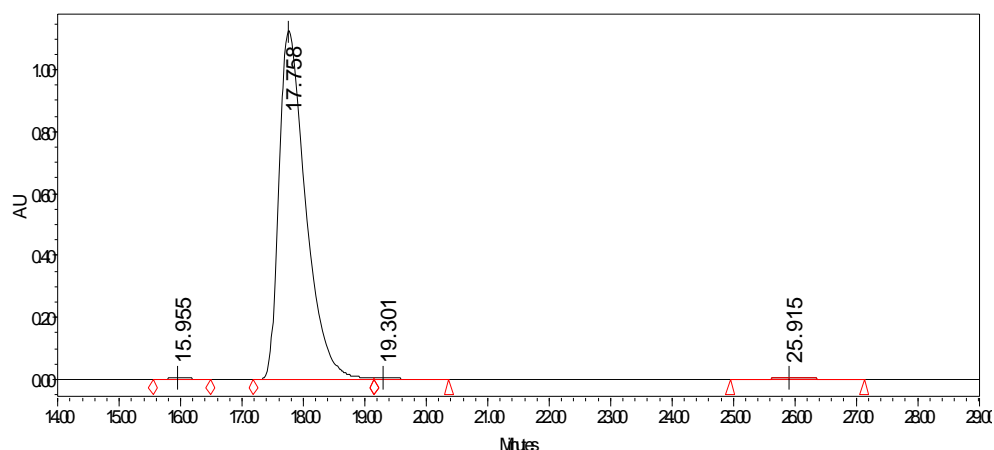

|   | Retention Time | Area     | % Area | Height  | % Height | Start Time | End Time |
|---|----------------|----------|--------|---------|----------|------------|----------|
| 1 | 15.955         | 161177   | 0.46   | 6309    | 0.55     | 15.550     | 16.483   |
| 2 | 17.758         | 34296803 | 98.29  | 1124839 | 98.50    | 17.183     | 19.150   |
| 3 | 19.301         | 149116   | 0.43   | 5060    | 0.44     | 19.150     | 20.433   |
| 4 | 25.915         | 285161   | 0.82   | 5762    | 0.50     | 25.133     | 27.283   |

**Configuration Assignment:** The absolute and relative configurations were determined by the comparison of the optical rotation and  $^1\text{H}$  NMR Spectra. <sup>2</sup>

**(2*S*,3*S*)-ethyl 3-benzoyl-2-hydroxypentanoate (*syn*-5ad)**

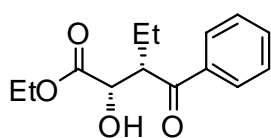

( $\text{C}_{14}\text{H}_{18}\text{O}_4$ ) a slightly yellow liquid; 70% yield, *anti/syn* = 60:40, -74% ee (*anti*), 52% ee (*syn*).  $[\alpha]_{\text{D}}^{25} = -16.8$  (*c* 0.274 in  $\text{CH}_2\text{Cl}_2$ ) HPLC DAICEL CHIRALCEL

***syn*-5ad**

AS-H, 2-propanol/*n*-hexane = 20/80, flow rate = 0.5 mL/min,  $\lambda = 254$  nm,

retention time: 15.3 min, 17.5 min, 18.8 min and 26.5 min;  $^1\text{H}$  NMR (400 MHz,  $\text{CDCl}_3$ ) *syn*: 0.93 (t, *J* = 7.6 Hz, 3H), 1.20 (t, *J* = 7.2 Hz, 3H), 1.84-2.0 (m, 2H), 3.14 (m, 1H), 3.82-3.85 (m, 1H), 4.19-4.23 (m, 2H), 4.50-4.51 (m, 1H), 7.46-7.50 (m, 2H), 7.57-7.61 (m, 1H), 7.91-7.93 (m, 2H) ppm.

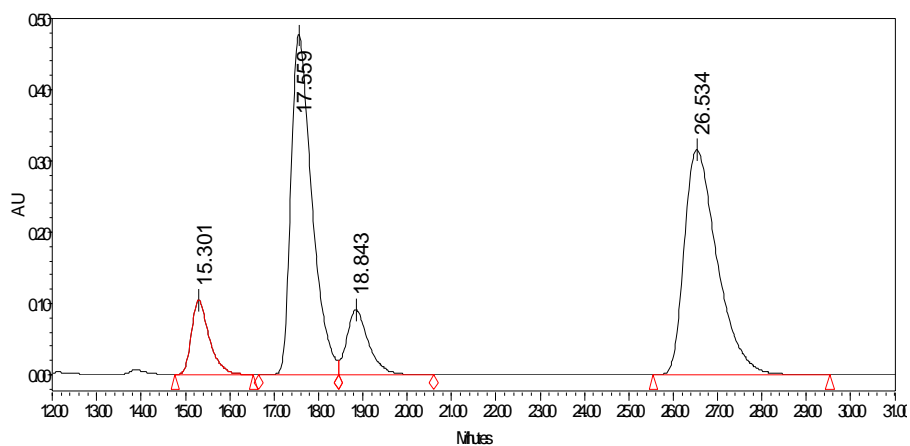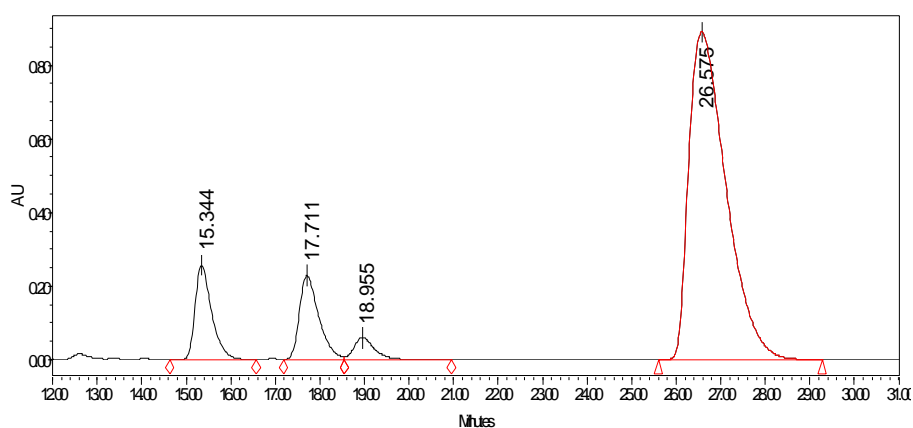

|   | Retention Time | Area     | % Area | Height | % Height | Start Time | End Time |
|---|----------------|----------|--------|--------|----------|------------|----------|
| 1 | 15.344         | 6676634  | 9.90   | 256872 | 17.89    | 14.633     | 16.567   |
| 2 | 17.711         | 6947408  | 10.31  | 228179 | 15.89    | 17.183     | 18.550   |
| 3 | 18.955         | 1966377  | 2.92   | 60354  | 4.20     | 18.550     | 20.950   |
| 4 | 26.575         | 51821550 | 76.87  | 890475 | 62.02    | 25.600     | 29.283   |

### (F) Copies of NMR Spectra for New Compounds

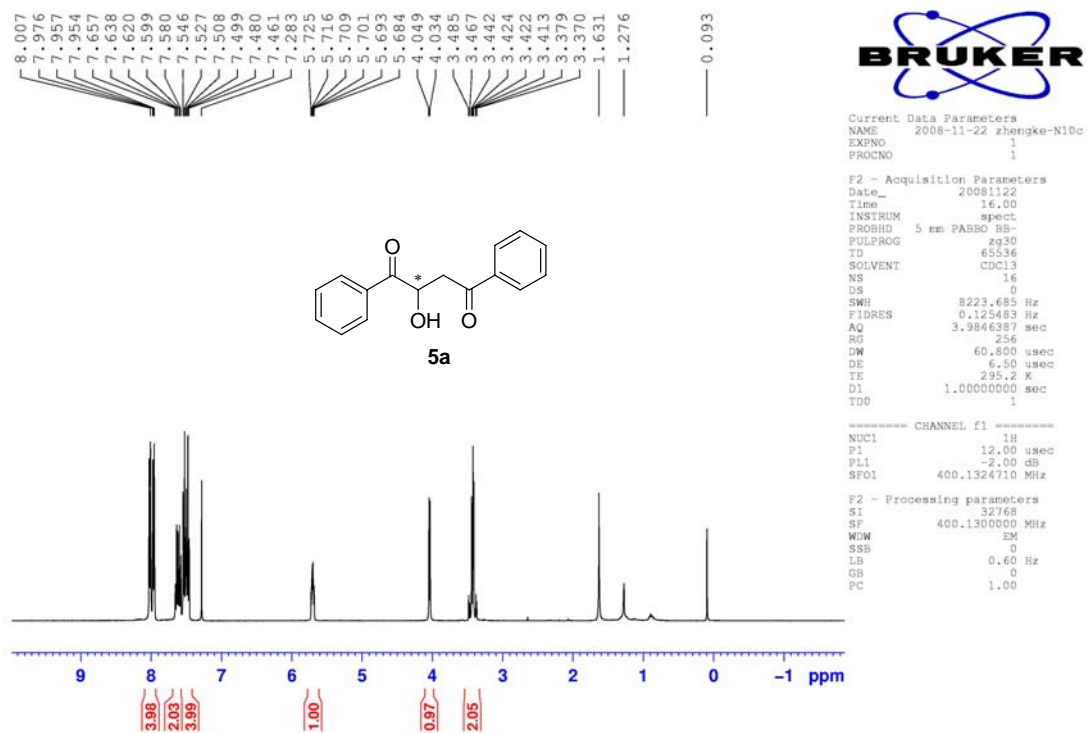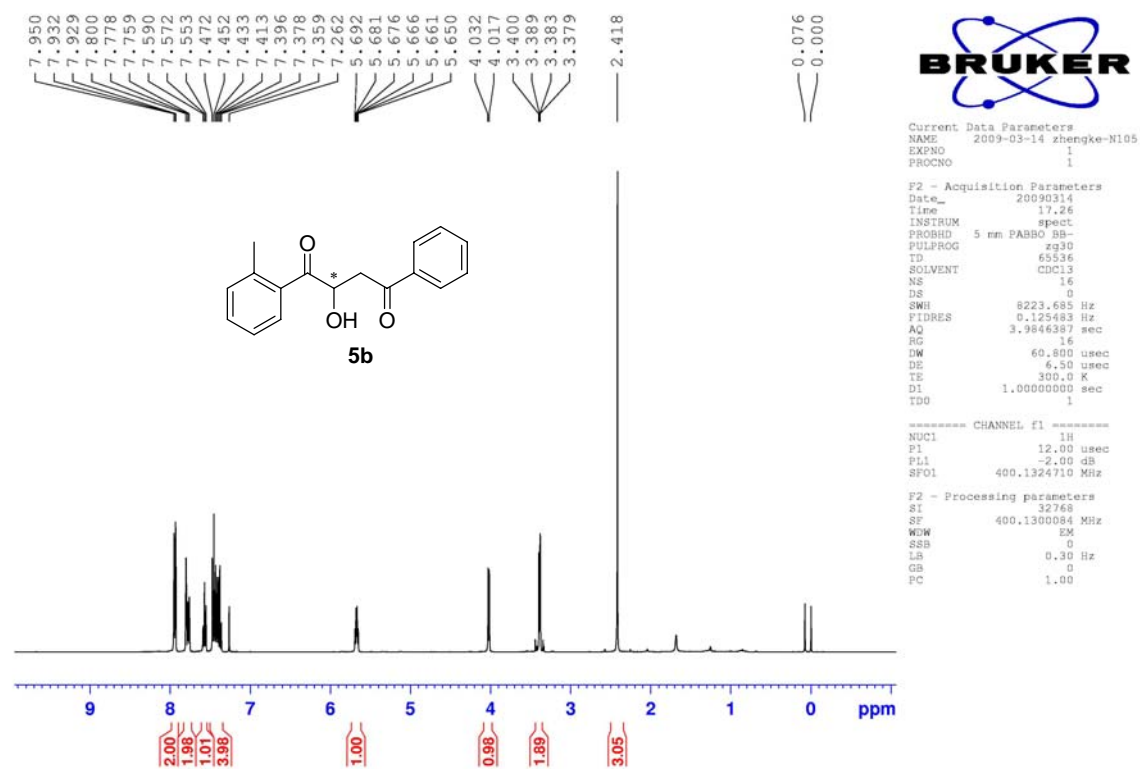

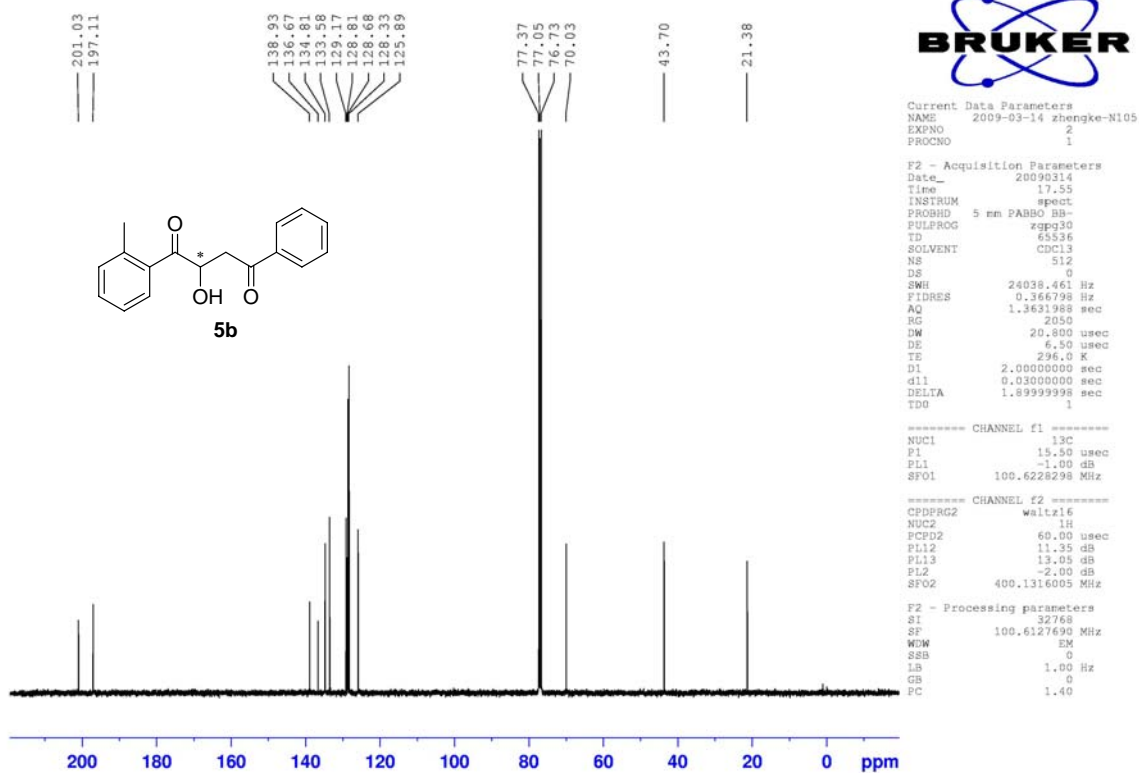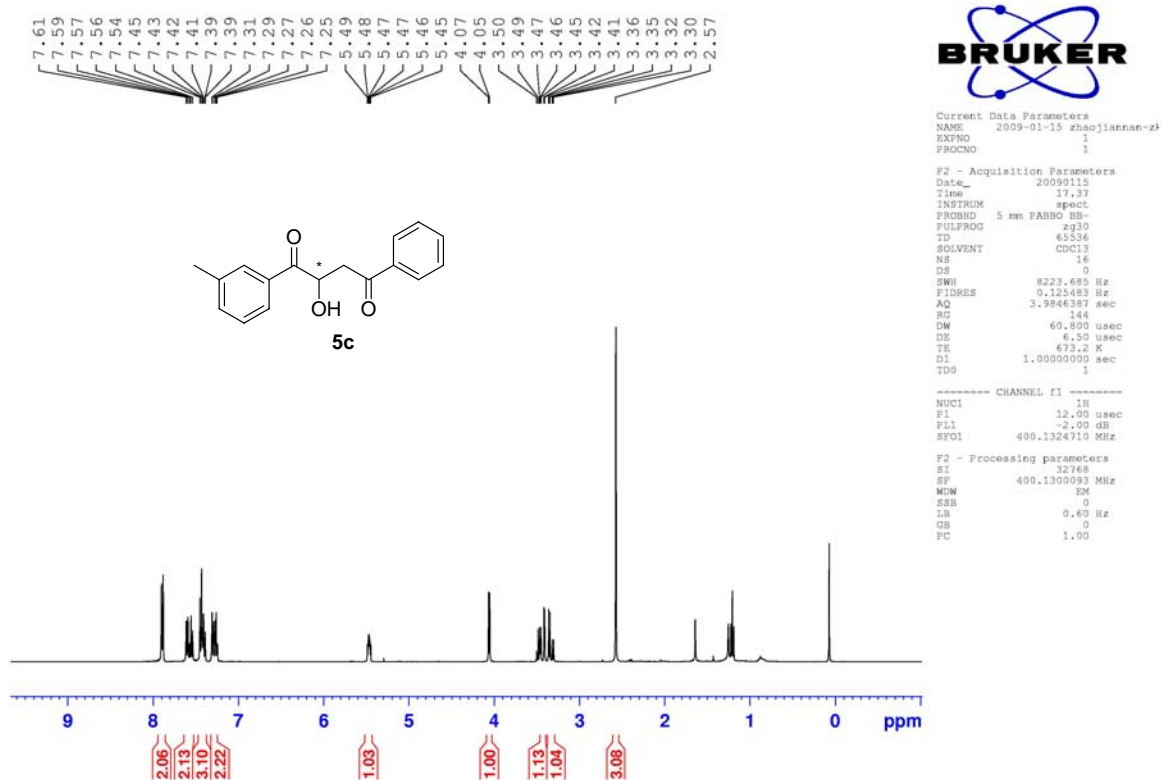

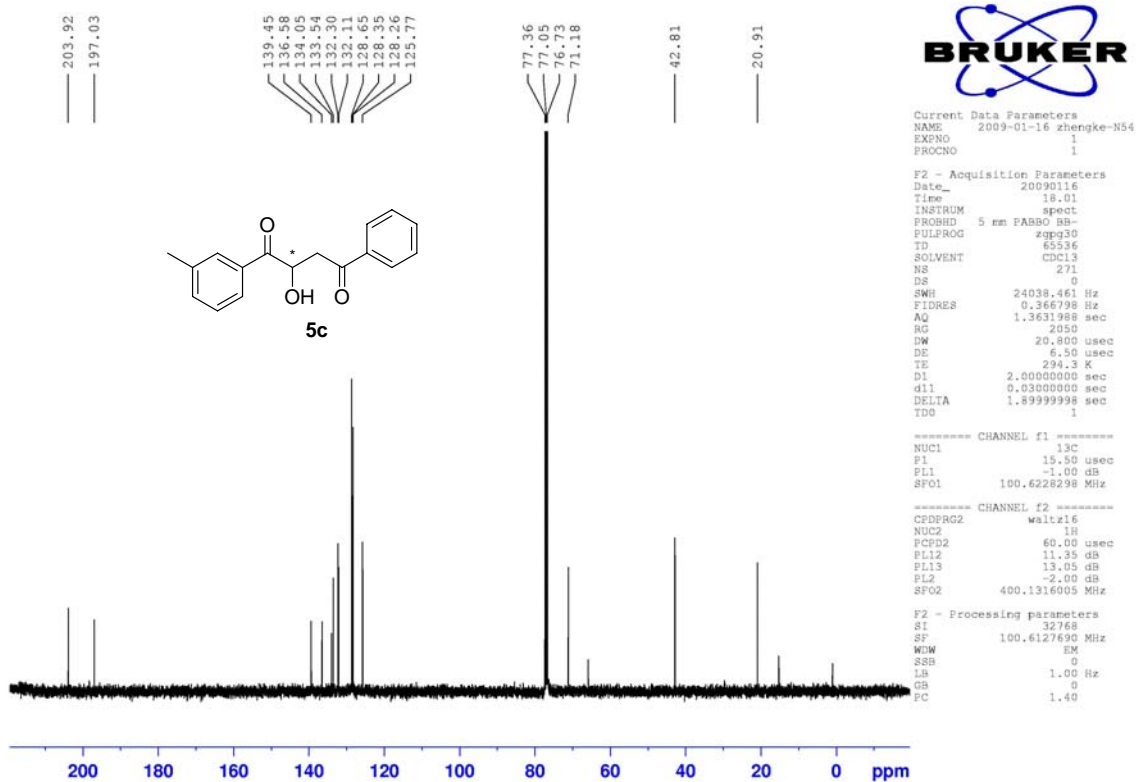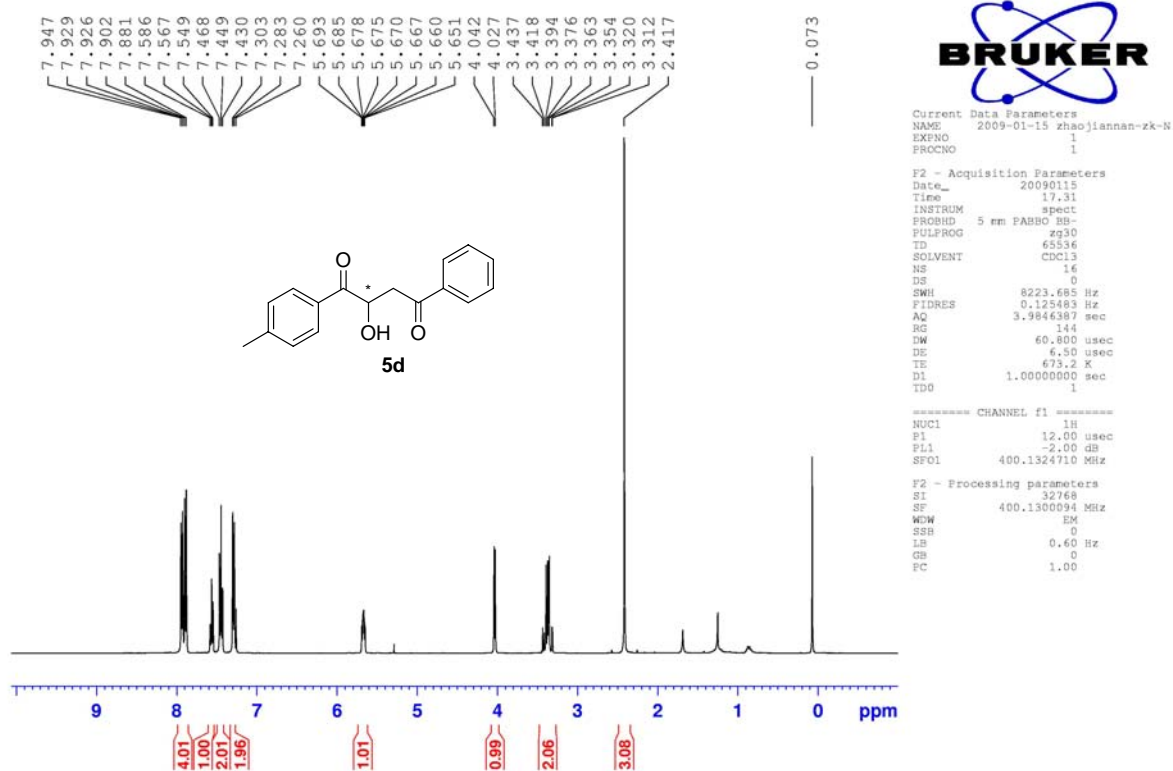

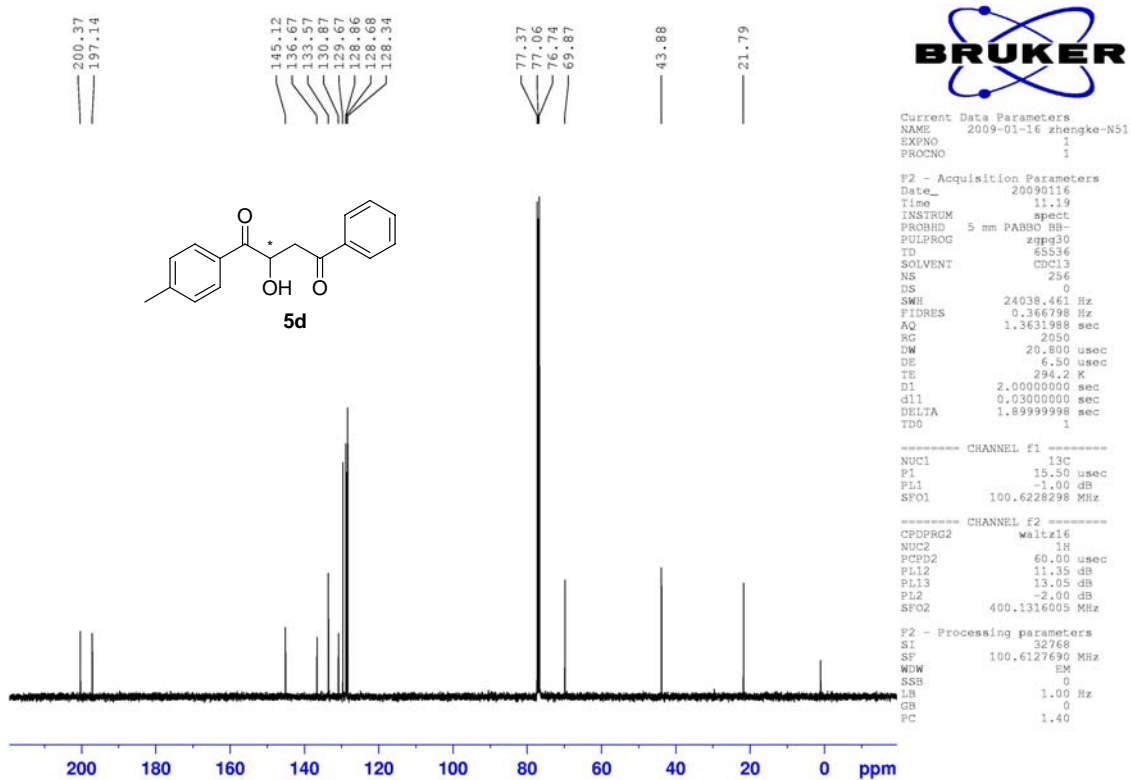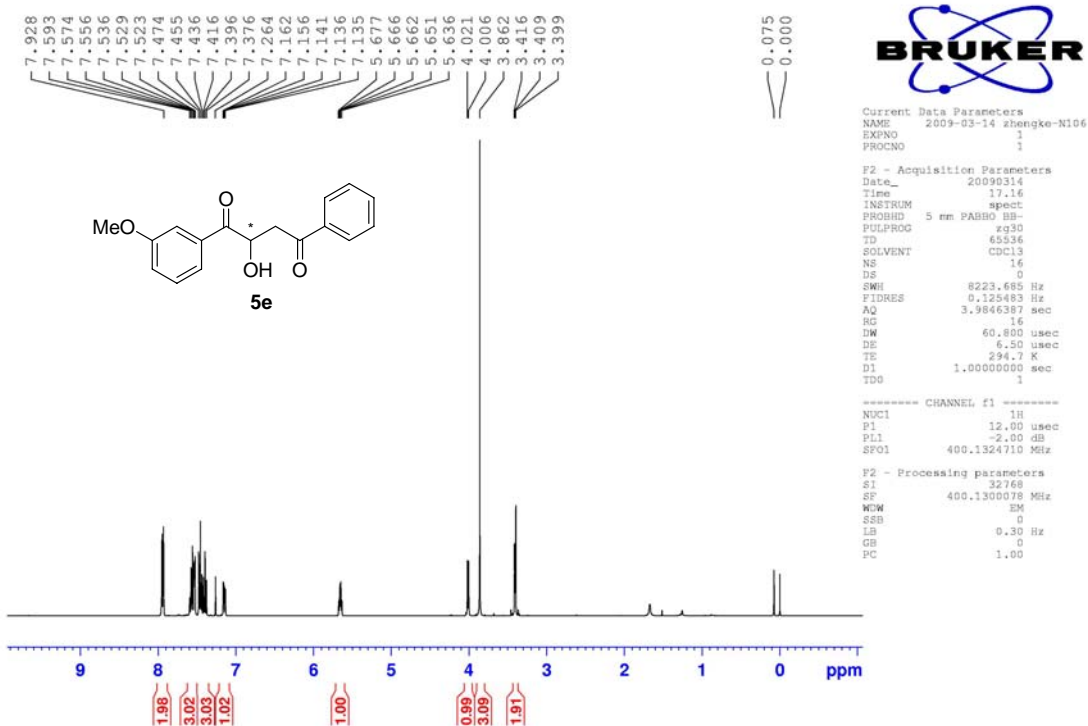

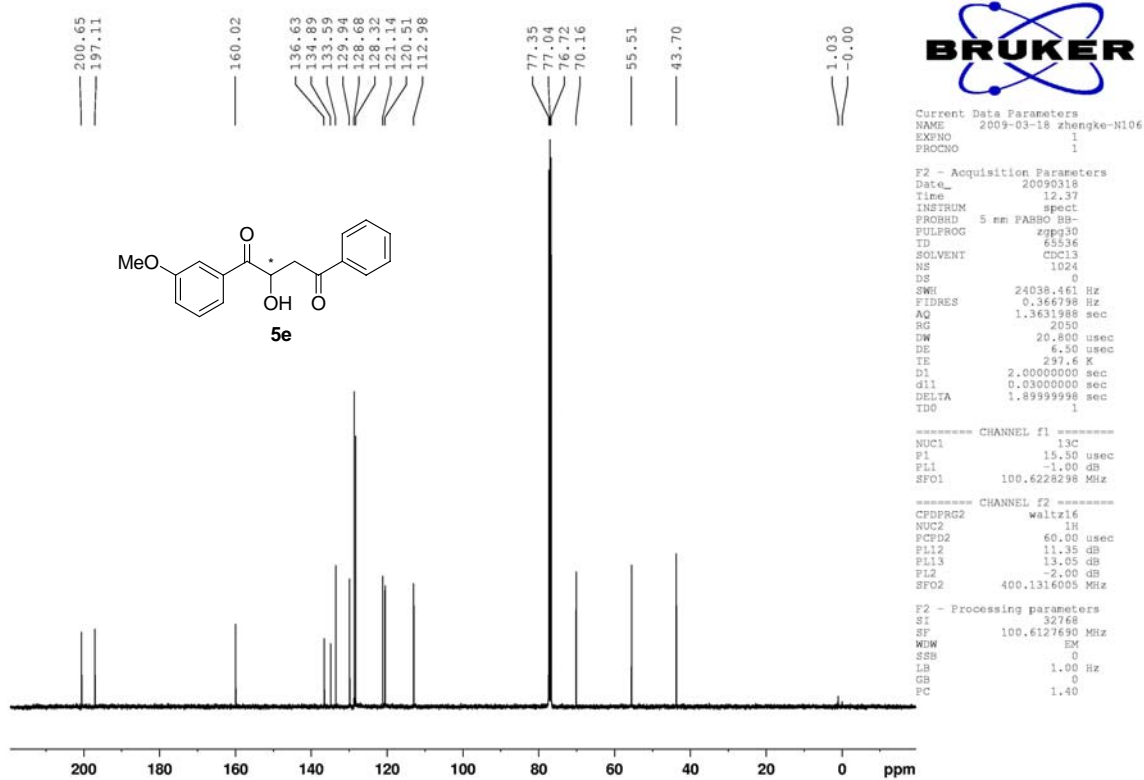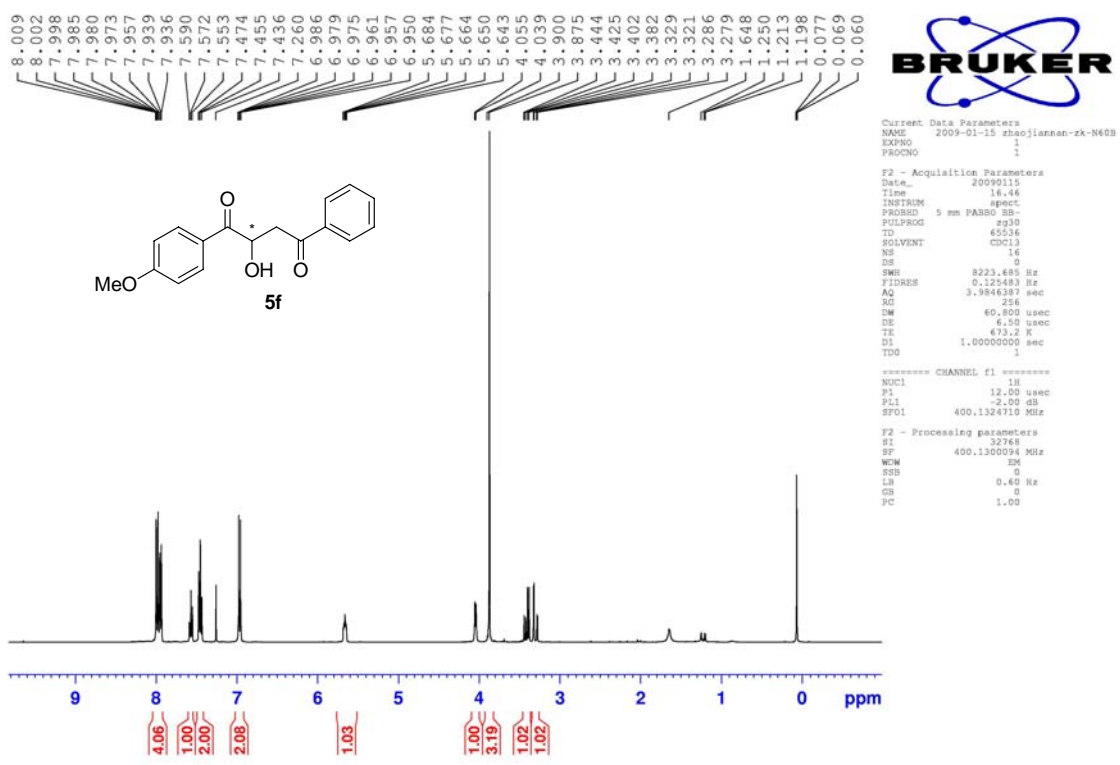



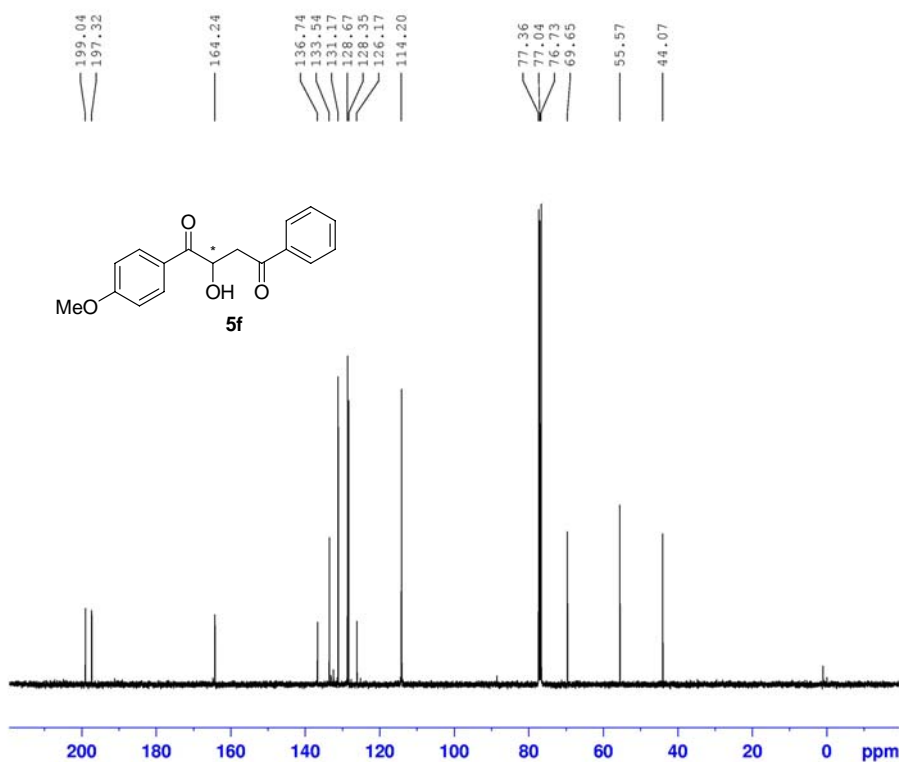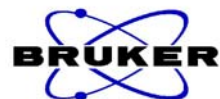

Current Data Parameters  
NAME 2009-03-17 zhengke-N107  
EXPNO 1  
PROCNO 1

F2 - Acquisition Parameters  
Date\_ 20090317  
Time 17.32  
INSTRUM spect  
PROBHD 5 mm PABBO BB-  
PULPROG zgpg30  
ID 65536  
SOLVENT CDCl3  
NS 512  
DS 0  
SWH 24038.461 Hz  
FIDRES 0.366798 Hz  
AQ 1.3631988 sec  
RG 2050  
DW 20.800 usec  
DE 6.50 usec  
TE 297.9 K  
D1 2.0000000 sec  
d11 0.0300000 sec  
DELTA 1.89999999 sec  
TD 1

===== CHANNEL f1 =====  
NUC1 13C  
P1 15.50 usec  
PL1 -1.00 dB  
SFO1 100.6228298 MHz

===== CHANNEL f2 =====  
CFDPRG2 waltz16  
NUC2 1H  
FCD2 60.00 usec  
PL12 11.35 dB  
PL13 13.05 dB  
PL2 -2.00 dB  
SFO2 400.1316005 MHz

F2 - Processing parameters  
SI 32768  
SF 100.6127690 MHz  
WDW EM  
SSB 0  
LB 1.00 Hz  
GB 0  
PC 1.40

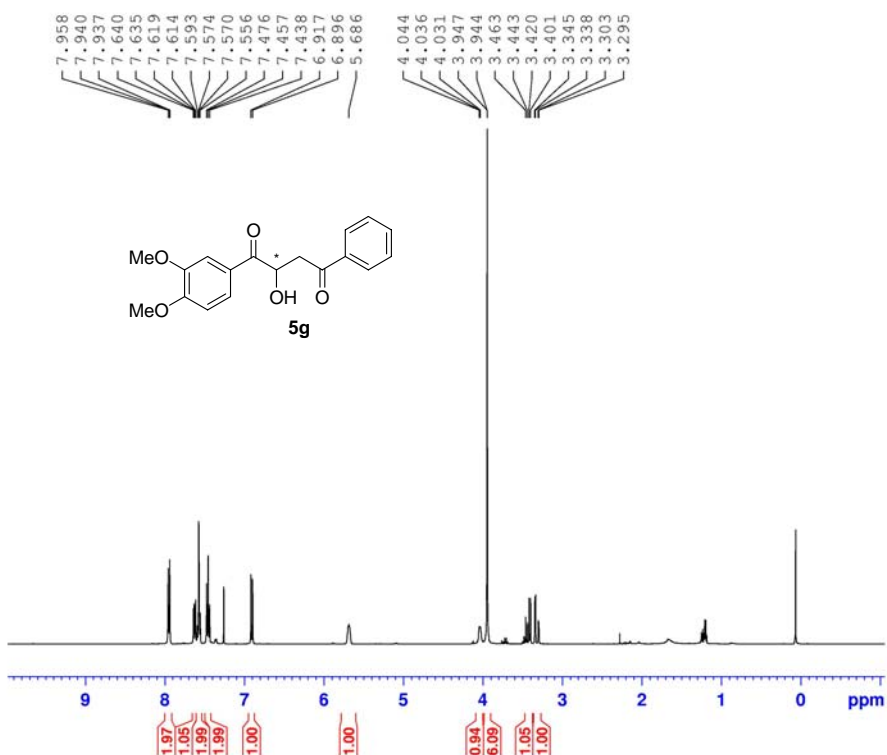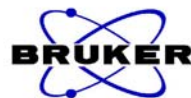

Current Data Parameters  
NAME 2009-01-15 zhaojiannan-zk-N  
EXPNO 1  
PROCNO 1

F2 - Acquisition Parameters  
Date\_ 20090115  
Time 15.52  
INSTRUM spect  
PROBHD 5 mm PABBO BB-  
PULPROG zg30  
ID 65536  
SOLVENT CDCl3  
NS 16  
DS 0  
SWH 8223.685 Hz  
FIDRES 0.125483 Hz  
AQ 3.3846387 sec  
RG 256  
DW 60.800 usec  
DE 6.50 usec  
TE 673.2 K  
D1 1.0000000 sec  
TD 1

===== CHANNEL f1 =====  
NUC1 1H  
P1 12.00 usec  
PL1 -2.00 dB  
SFO1 400.1324710 MHz

F2 - Processing parameters  
SI 32768  
SF 400.1300094 MHz  
WDW EM  
SSB 0  
LB 0.60 Hz  
GB 0  
PC 1.00



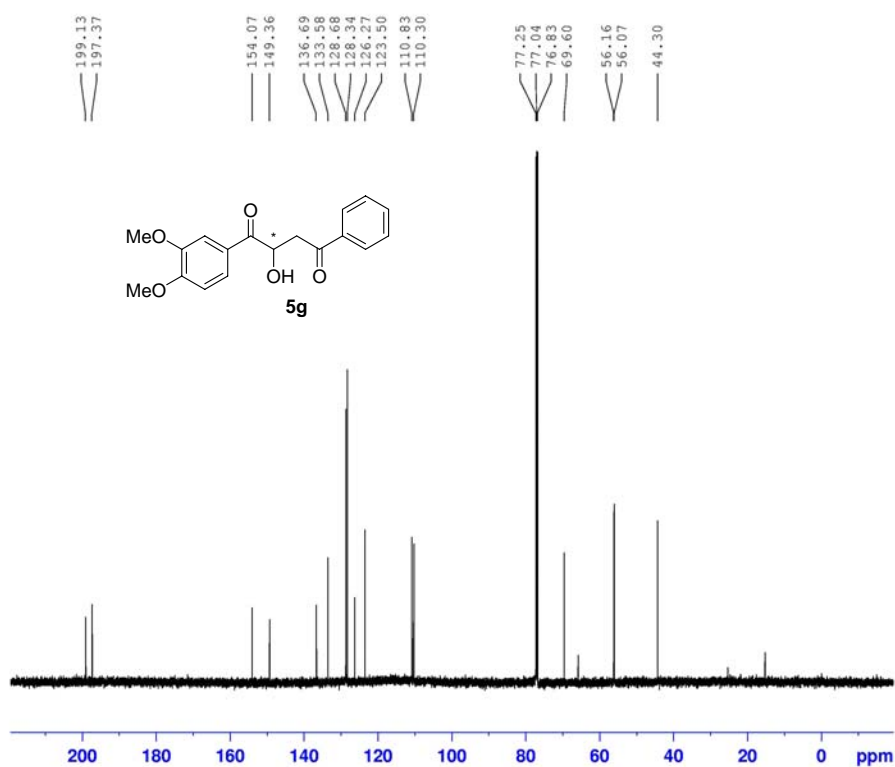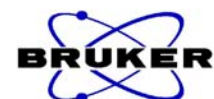

Current Data Parameters  
NAME 2009-03-10 zhengke-ZK-N91  
EXPNO 1  
PROCNO 1

F2 - Acquisition Parameters  
Date\_ 20090310  
Time 15.34  
INSTRUM spect  
PROBHD 5 mm PATXI 1H/  
PULPROG zgpg30  
TD 65536  
SOLVENT CDCl3  
NS 364  
DS 0  
SWH 36057.691 Hz  
FIDRES 0.350197 Hz  
AQ 0.9088159 sec  
RG 2050  
DW 11.867 usec  
DE 6.50 usec  
TE 300.0 K  
D1 2.0000000 sec  
d11 0.0300000 sec  
DELTA 1.8999998 sec  
TDO 0

----- CHANNEL F1 -----  
NUC1 13C  
P1 11.50 usec  
PL1 -3.00 dB  
SFO1 150.9178988 MHz

----- CHANNEL F2 -----  
CPDPRG2 waltz16  
NUC2 1H  
PCPD2 80.00 usec  
PL12 19.50 dB  
PL13 19.50 dB  
PL2 -1.00 dB  
SFO2 600.1324005 MHz

F2 - Processing parameters  
SI 32768  
SF 150.9028090 MHz  
WDM EM  
SBB 0  
LB 1.00 Hz  
GB 0  
PC 1.40

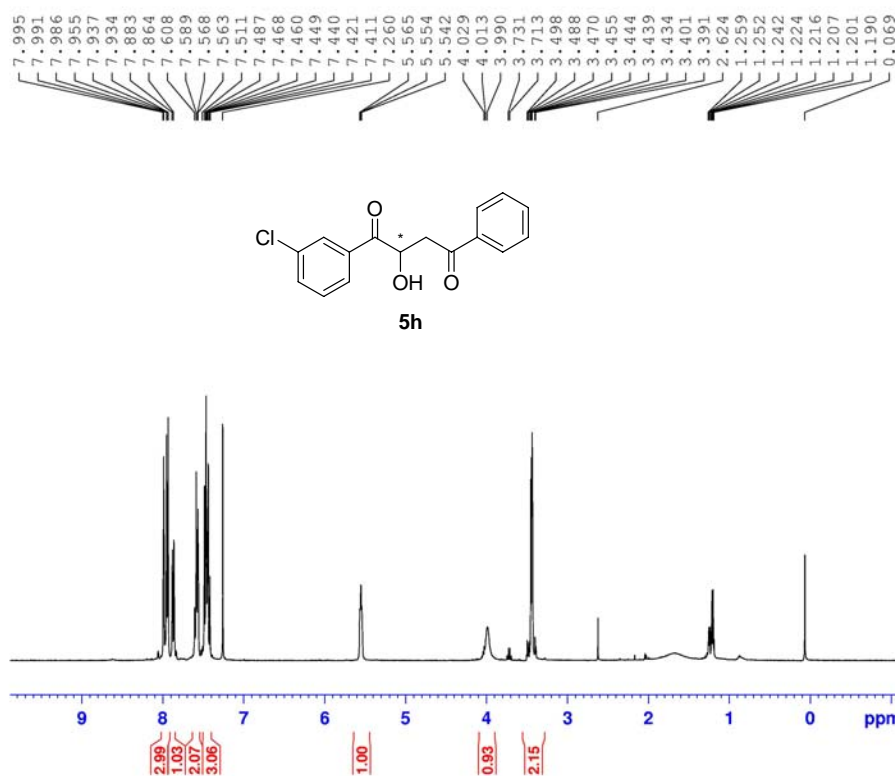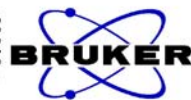

Current Data Parameters  
NAME 2009-01-15 zhaojianan-zk-1  
EXPNO 1  
PROCNO 1

F2 - Acquisition Parameters  
Date\_ 20090115  
Time 16.30  
INSTRUM spect  
PROBHD 5 mm F4BBO BB-  
PULPROG zg30  
TD 65536  
SOLVENT CDCl3  
NS 16  
DS 0  
SWH 8023.685 Hz  
FIDRES 0.125483 Hz  
AQ 3.9846387 sec  
RG 362  
DW 60.800 usec  
DE 6.50 usec  
TE 273.2 K  
D1 1.0000000 sec  
TDO 1

----- CHANNEL F1 -----  
NUC1 1H  
P1 12.00 usec  
PL1 -2.00 dB  
SFO1 400.1324710 MHz

F2 - Processing parameters  
SI 32768  
SF 400.1300994 MHz  
WDM EM  
SBB 0  
LB 0.60 Hz  
GB 0  
PC 1.00

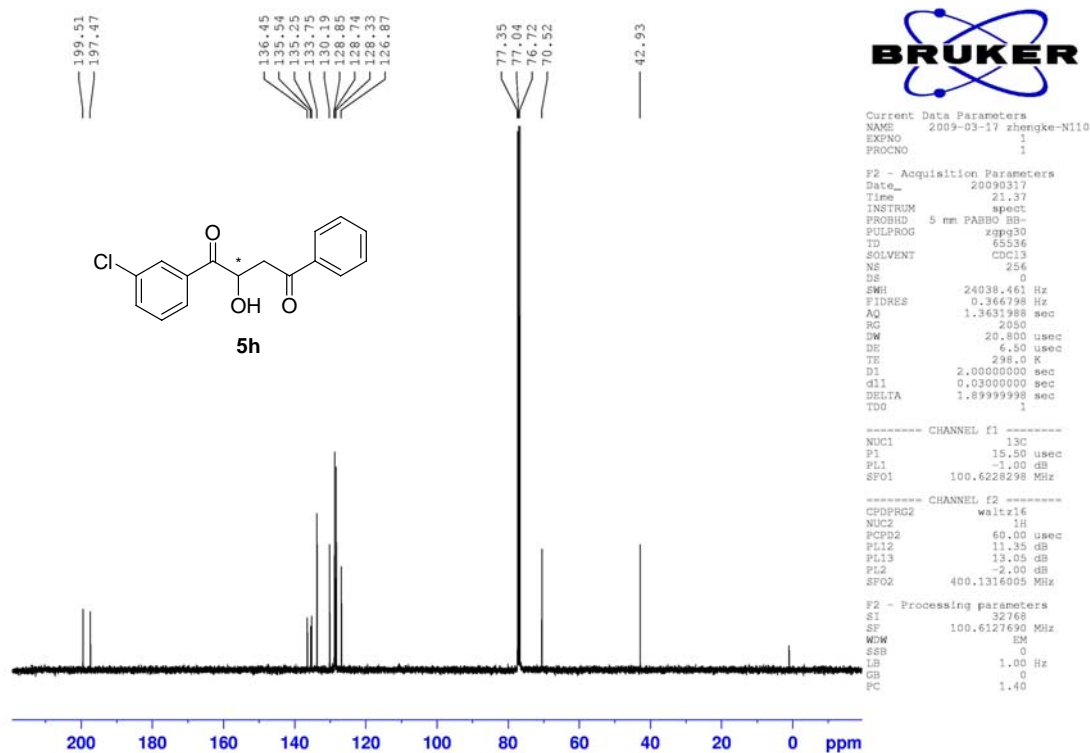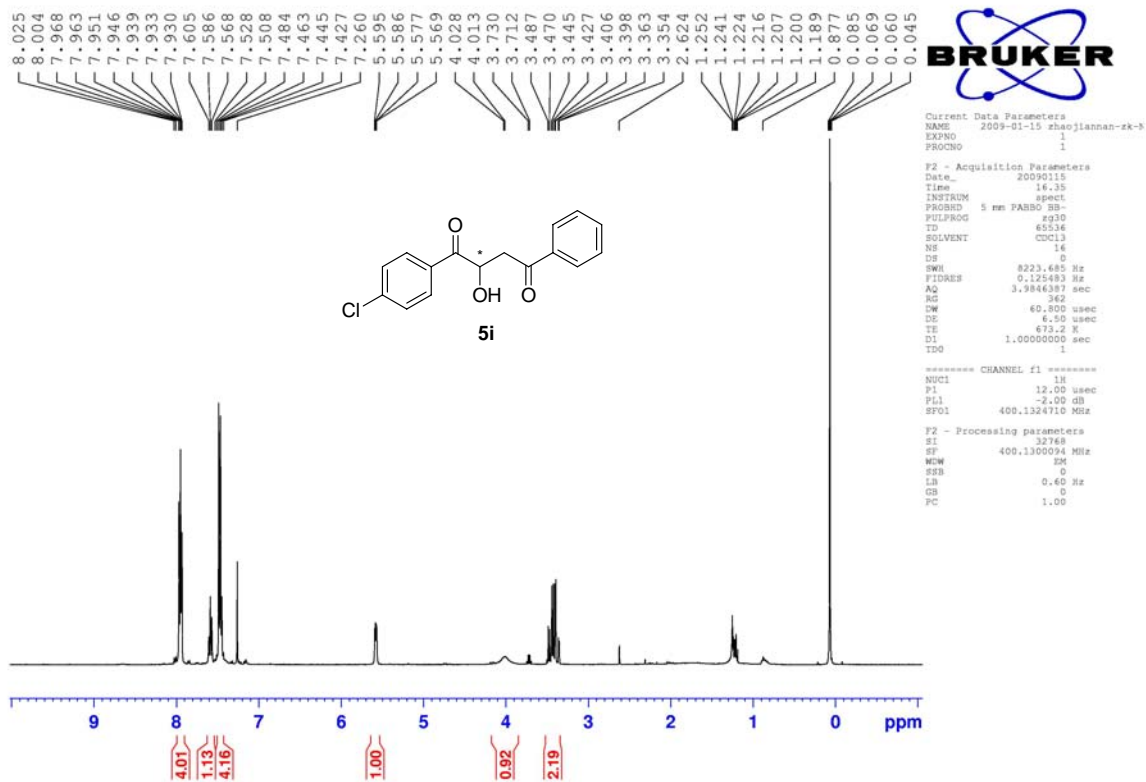

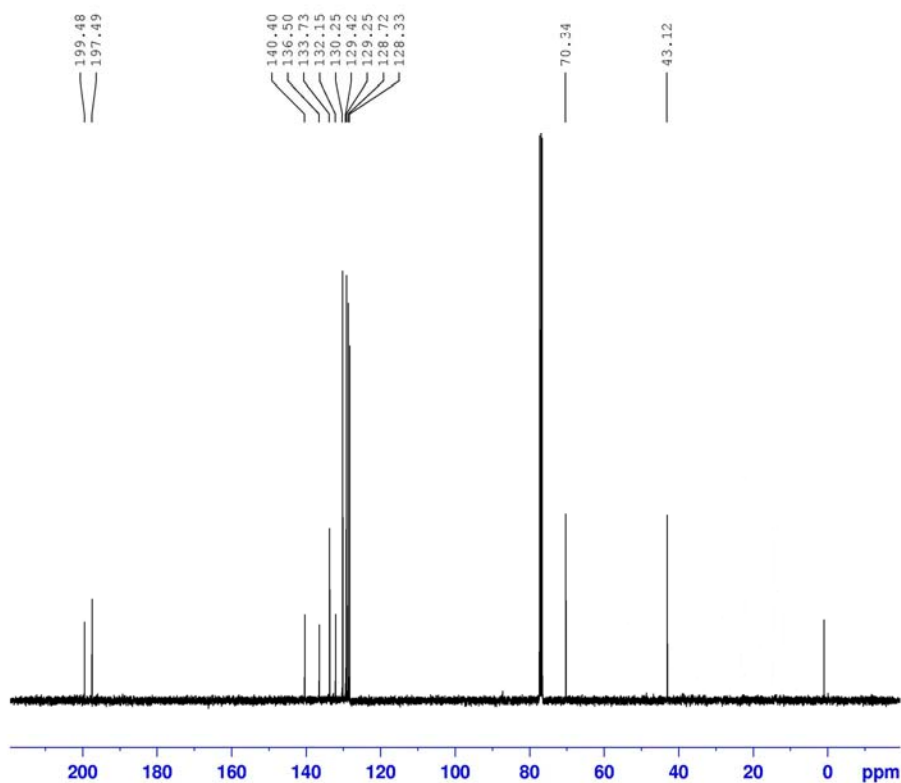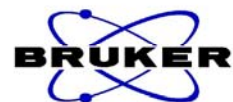

Current Data Parameters  
 NAME 2009-03-17 zhengke-N109  
 EXPNO 1  
 PROCNO 1

F2 - Acquisition Parameters  
 Date\_ 20090317  
 Time 21.03  
 INSTRUM spect  
 PROBHD 5 mm PABBO BB-  
 PULPROG zgpg30  
 ID 65536  
 SOLVENT CDCl3  
 NS 512  
 DS 0  
 SWH 24038.461 Hz  
 FIDRES 0.366798 Hz  
 AQ 1.3631988 sec  
 RG 2050  
 DW 20.800 usec  
 DE 6.50 usec  
 TE 297.7 K  
 D1 2.0000000 sec  
 d11 0.0300000 sec  
 DELTA 1.89999998 sec  
 TDO 1

===== CHANNEL f1 =====  
 NUC1 13C  
 P1 15.50 usec  
 PL1 -1.00 dB  
 SFO1 100.6228298 MHz

===== CHANNEL f2 =====  
 CPDPRG2 waltz16  
 NUC2 1H  
 PCPD2 60.00 usec  
 PL12 11.35 dB  
 PL13 13.05 dB  
 PL2 -2.00 dB  
 SFO2 400.1316005 MHz

F2 - Processing parameters  
 SI 32768  
 SF 100.6127690 MHz  
 WDW EM  
 SSB 0  
 LB 1.00 Hz  
 GB 0  
 PC 1.40

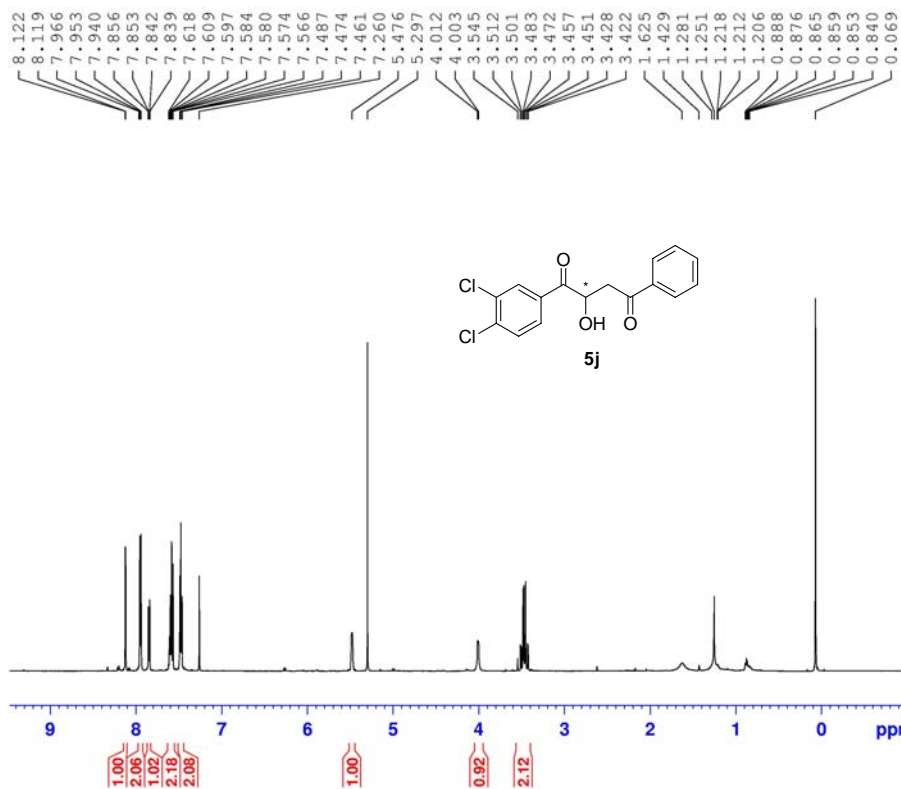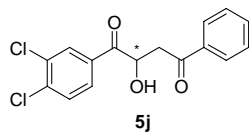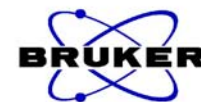

Current Data Parameters  
 NAME 2009-01-15 zhenke-N64  
 EXPNO 1  
 PROCNO 1

F2 - Acquisition Parameters  
 Date\_ 20090115  
 Time 18.11  
 INSTRUM spect  
 PROBHD 5 mm PATXI 1H/  
 PULPROG zg30  
 ID 65536  
 SOLVENT CDCl3  
 NS 16  
 DS 0  
 SWH 12335.526 Hz  
 FIDRES 0.188225 Hz  
 AQ 2.6564496 sec  
 RG 203  
 DW 40.533 usec  
 DE 6.50 usec  
 TE 293.8 K  
 D1 1.0000000 sec  
 TDO 1

===== CHANNEL f1 =====  
 NUC1 1H  
 P1 7.20 usec  
 PL1 -1.00 dB  
 SFO1 600.1337060 MHz

F2 - Processing parameters  
 SI 32768  
 SF 600.1300096 MHz  
 WDW EM  
 SSB 0  
 LB 0.60 Hz  
 GB 0  
 PC 1.00

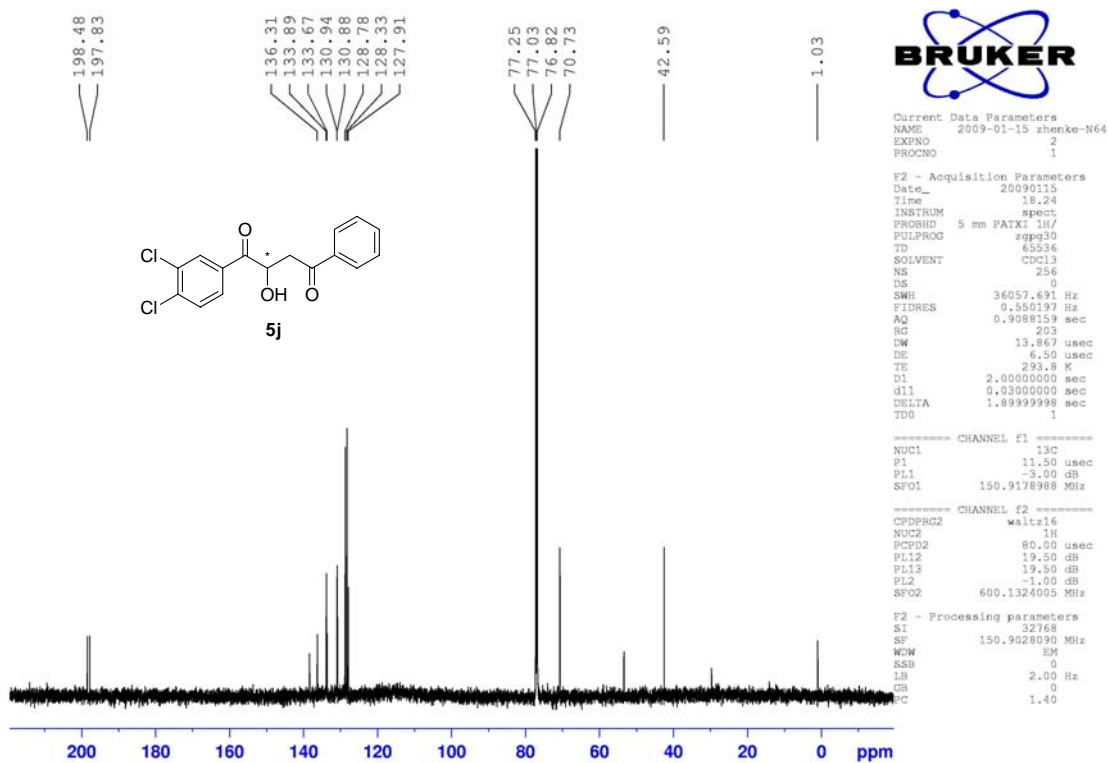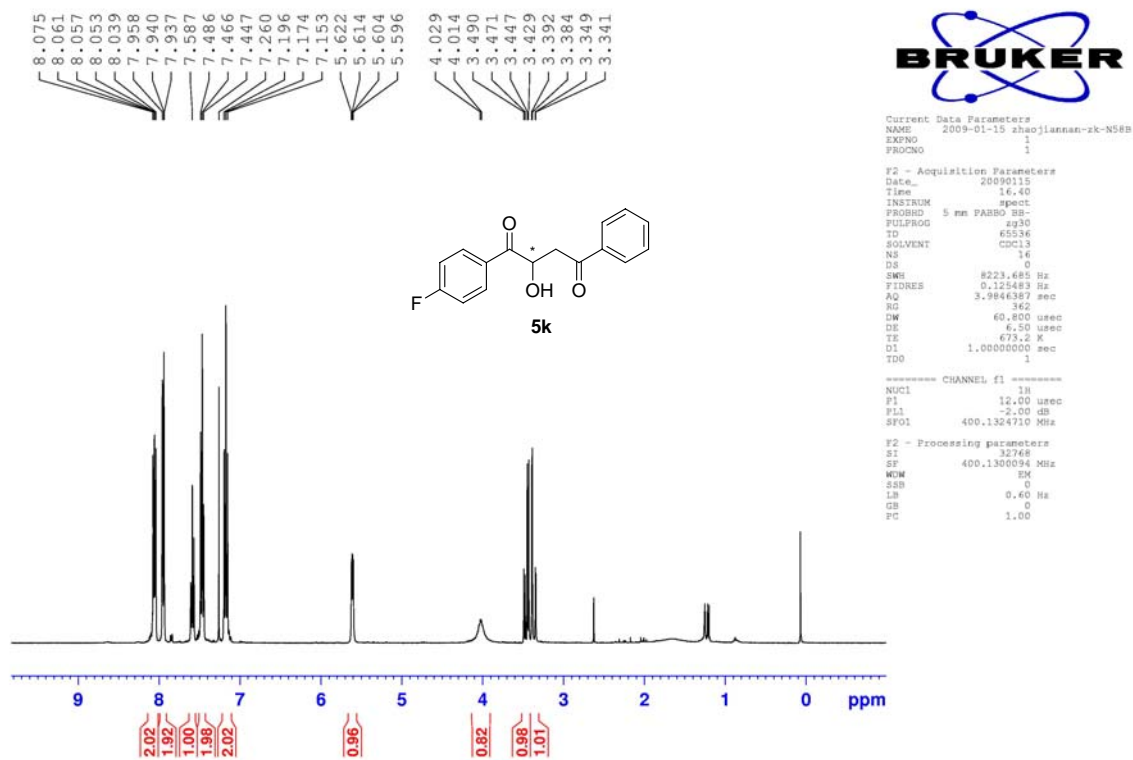

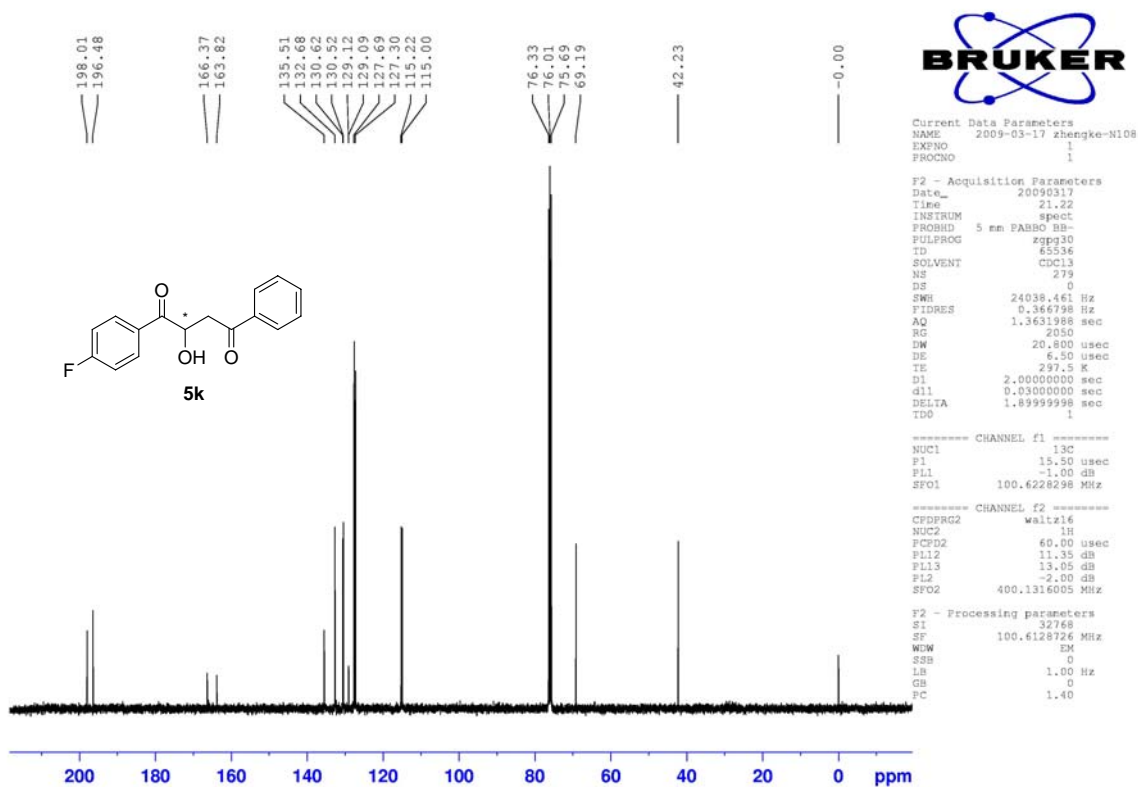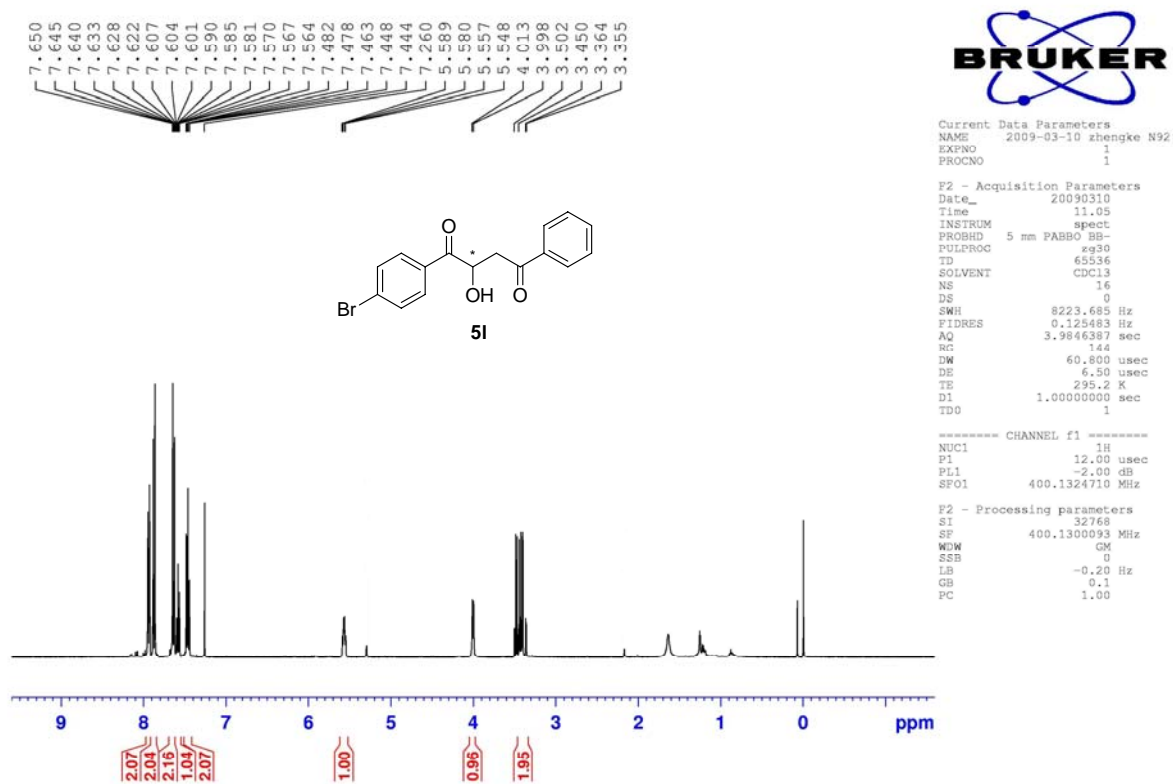

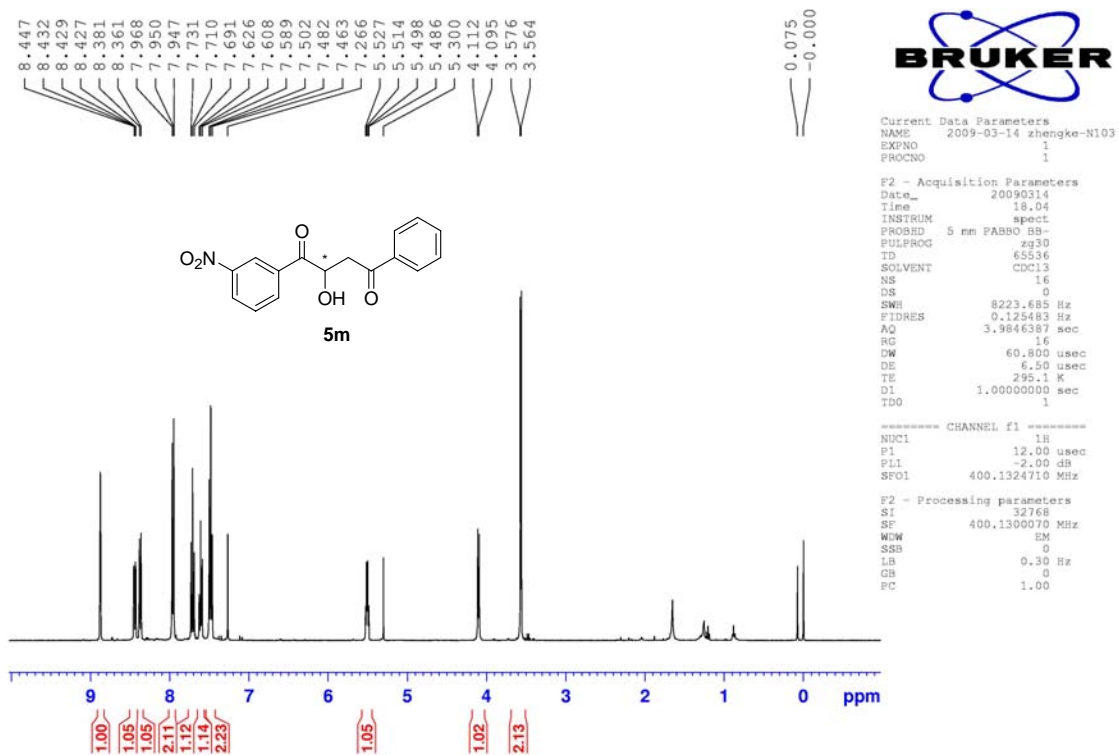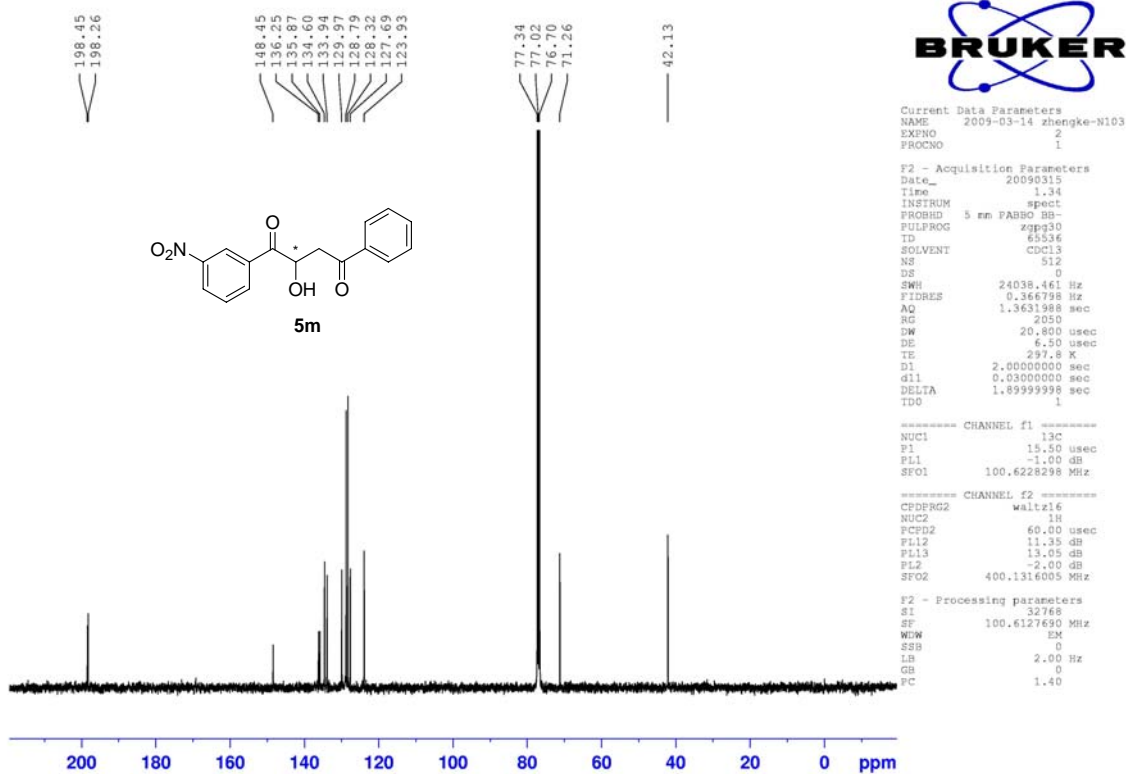



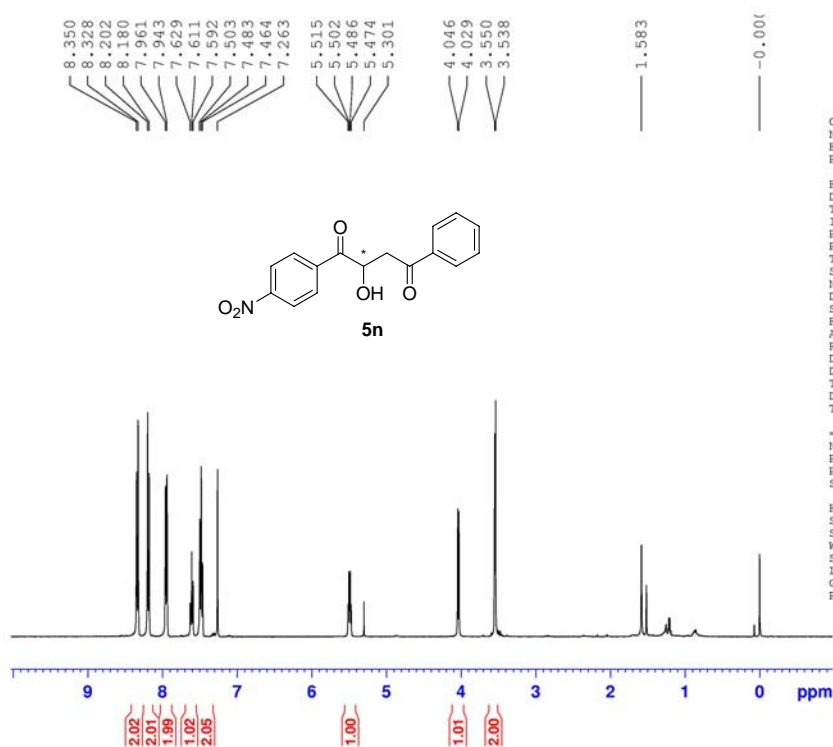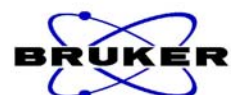

Current Data Parameters  
 NAME 2009-03-14 zhengke-N104  
 EXPNO 1  
 PROCNO 1

F2 - Acquisition Parameters  
 Date\_ 20090314  
 Time 17.21  
 INSTRUM spect  
 PROBHD 5 mm PABBO BB-  
 PULPROG zg30  
 TD 65536  
 SOLVENT CDCl3  
 NS 16  
 DS 0  
 SWH 8223.685 Hz  
 FIDRES 0.125483 Hz  
 AQ 3.9846387 sec  
 RG 16  
 DW 60.800 usec  
 DE 6.50 usec  
 TE 294.6 K  
 D1 1.00000000 sec  
 TD0 1

===== CHANNEL f1 =====  
 NUC1 1H  
 P1 12.00 usec  
 PL1 -2.00 dB  
 SFO1 400.1324710 MHz

F2 - Processing parameters  
 SI 32768  
 SF 400.1300081 MHz  
 WDW EM  
 SSB 0  
 LB 0.30 Hz  
 GB 0  
 PC 1.00

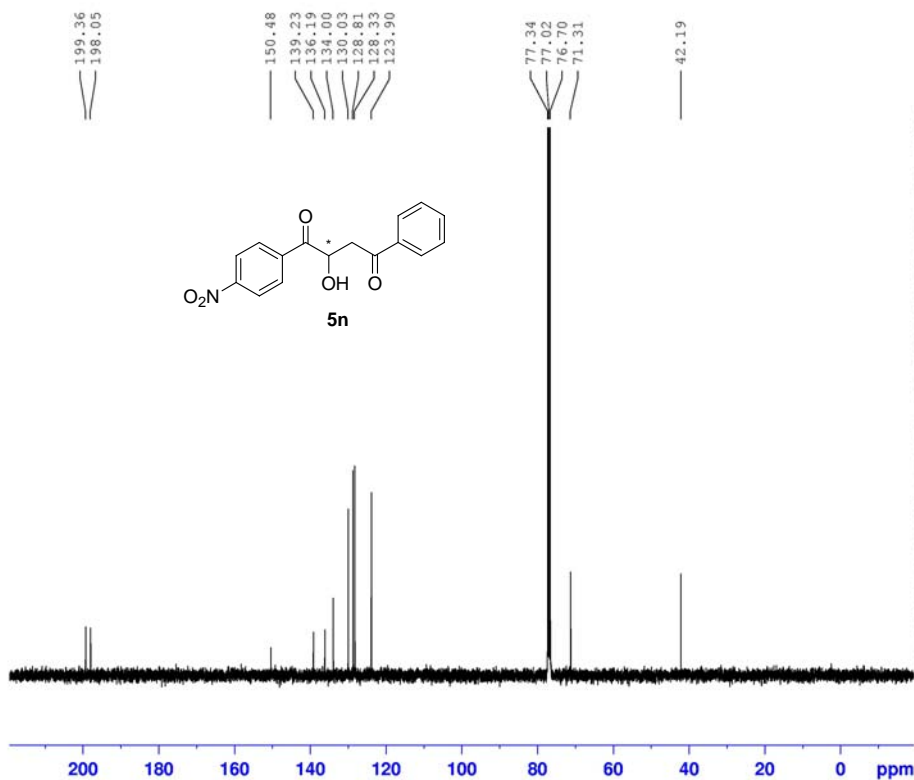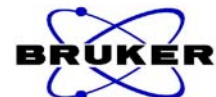

Current Data Parameters  
 NAME 2009-03-18 zhengke-N104  
 EXPNO 1  
 PROCNO 1

F2 - Acquisition Parameters  
 Date\_ 20090318  
 Time 11.20  
 INSTRUM spect  
 PROBHD 5 mm PABBO BB-  
 PULPROG zgpg30  
 TD 65536  
 SOLVENT CDCl3  
 NS 312  
 DS 0  
 SWH 24038.461 Hz  
 FIDRES 0.366798 Hz  
 AQ 1.3631988 sec  
 RG 2050  
 DW 20.800 usec  
 DE 6.50 usec  
 TE 297.4 K  
 D1 2.00000000 sec  
 d11 0.03000000 sec  
 DELTA 1.89999998 sec  
 TD0 1

===== CHANNEL f1 =====  
 NUC1 13C  
 P1 15.50 usec  
 PL1 -1.00 dB  
 SFO1 100.6228298 MHz

===== CHANNEL f2 =====  
 CPDPRG2 waltz16  
 NUC2 1H  
 PCDP2 60.00 usec  
 PL12 11.35 dB  
 PL13 13.05 dB  
 PL2 -2.00 dB  
 SFO2 400.1316005 MHz

F2 - Processing parameters  
 SI 32768  
 SF 100.6127690 MHz  
 WDW EM  
 SSB 0  
 LB 1.00 Hz  
 GB 0  
 PC 1.40

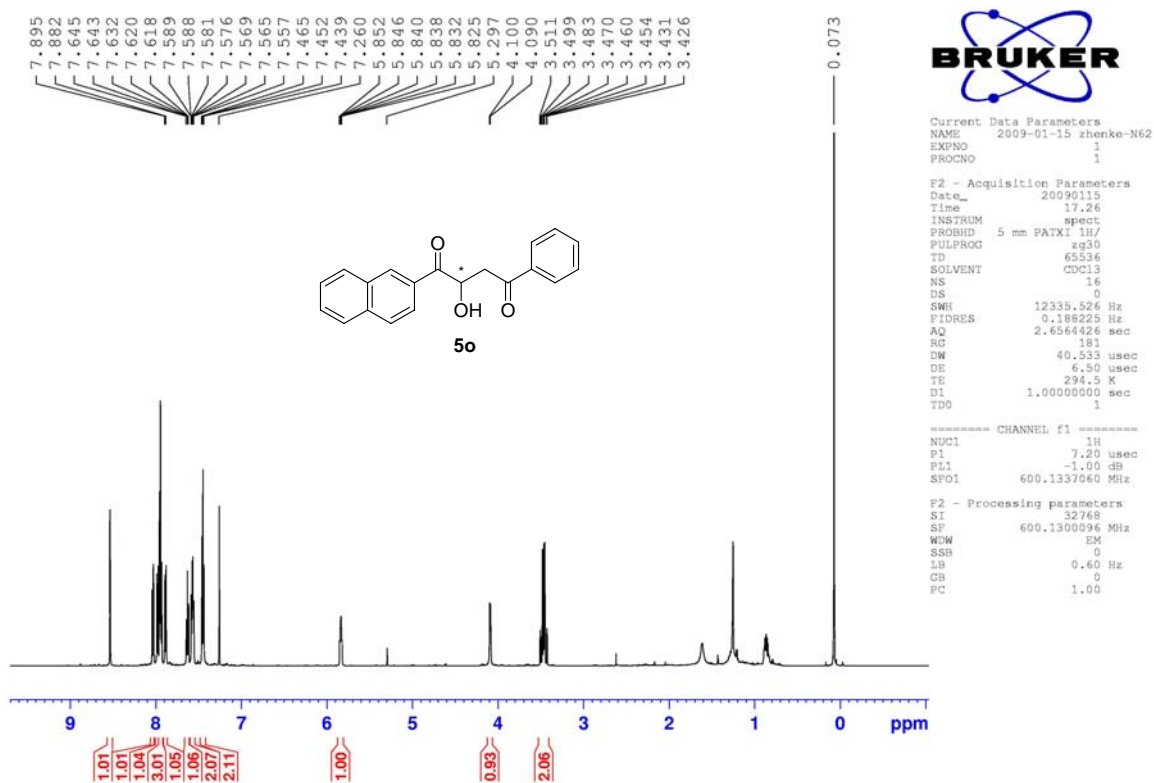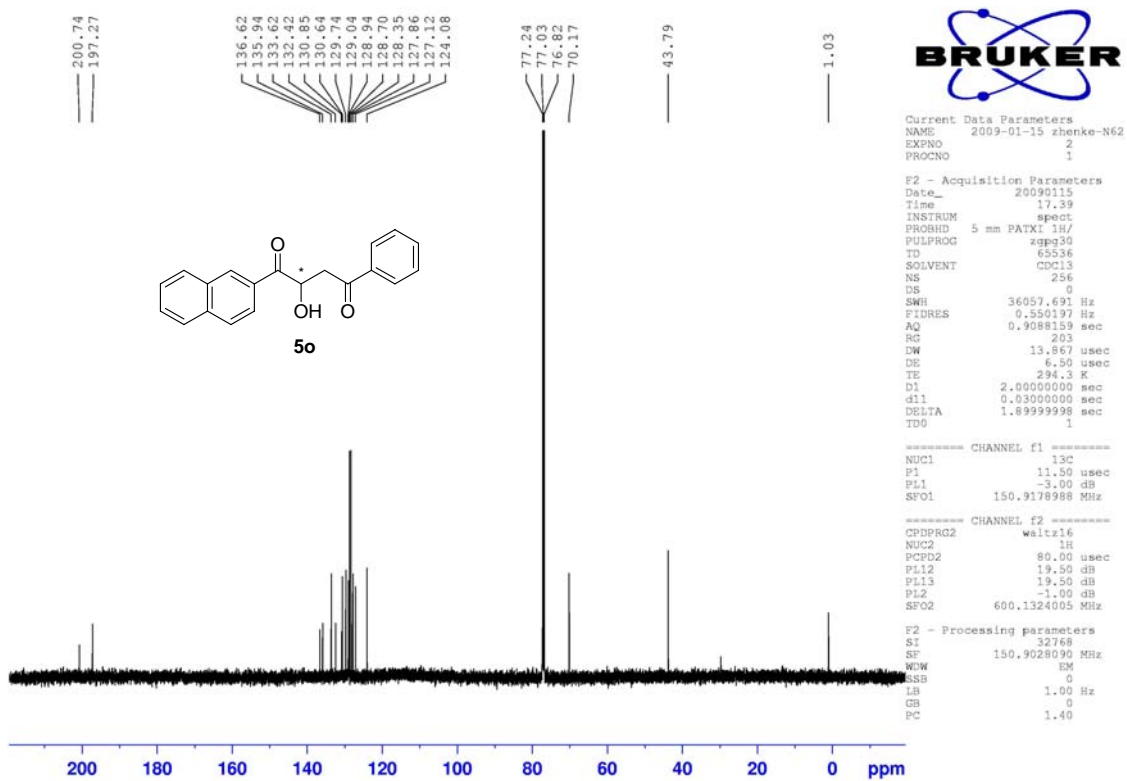



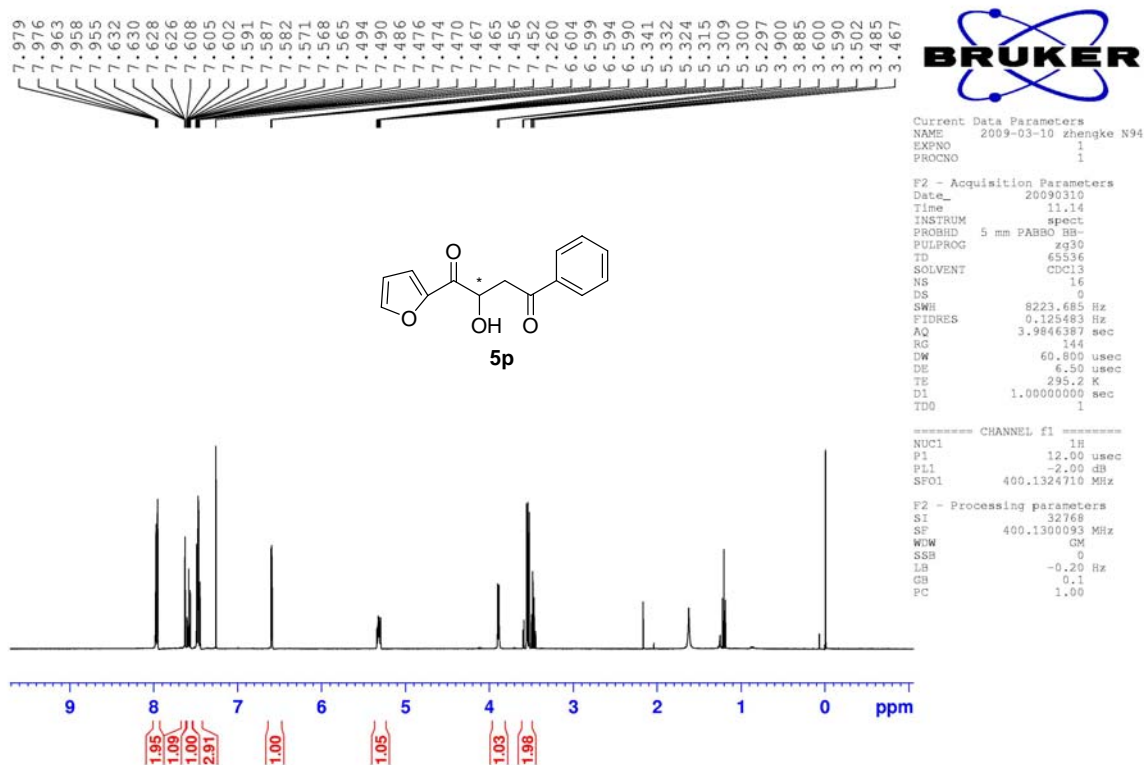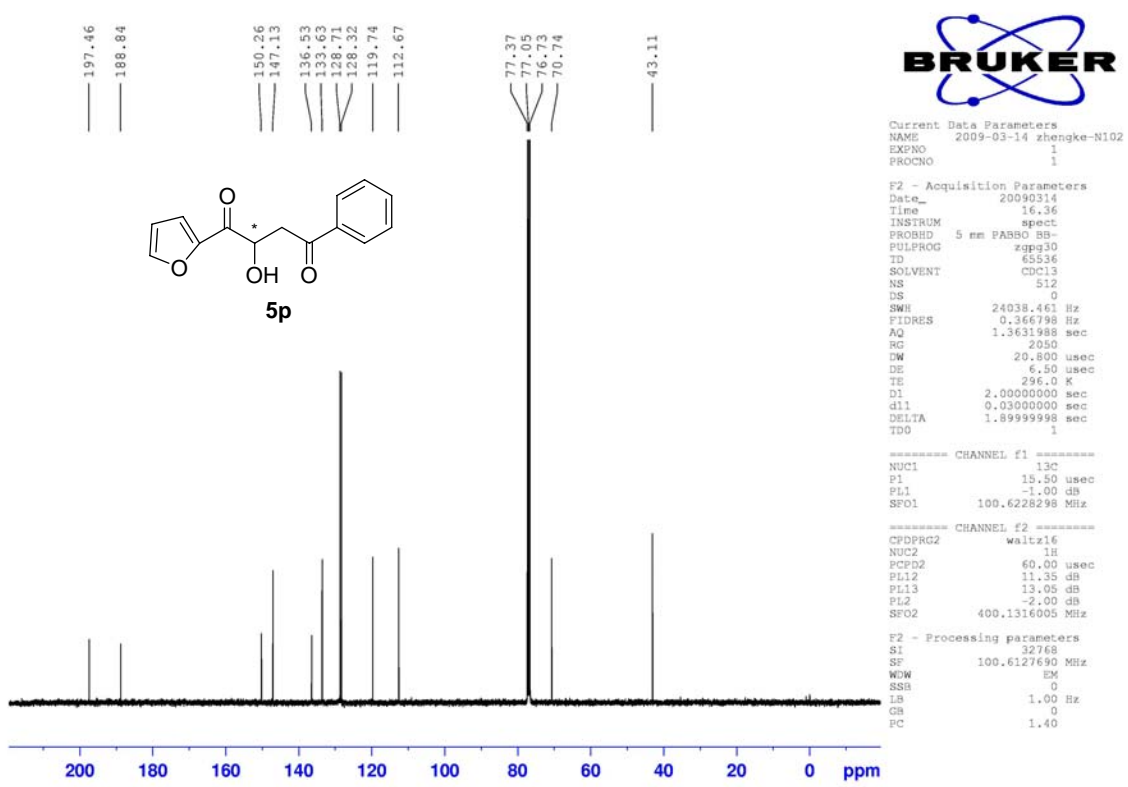

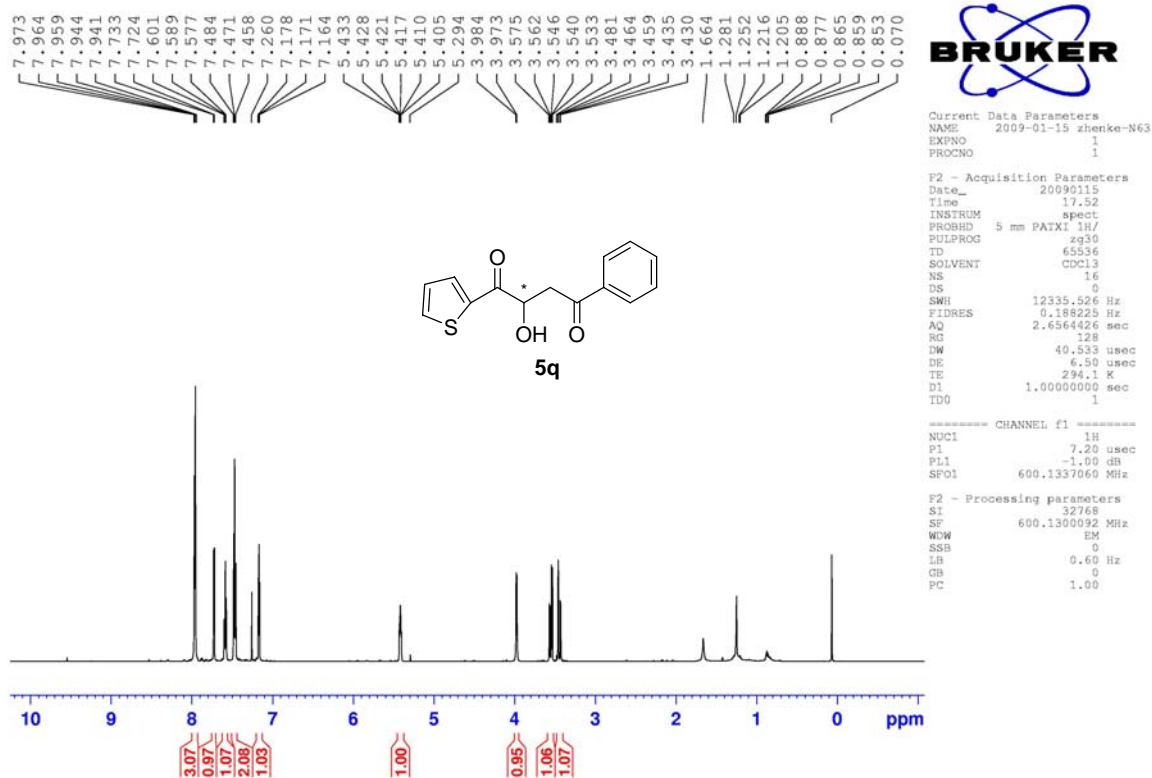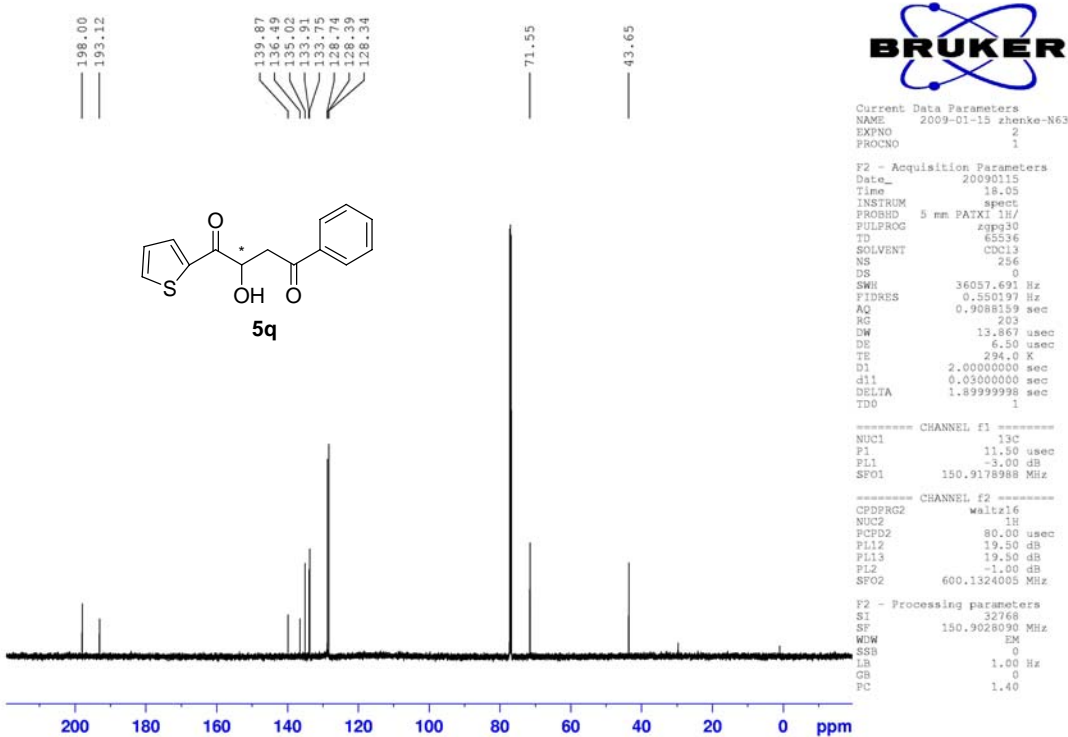

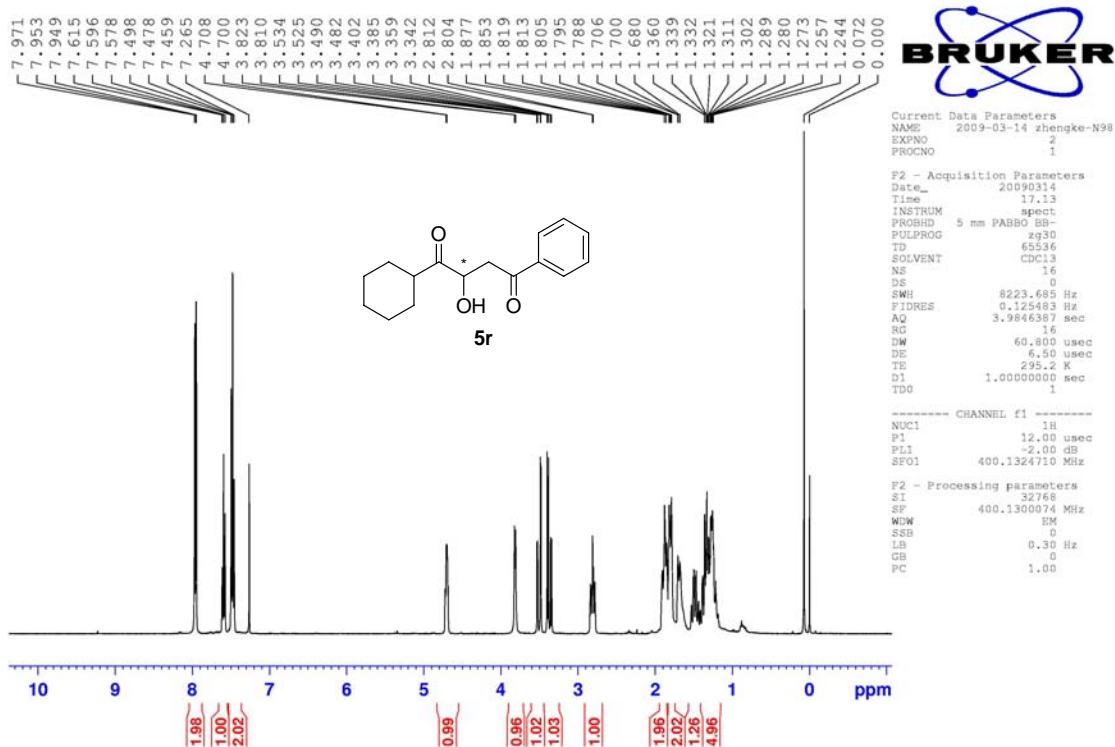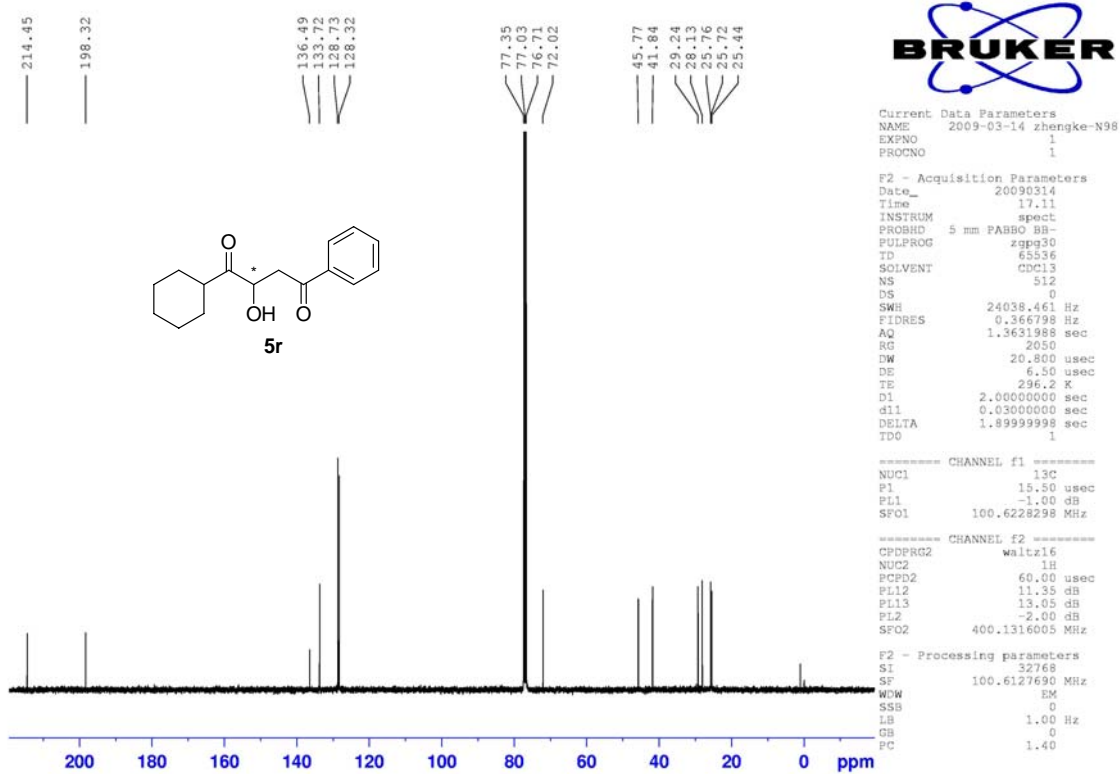

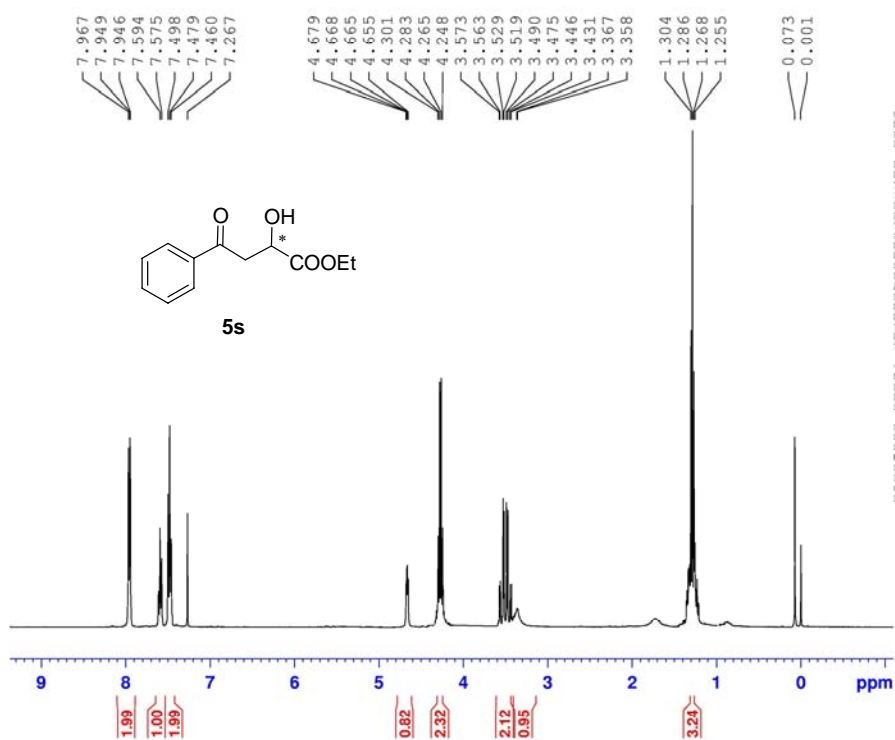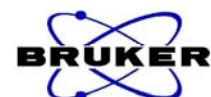

Current Data Parameters  
NAME 2009-05-04 zhenke-zk-N161  
EXPNO 1  
PROCNO 1

F2 - Acquisition Parameters  
Date\_ 20090504  
Time 15.54  
INSTRUM spect  
PROBHD 5 mm PABBO BB-  
PULPROG zg30  
TD 65536  
SOLVENT CDCl3  
NS 16  
DS 0  
SWH 8223.685 Hz  
FIDRES 0.125483 Hz  
AQ 3.9846387 sec  
RG 101  
DW 60.800 usec  
DE 6.50 usec  
TE 298.2 K  
D1 1.00000000 sec  
TDO 1

----- CHANNEL f1 -----  
NUC1 1H  
P1 12.00 usec  
PL1 -2.00 dB  
SFO1 400.1324710 MHz

F2 - Processing parameters  
SI 32768  
SF 400.1300064 MHz  
WDW EM  
SSB 0  
LB 0.30 Hz  
GB 0  
PC 1.00

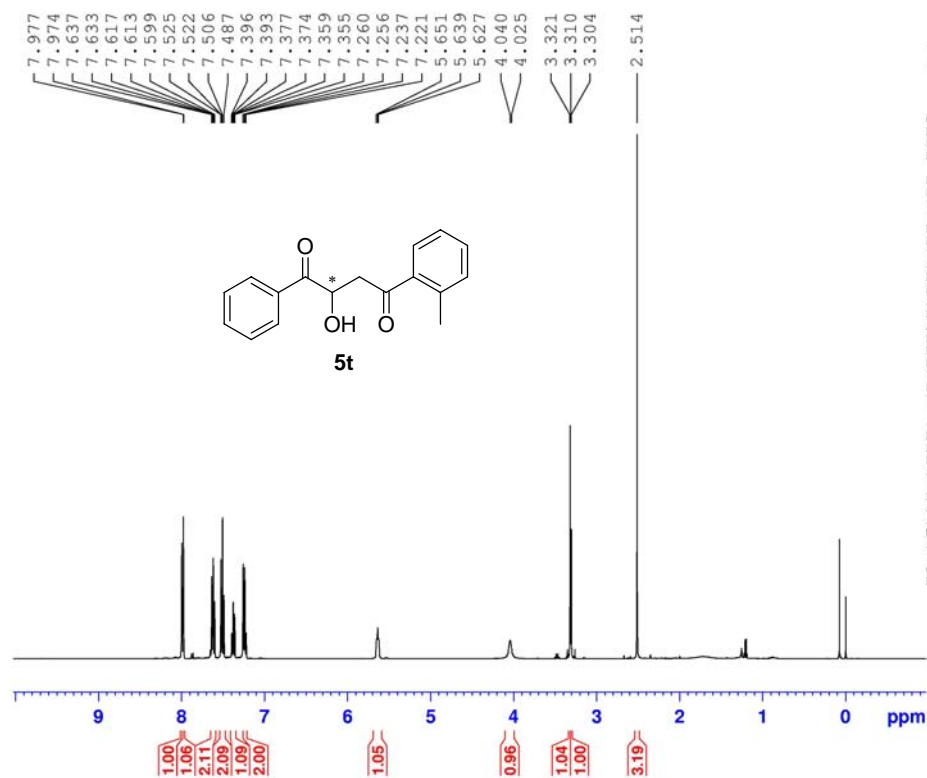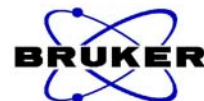

Current Data Parameters  
NAME 2009-03-10 zhenqke N85  
EXPNO 1  
PROCNO 1

F2 - Acquisition Parameters  
Date\_ 20090310  
Time 11.24  
INSTRUM spect  
PROBHD 5 mm PABBO BB-  
PULPROG zg30  
TD 65536  
SOLVENT CDCl3  
NS 16  
DS 0  
SWH 8223.685 Hz  
FIDRES 0.125483 Hz  
AQ 3.9846387 sec  
RG 144  
DW 60.800 usec  
DE 6.50 usec  
TE 295.1 K  
D1 1.00000000 sec  
TDO 1

----- CHANNEL f1 -----  
NUC1 1H  
P1 12.00 usec  
PL1 -2.00 dB  
SFO1 400.1324710 MHz

F2 - Processing parameters  
SI 32768  
SF 400.1300091 MHz  
WDW GM  
SSB 0  
LB -0.20 Hz  
GB 0.1  
PC 1.00

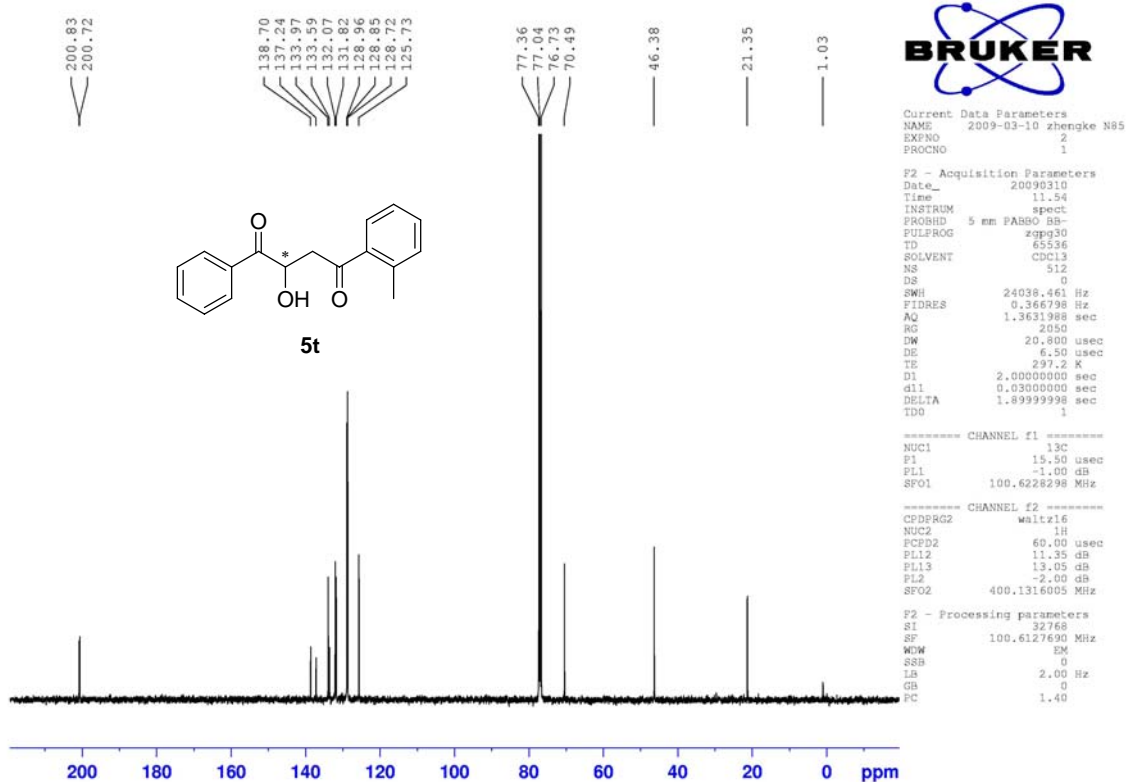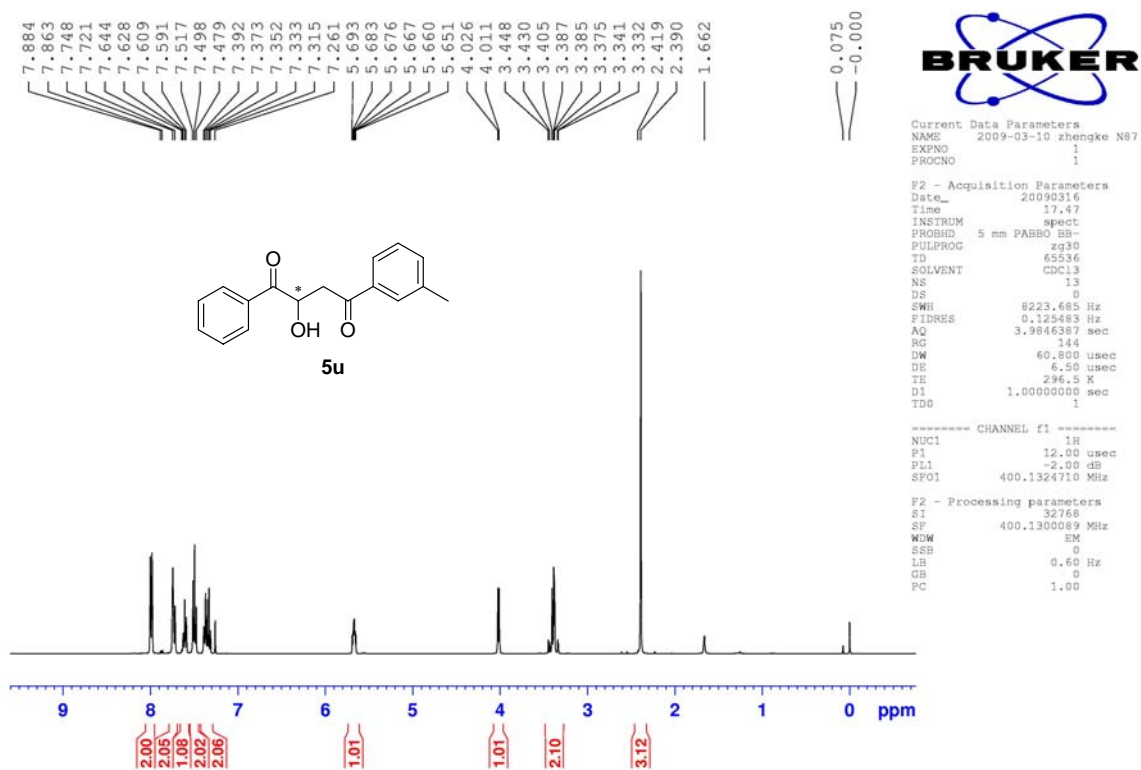

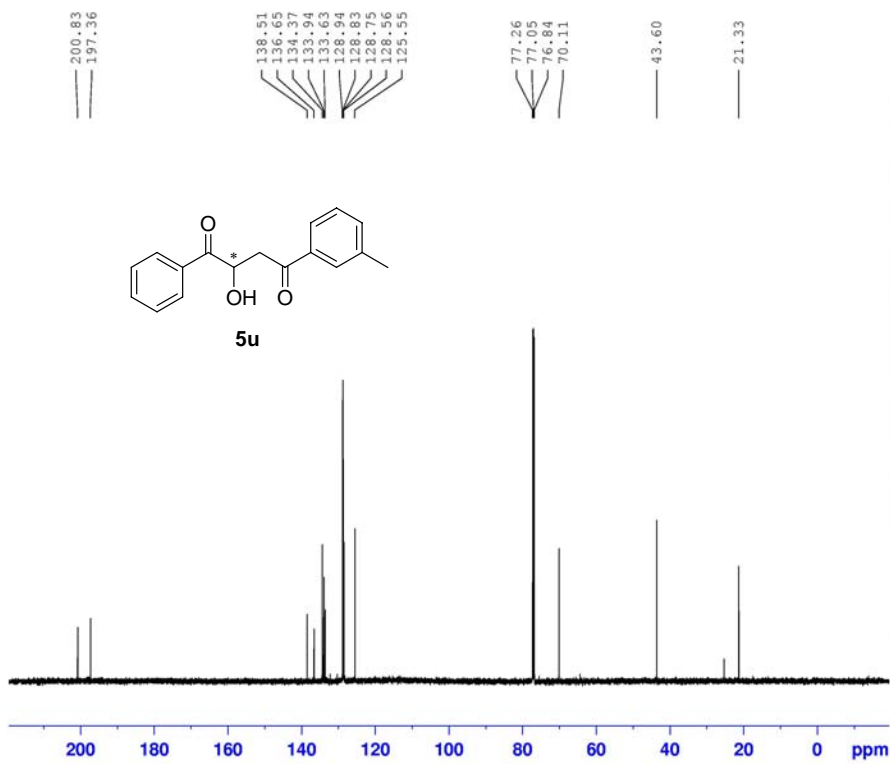

**BRUKER**

Current Data Parameters  
NAME 2009-03-10 zhengke-ZK-N87  
EXPNO 1  
PROCNO 1

F2 - Acquisition Parameters  
Date\_ 20090310  
Time 15.09  
INSTRUM spect  
PROBHD 5 mm PAXI 1H/  
PULPROG zgpg30  
TD 65536  
SOLVENT CDCl3  
NS 256  
DS 0  
SWH 36857.691 Hz  
FIDRES 0.550197 Hz  
AQ 0.9088159 sec  
RG 2050  
DW 13.867 usec  
DE 6.50 usec  
TE 295.8 K  
D1 2.0000000 sec  
d11 0.0300000 sec  
DELTA 1.8999999 sec  
TDO 1

----- CHANNEL f1 -----  
NUC1 13C  
P1 11.50 usec  
PL1 -3.00 dB  
SFO1 150.9178988 MHz

----- CHANNEL f2 -----  
CPDPRG2 waltz16  
NUC2 1H  
PCPD2 80.00 usec  
PL12 19.50 dB  
PL13 19.50 dB  
PL2 1.00 dB  
SFO2 600.1324005 MHz

F2 - Processing parameters  
SI 32768  
SF 150.9028090 MHz  
WDW EM  
SSB 0  
LB 1.00 Hz  
GB 0  
PC 1.40

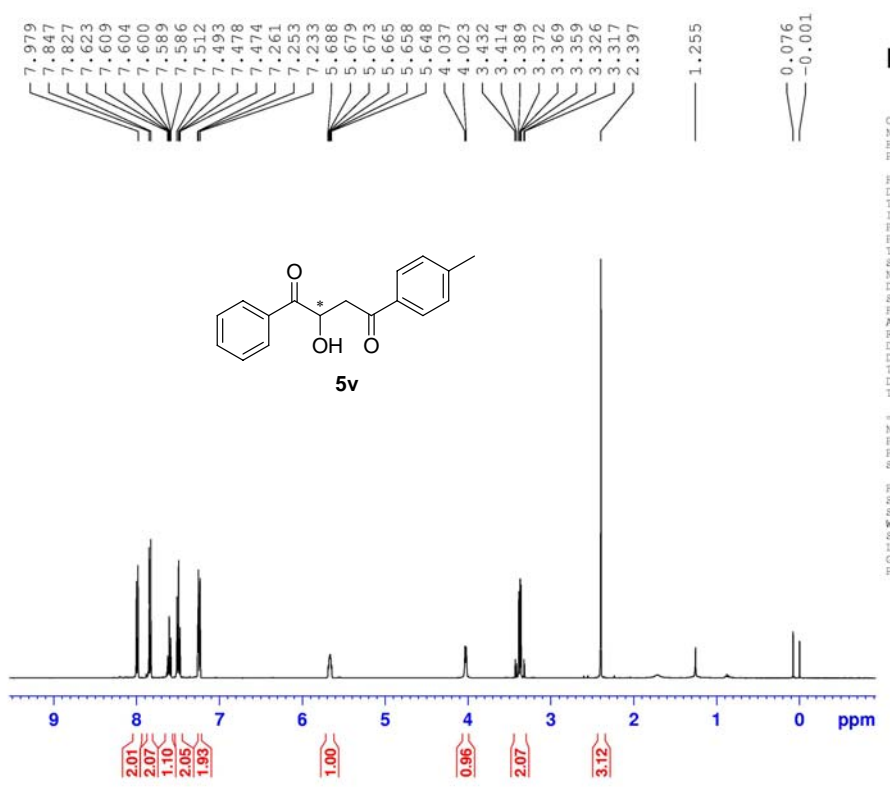

**BRUKER**

Current Data Parameters  
NAME 2009-03-02 zhengke N82  
EXPNO 1  
PROCNO 1

F2 - Acquisition Parameters  
Date\_ 20090302  
Time 17.50  
INSTRUM spect  
PROBHD 5 mm PABBO BS-  
PULPROG zg30  
TD 65536  
SOLVENT CDCl3  
NS 16  
DS 0  
SWH 8223.685 Hz  
FIDRES 0.125483 Hz  
AQ 3.9846387 sec  
RG 90.5  
DW 60.800 usec  
DE 6.50 usec  
TE 295.9 K  
D1 1.0000000 sec  
TDO 1

----- CHANNEL f1 -----  
NUC1 1H  
P1 12.00 usec  
PL1 -2.00 dB  
SFO1 400.1324710 MHz

F2 - Processing parameters  
SI 32768  
SF 400.1300088 MHz  
WDW GM  
SSB 0  
LB -0.20 Hz  
GB 0.1  
PC 1.00



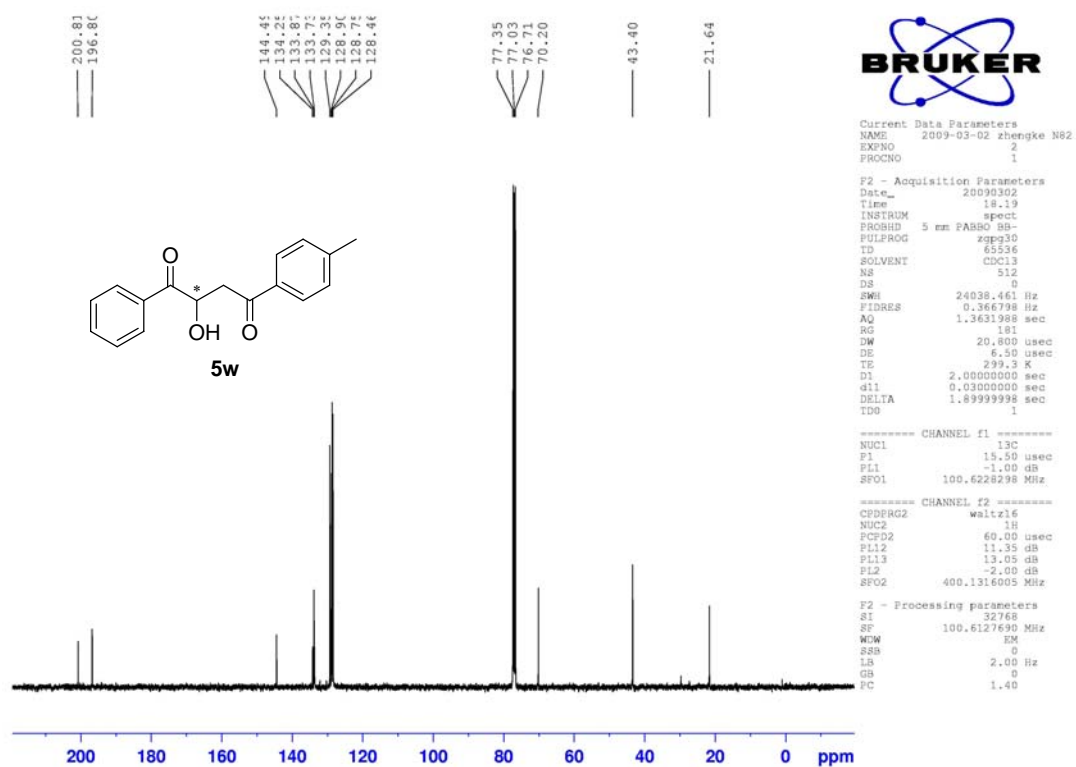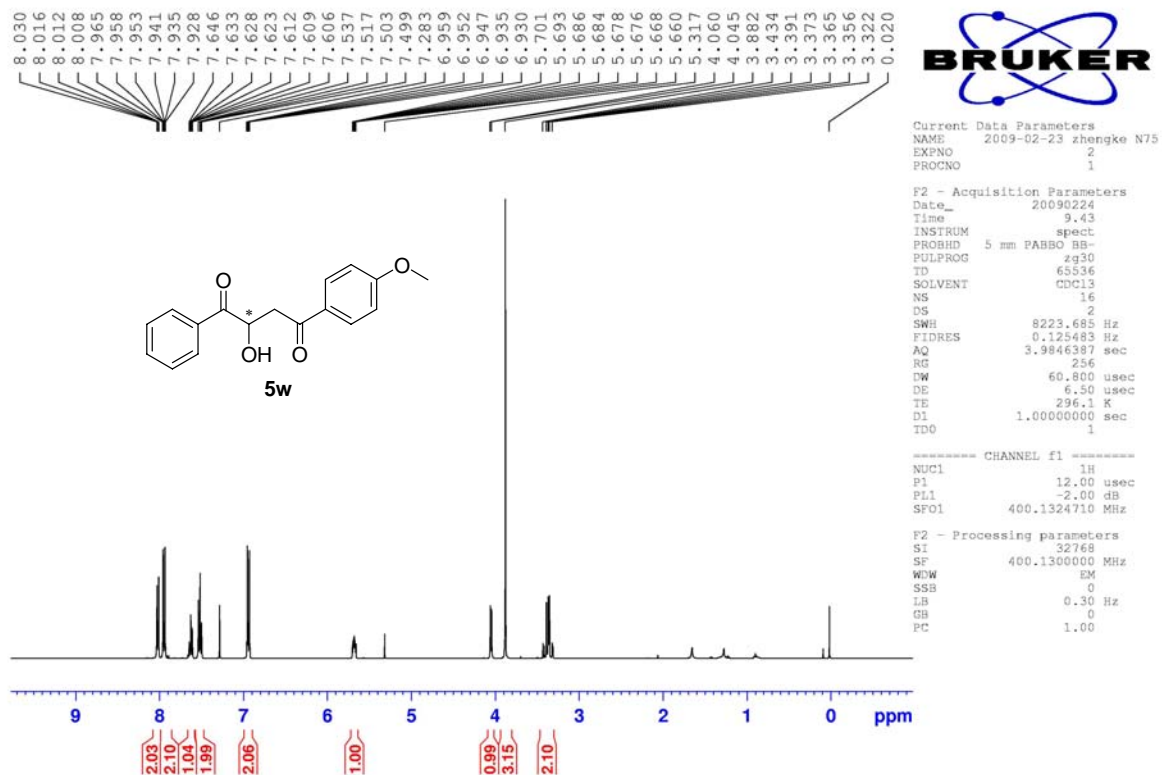

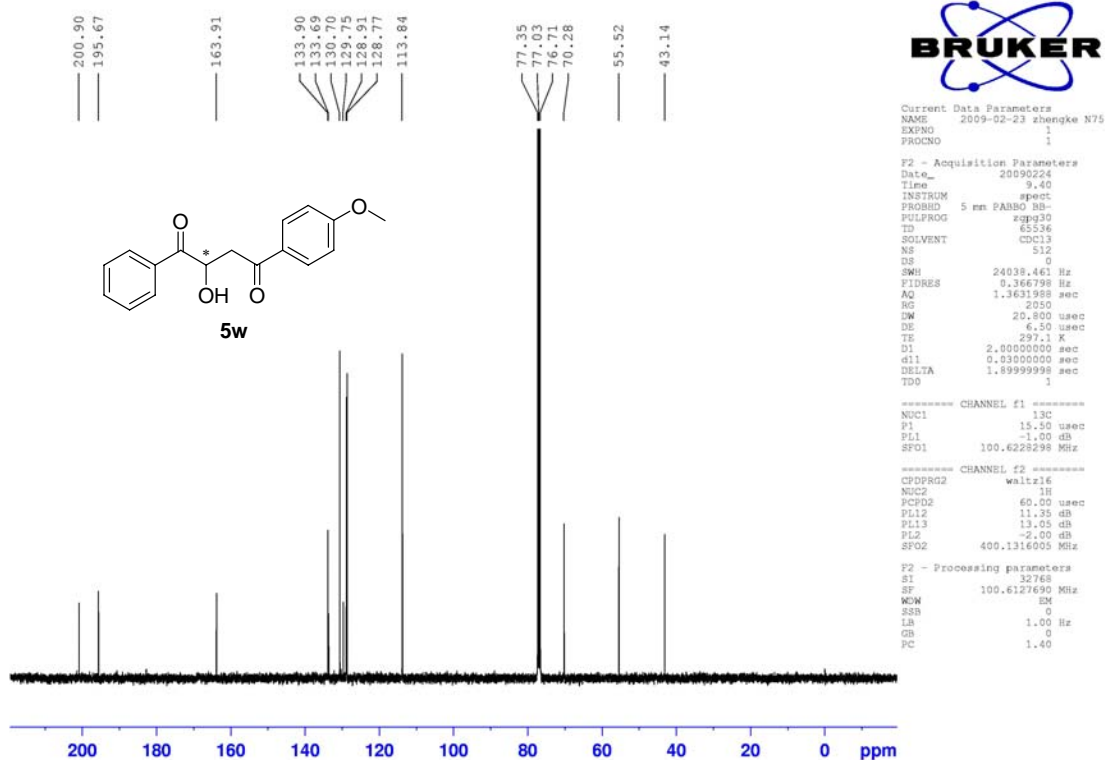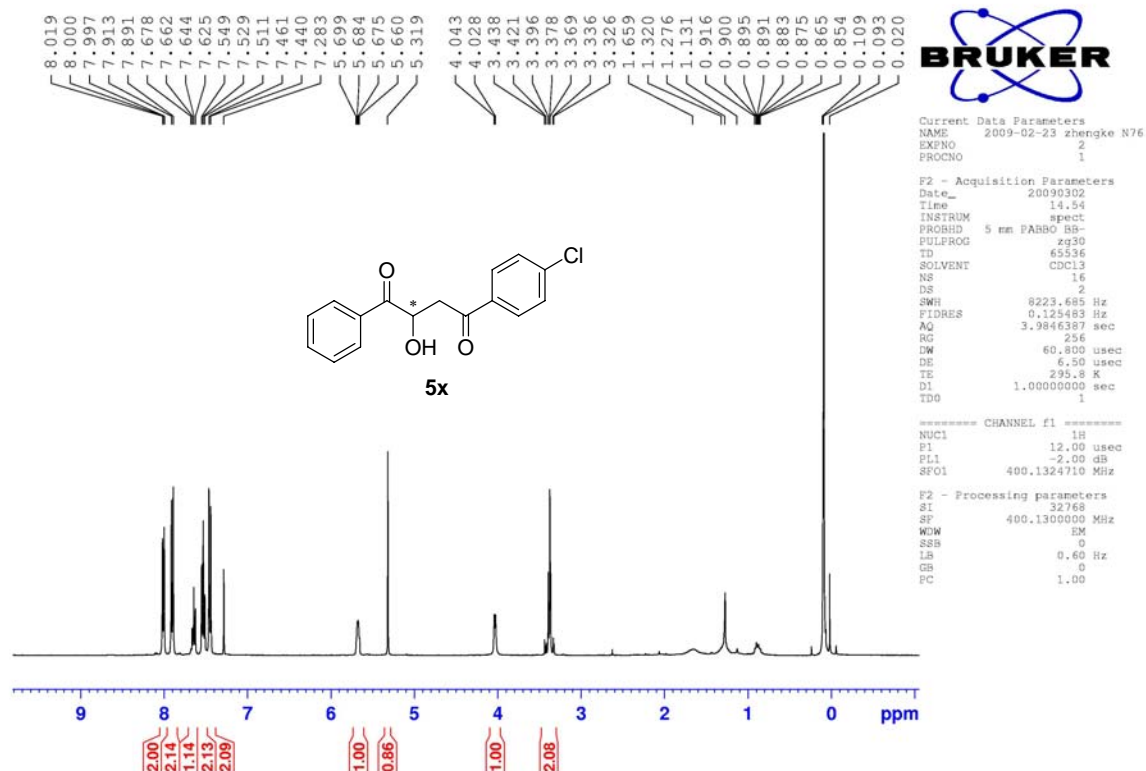



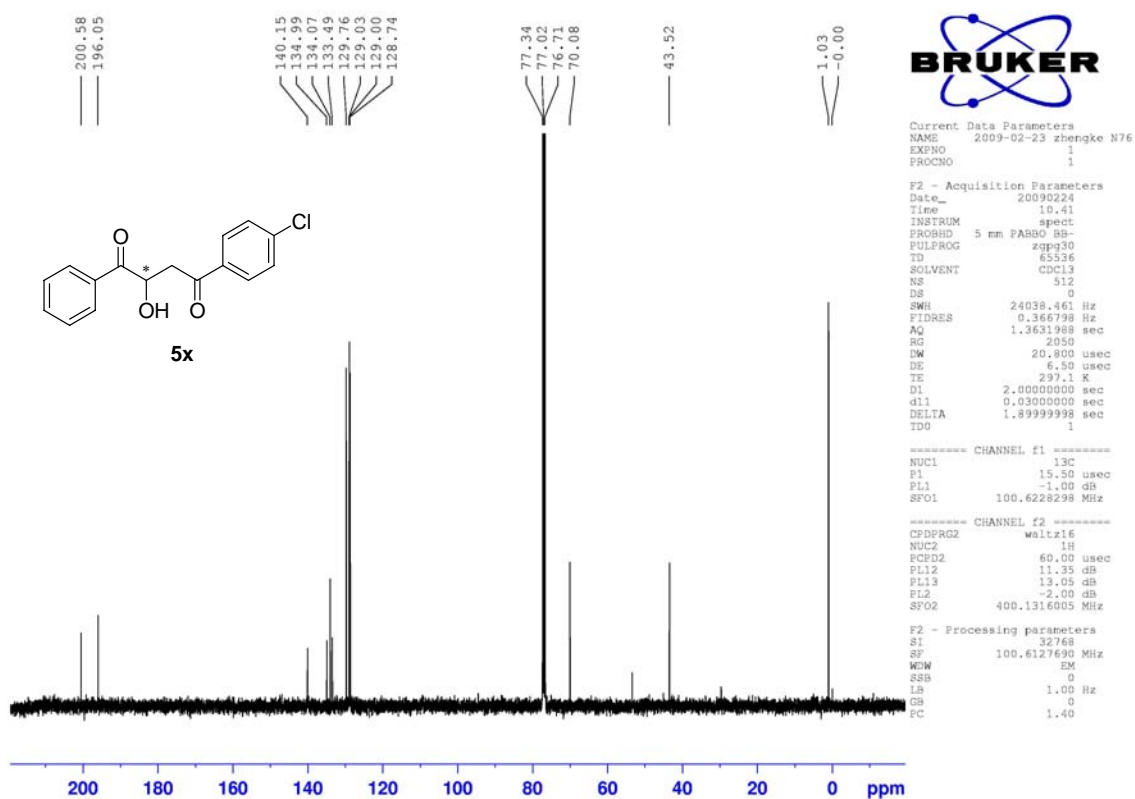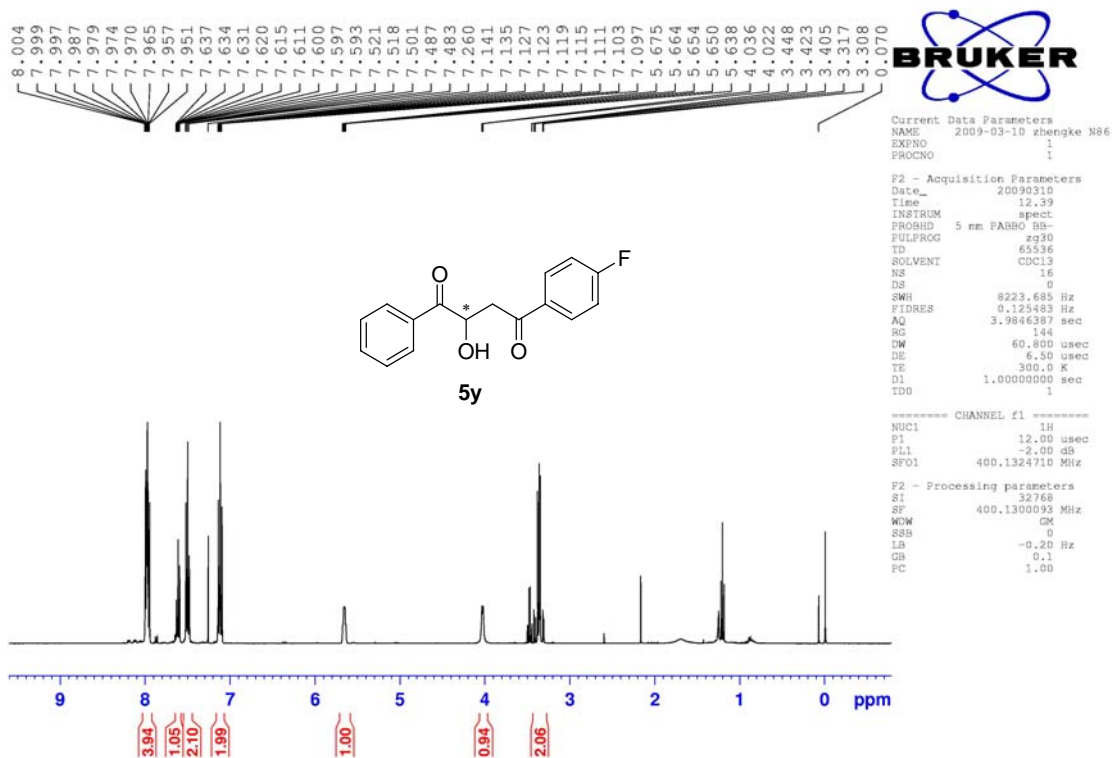

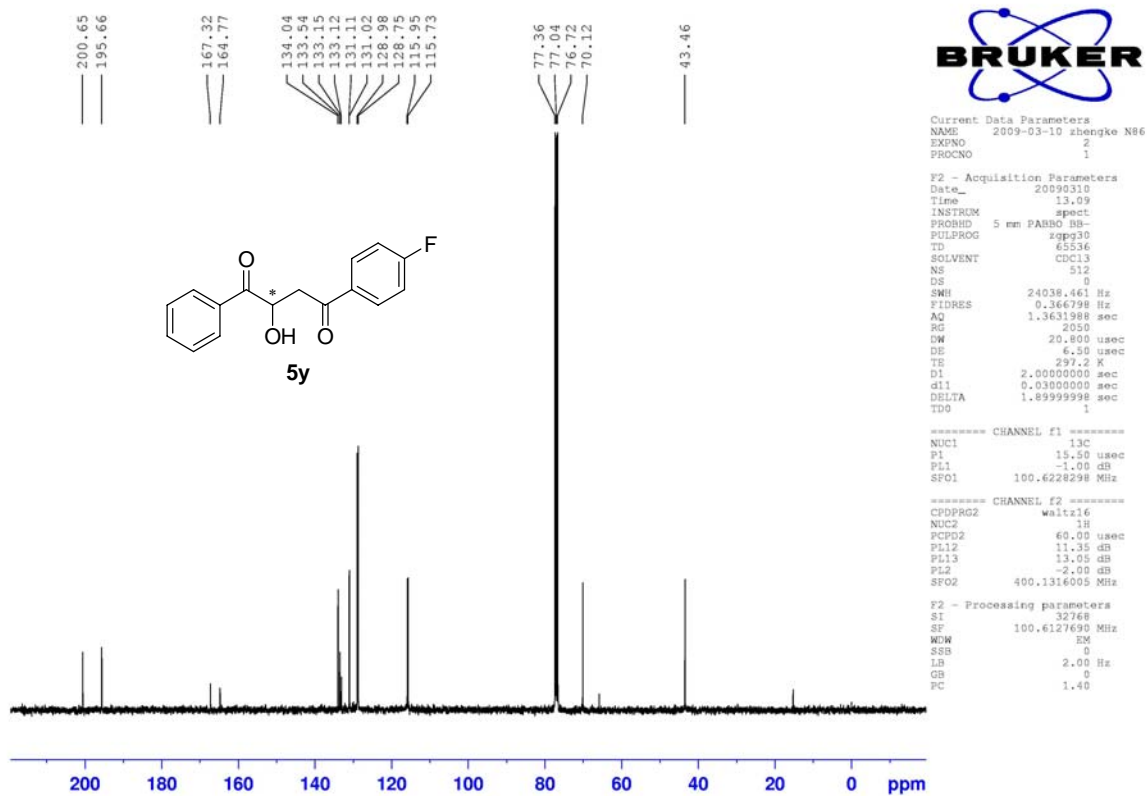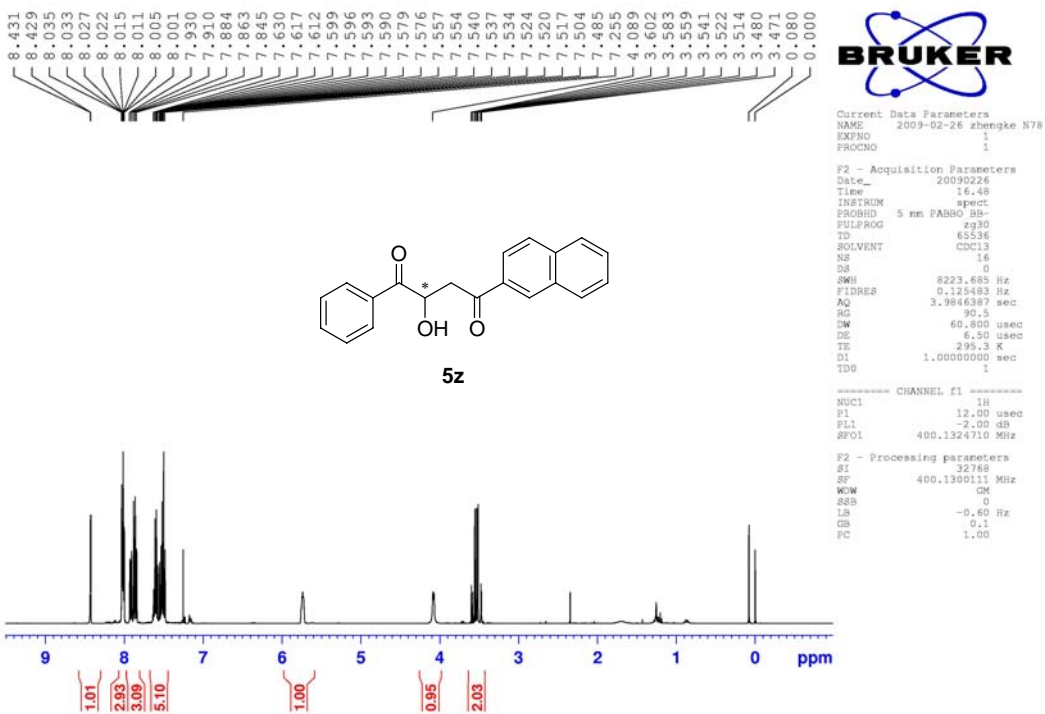

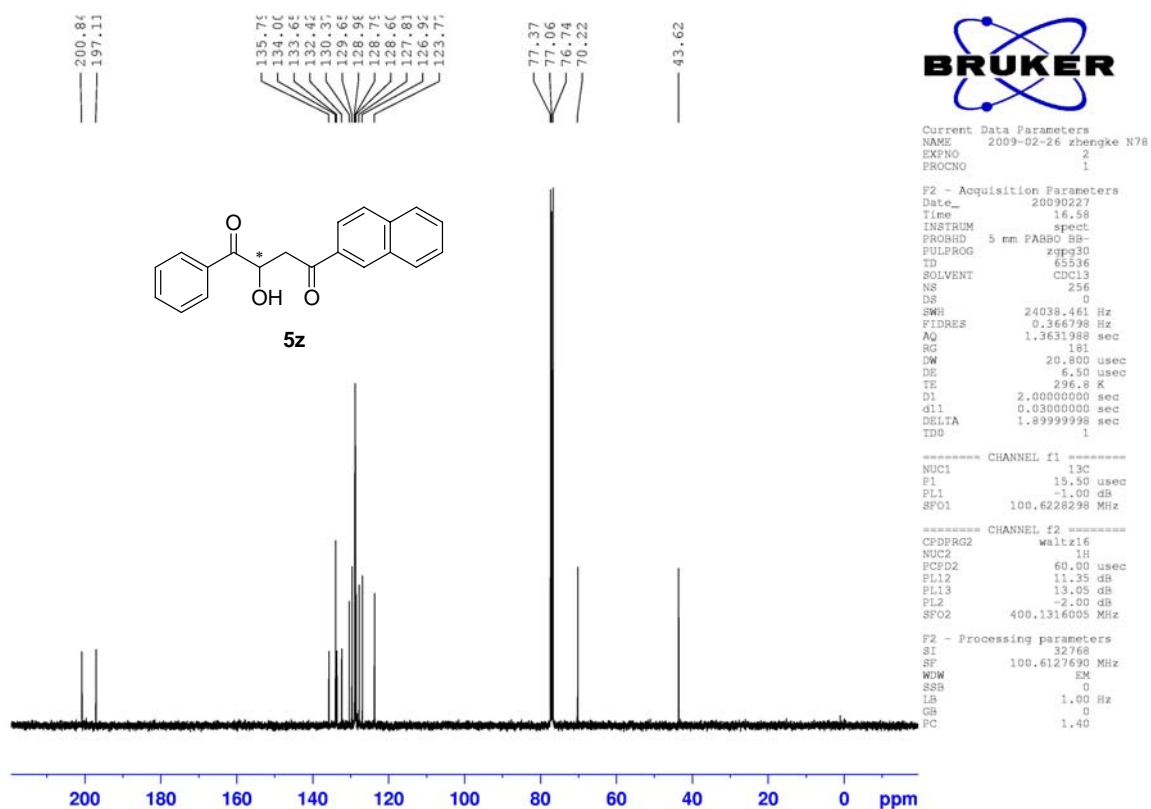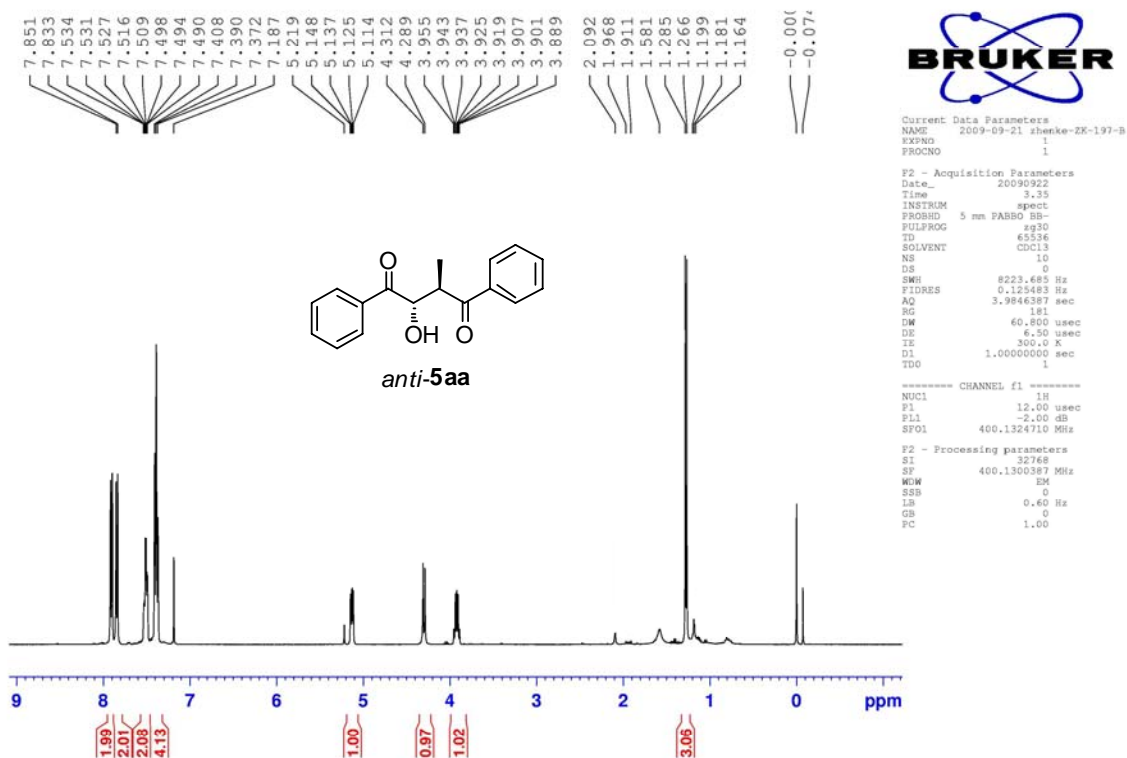

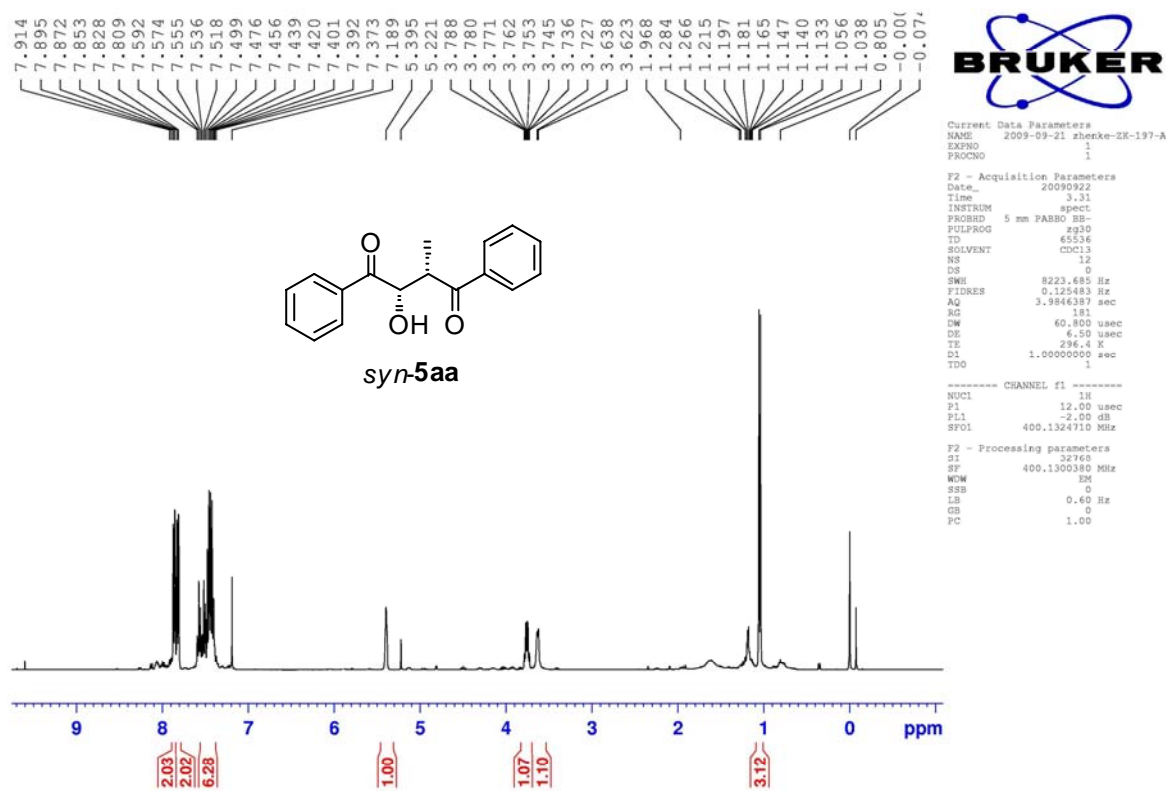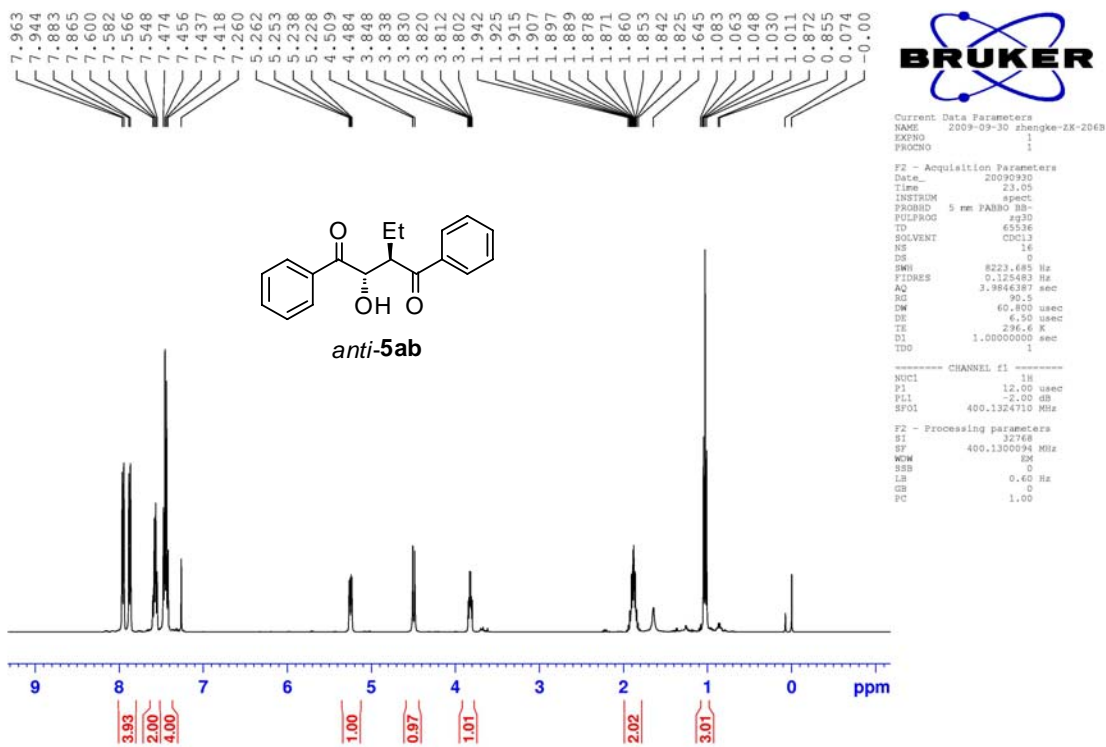

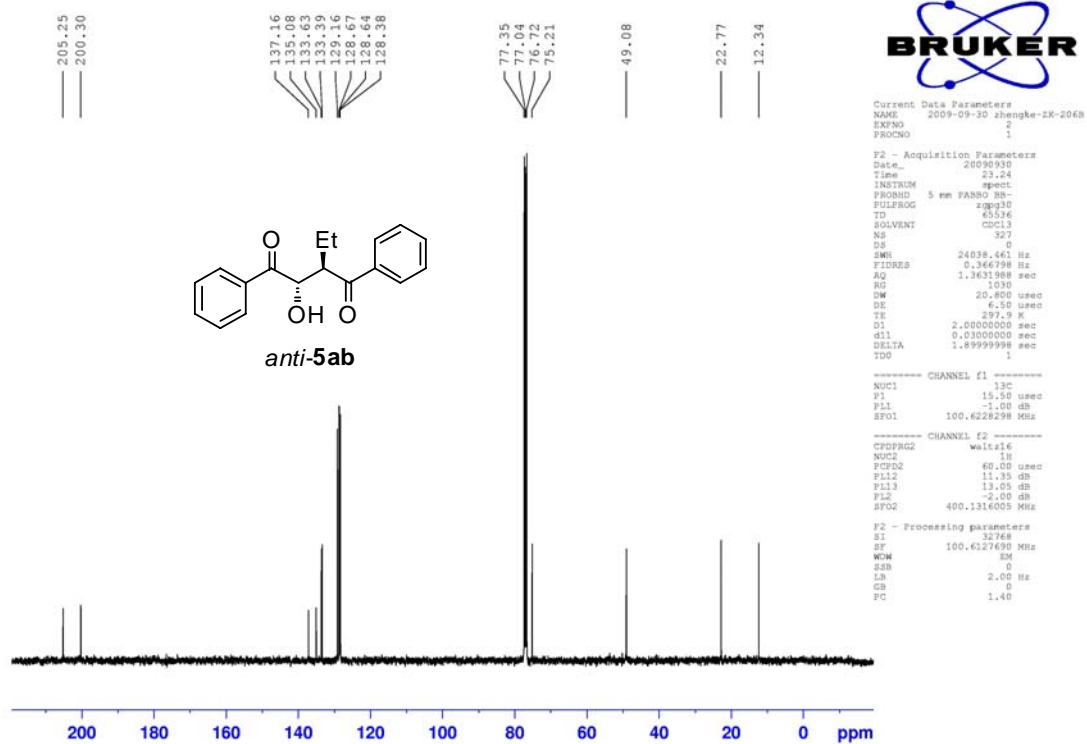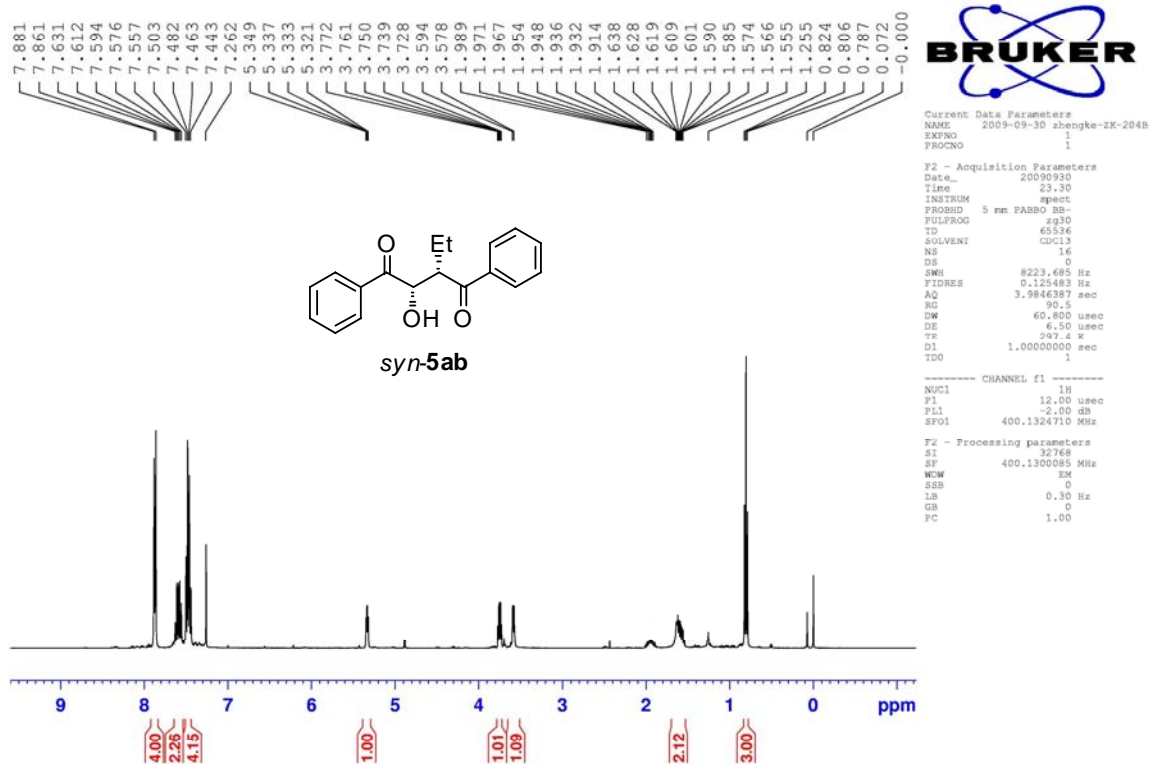

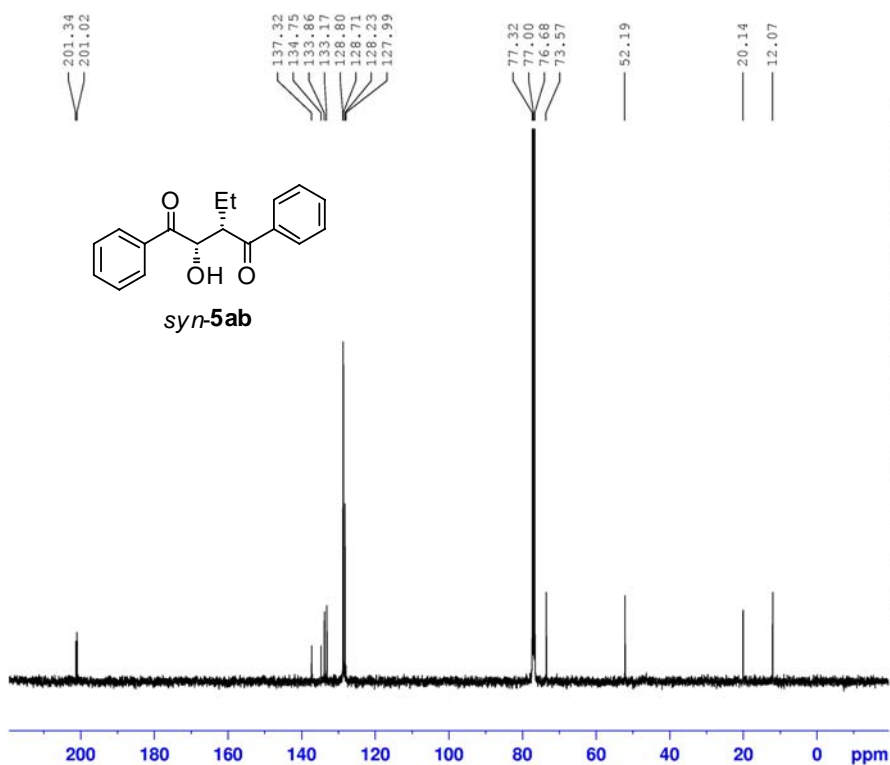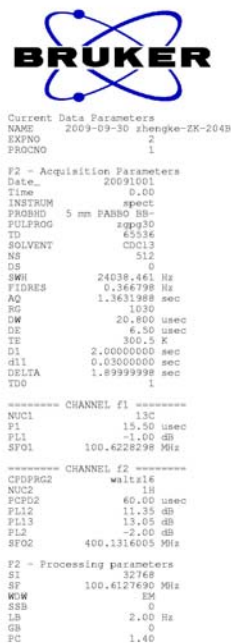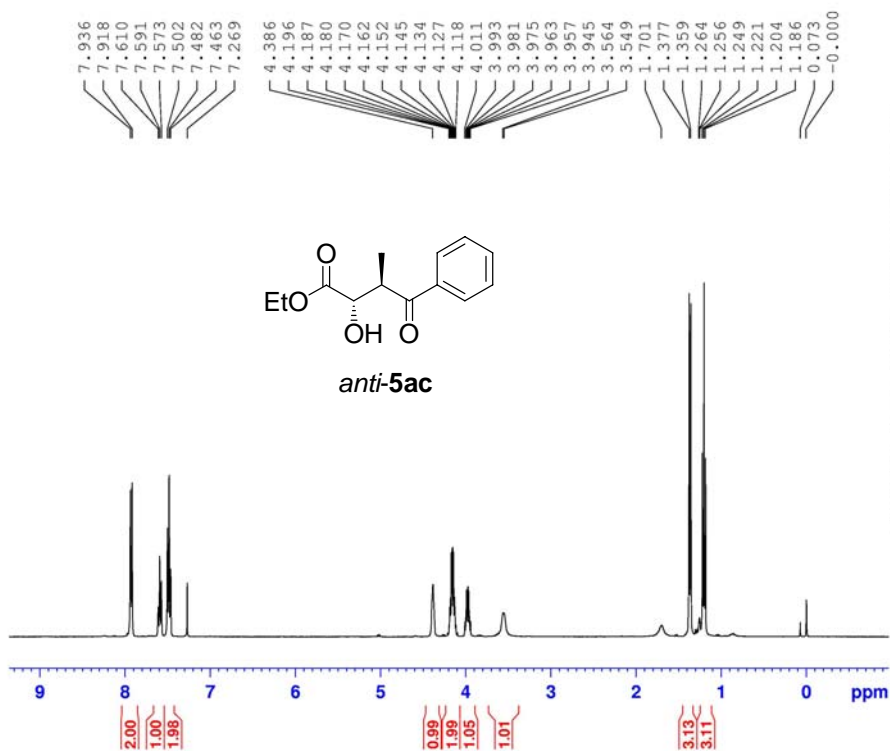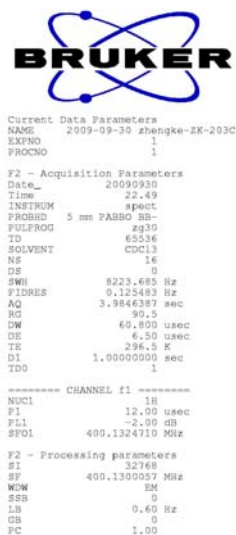



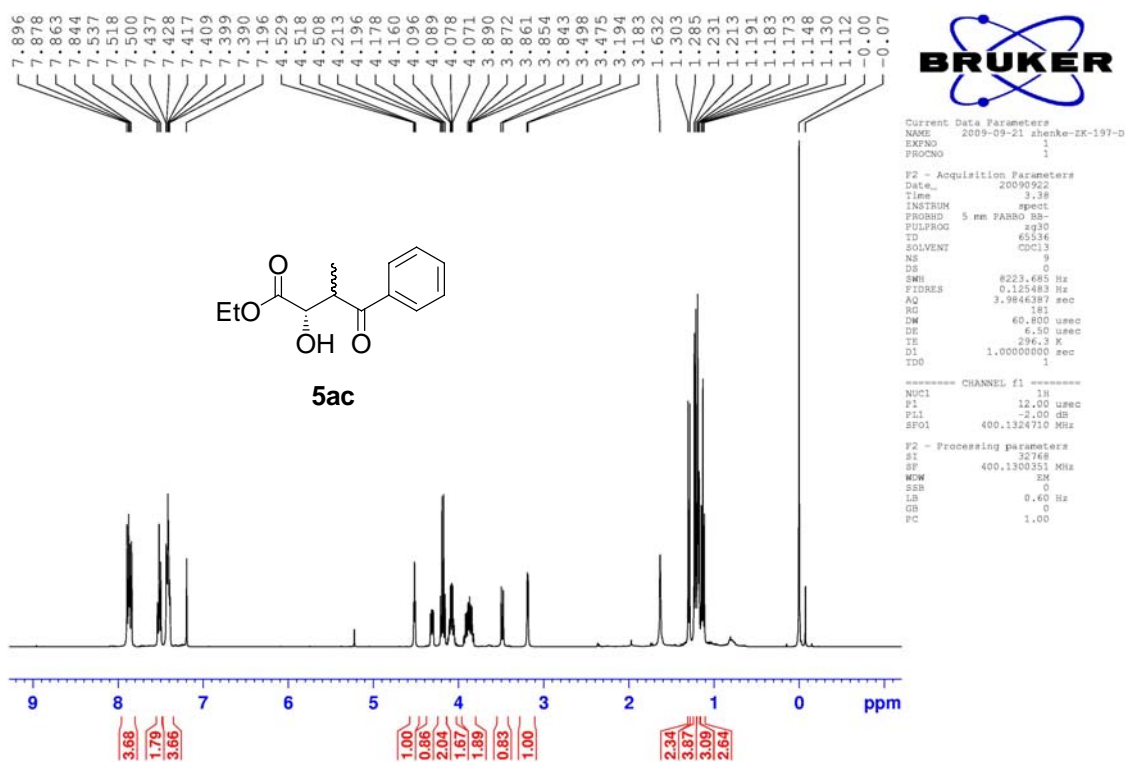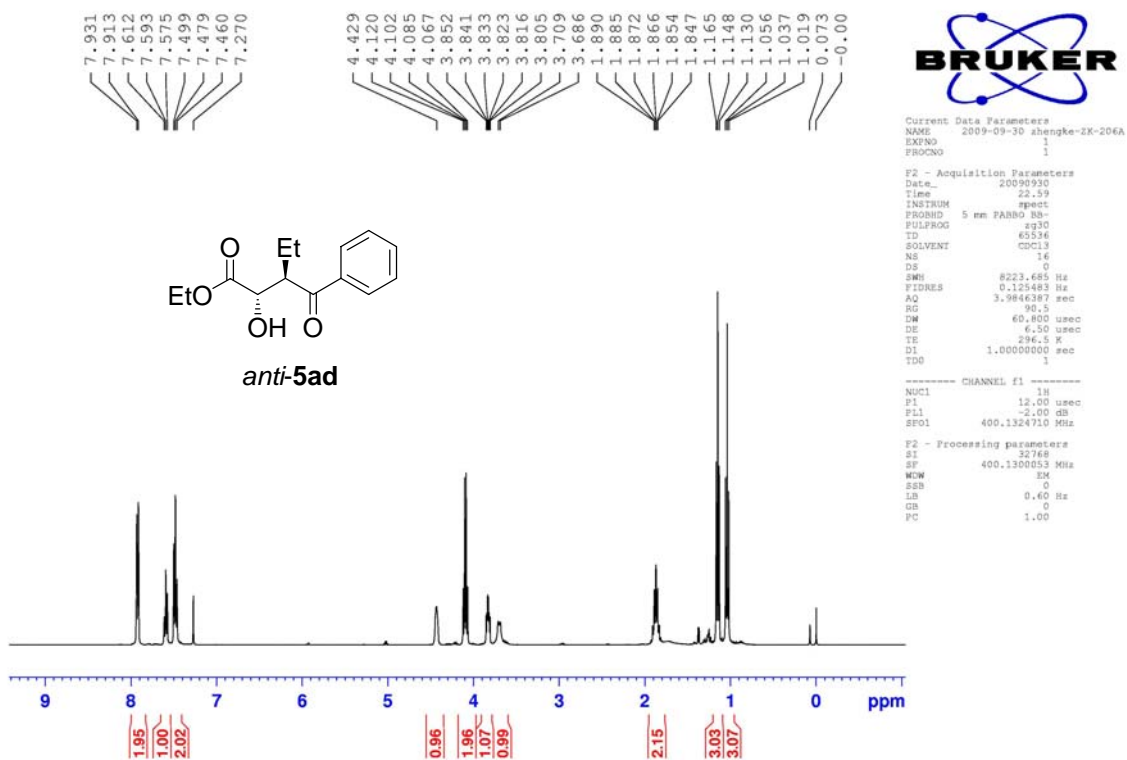

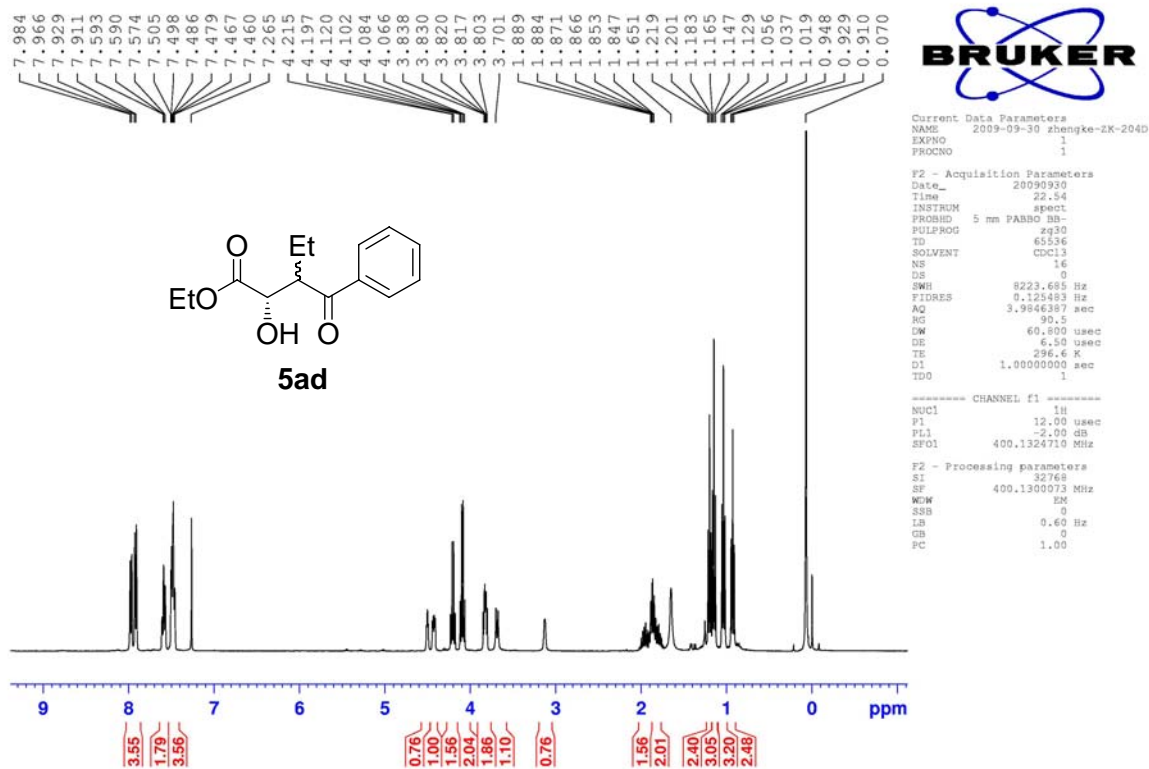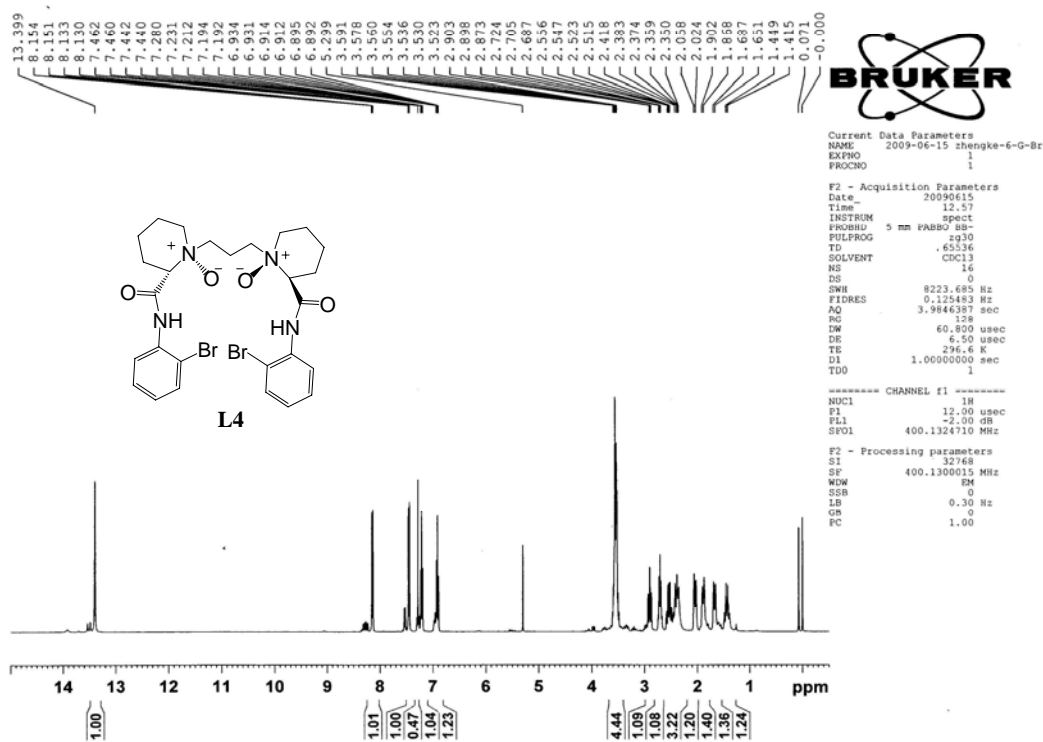



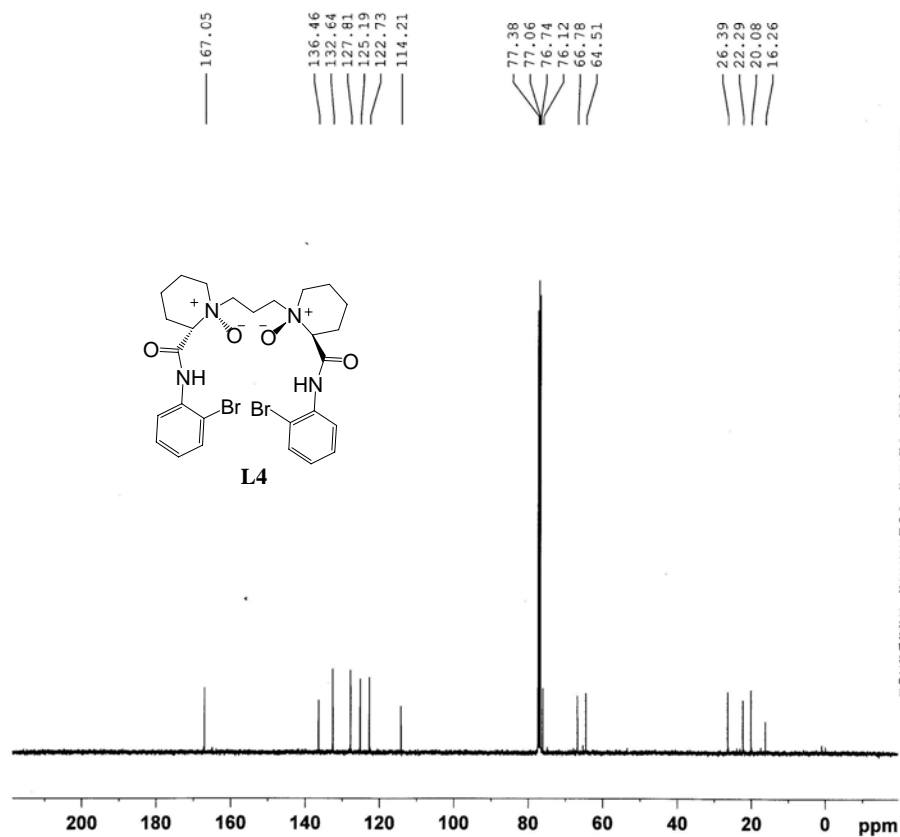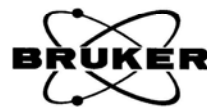

Current Data Parameters  
 NAME 2009-06-15 zhengke-6-G-Br  
 EXPNO 2  
 PROCNO 1

F2 - Acquisition Parameters  
 Date\_ 20090615  
 Time 13.26  
 INSTRUM spect  
 FROBHD 5 mm PABBO BB-  
 FULPROG zgpg30  
 TD 65536  
 SOLVENT CDCl3  
 NS 512  
 DS 0  
 SWH 24038.461 Hz  
 FIDRES 0.366798 Hz  
 AQ 1.3631988 sec  
 RG 2050  
 DW 20.800 usec  
 DE 6.50 usec  
 TE 297.7 K  
 D1 2.00000000 sec  
 d11 0.03000000 sec  
 DELTA 1.89999998 sec  
 TDO 1

----- CHANNEL f1 -----  
 NUC1 13C  
 P1 15.50 usec  
 PL1 -1.00 dB  
 SF01 100.6228298 MHz

----- CHANNEL f2 -----  
 CPDPRG2 waltz16  
 NUC2 1H  
 ECPD2 60.00 usec  
 PL12 11.35 dB  
 PL13 13.05 dB  
 PL2 -2.00 dB  
 SF02 400.1316005 MHz

F2 - Processing parameters  
 SI 32768  
 SF 100.6127690 MHz  
 WDW EM  
 SSB 0  
 LB 1.00 Hz  
 GB 0  
 PC 1.40

## (G) References

1. B. Qin, X. H. Liu, J. Shi, K. Zheng, H. T. Zhao, X. M. Feng, *J. Org. Chem.* 2007, **72**, 2374-2378, and references therein.
2. a) M. Terada, K. Soga, N. Momiyama, *Angew. Chem., Int. Ed.* 2008, **47**, 4122-4125; b) R. Matsubara, P. Vital, Y. Nakamura, H. Kiyohara, S. Kobayashi, *Tetrahedron*, 2004, **60**, 9769-9784, and references therein.
3. a) Z. P. Yu, X. H. Liu, Z. H. Dong, M. S. Xie, X. M. Feng, *Angew. Chem., Int. Ed.* 2008, **47**, 1308-1311; b) D. J. Shang, Y. L. Liu, X. Zhou, X. H. Liu, X. M. Feng, *Chem. Eur. J.* 2009, **15**, 3678-3681, and references therein.
4. P. Herold, A. F. Indolese, M. Studer, H. P. Jalett, U. Siegrist, H. U. Blaser, *Tetrahedron*, 2000, **56**, 6497, and references therein.
